# Supplementary material for: FSP1 inhibition enhances olaparib sensitivity in BRCA-proficient ovarian cancer patients via a nonferroptosis mechanism
Source: PubMed Central journal article supplement (PMC11043371; doi:10.1038/s41418-024-01263-z), 2024-02-19

**Figure 2G**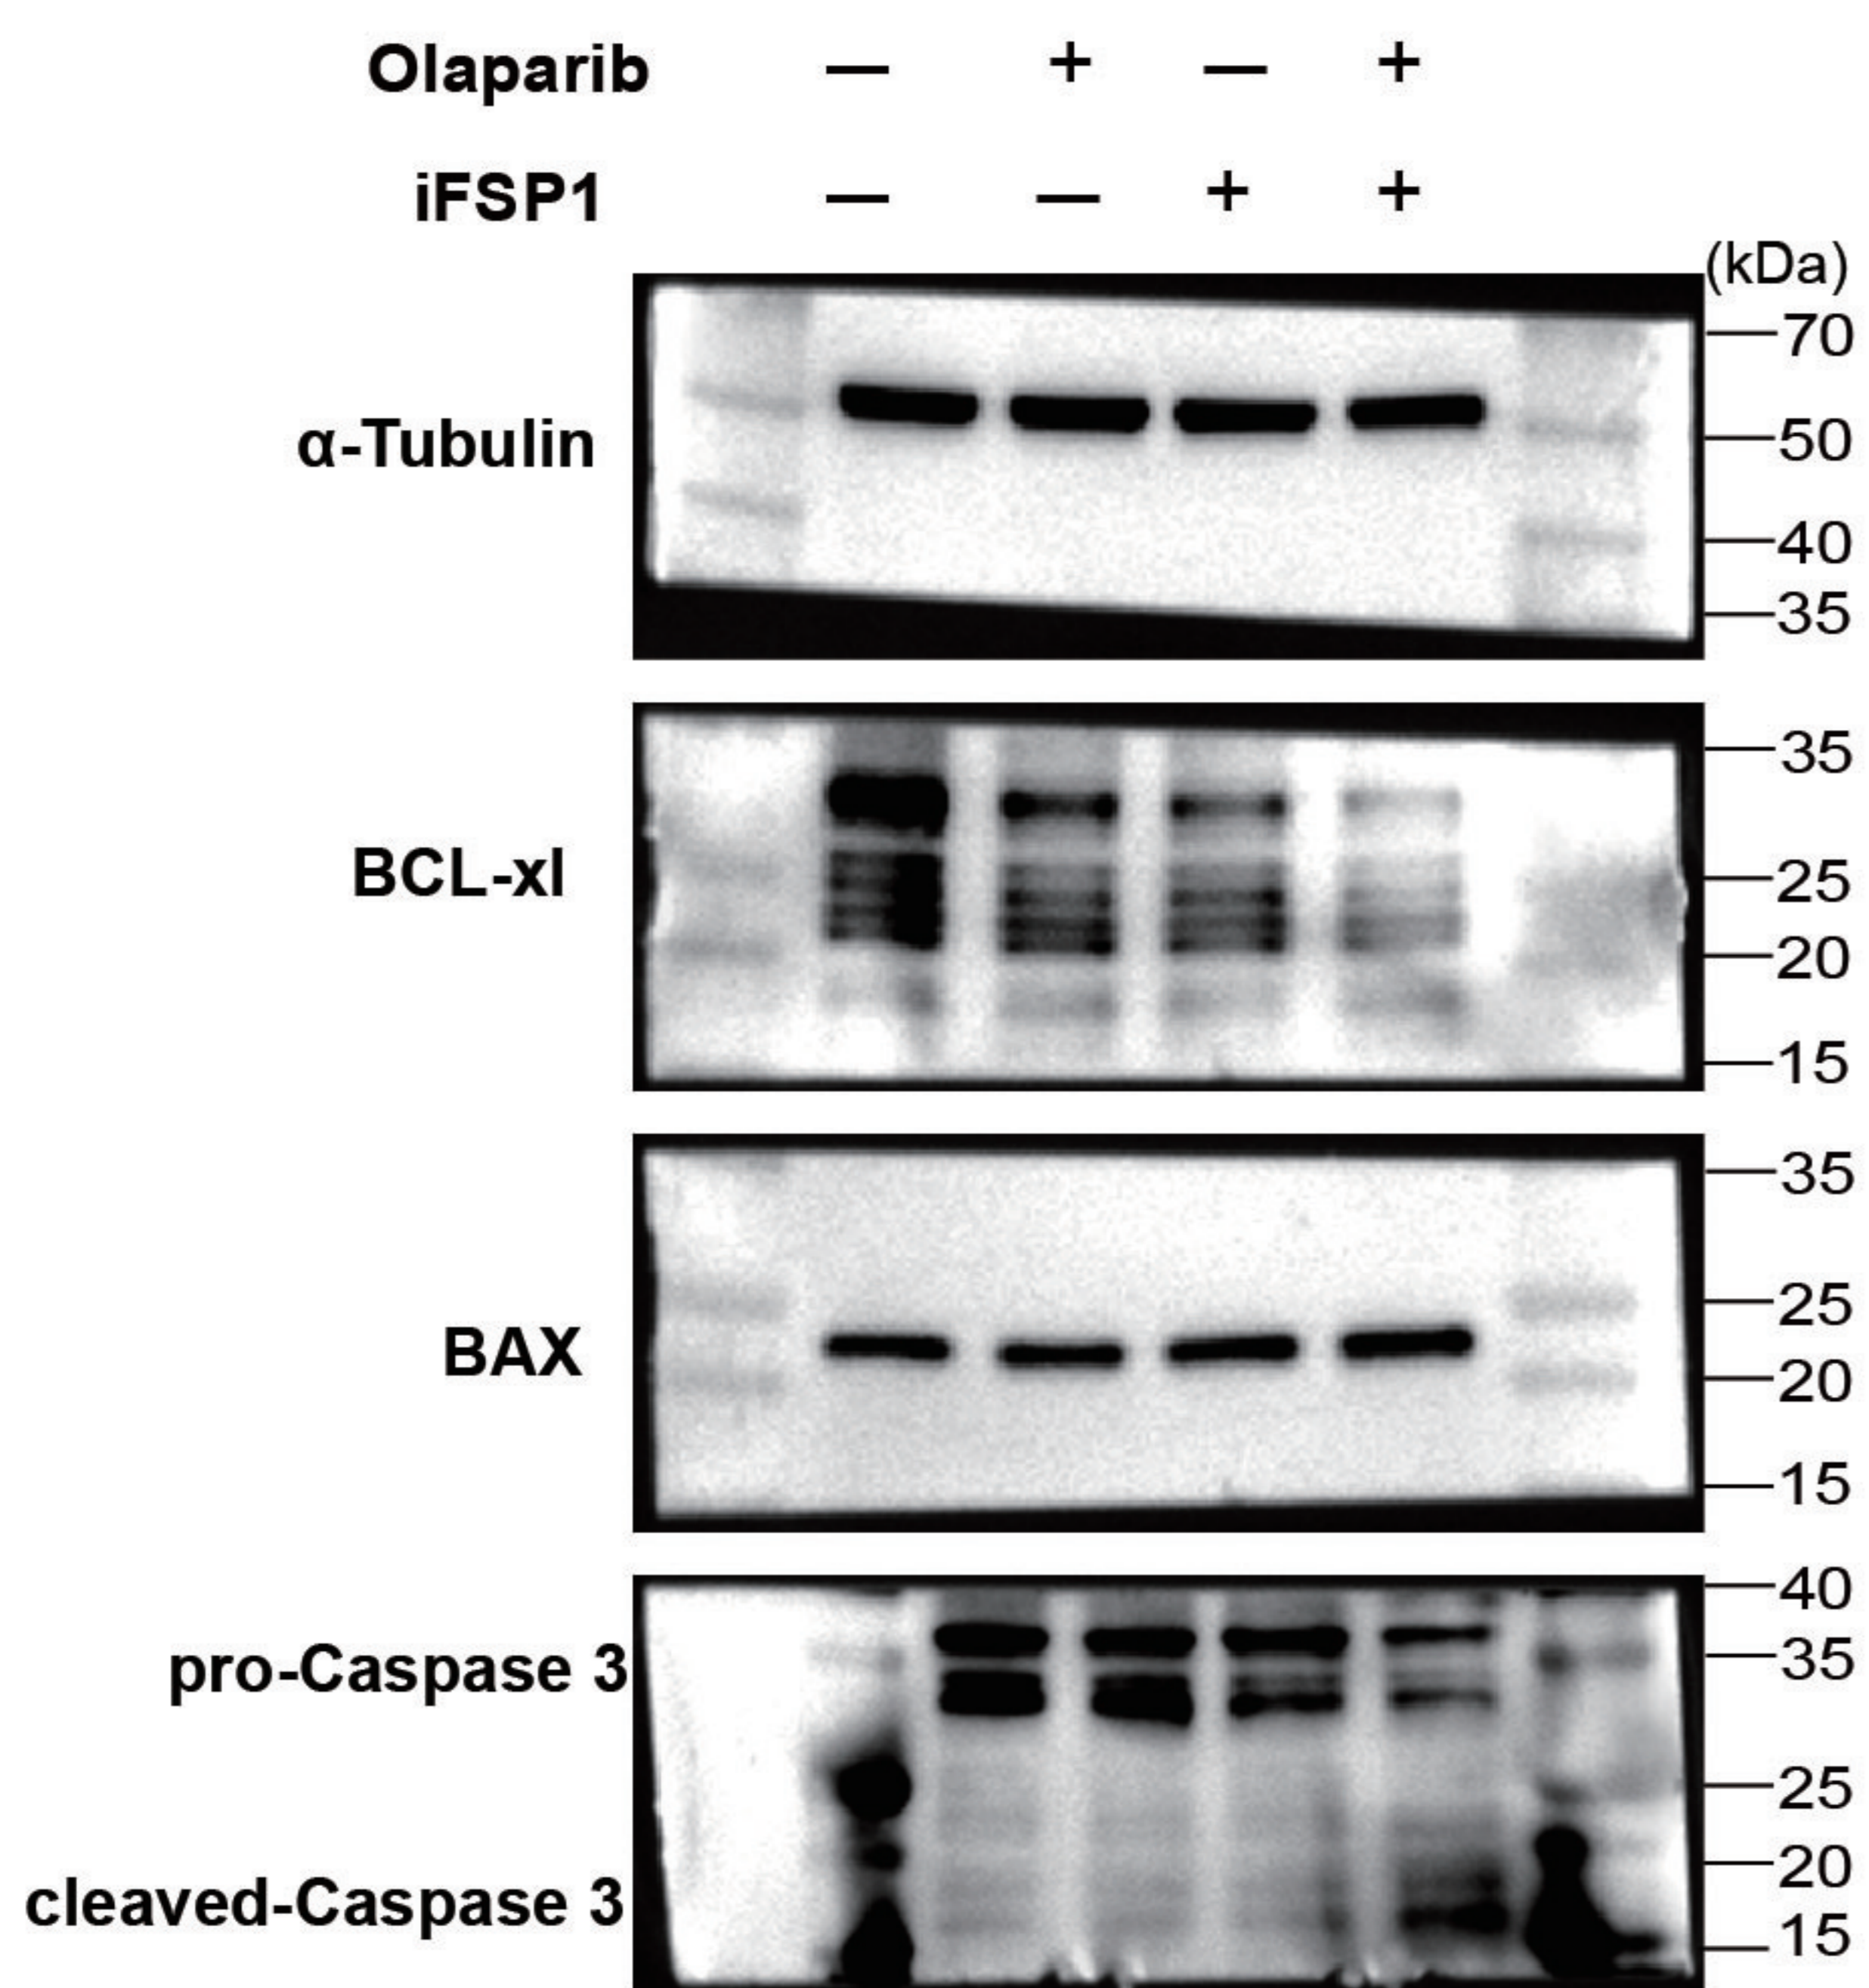**Figure 2I**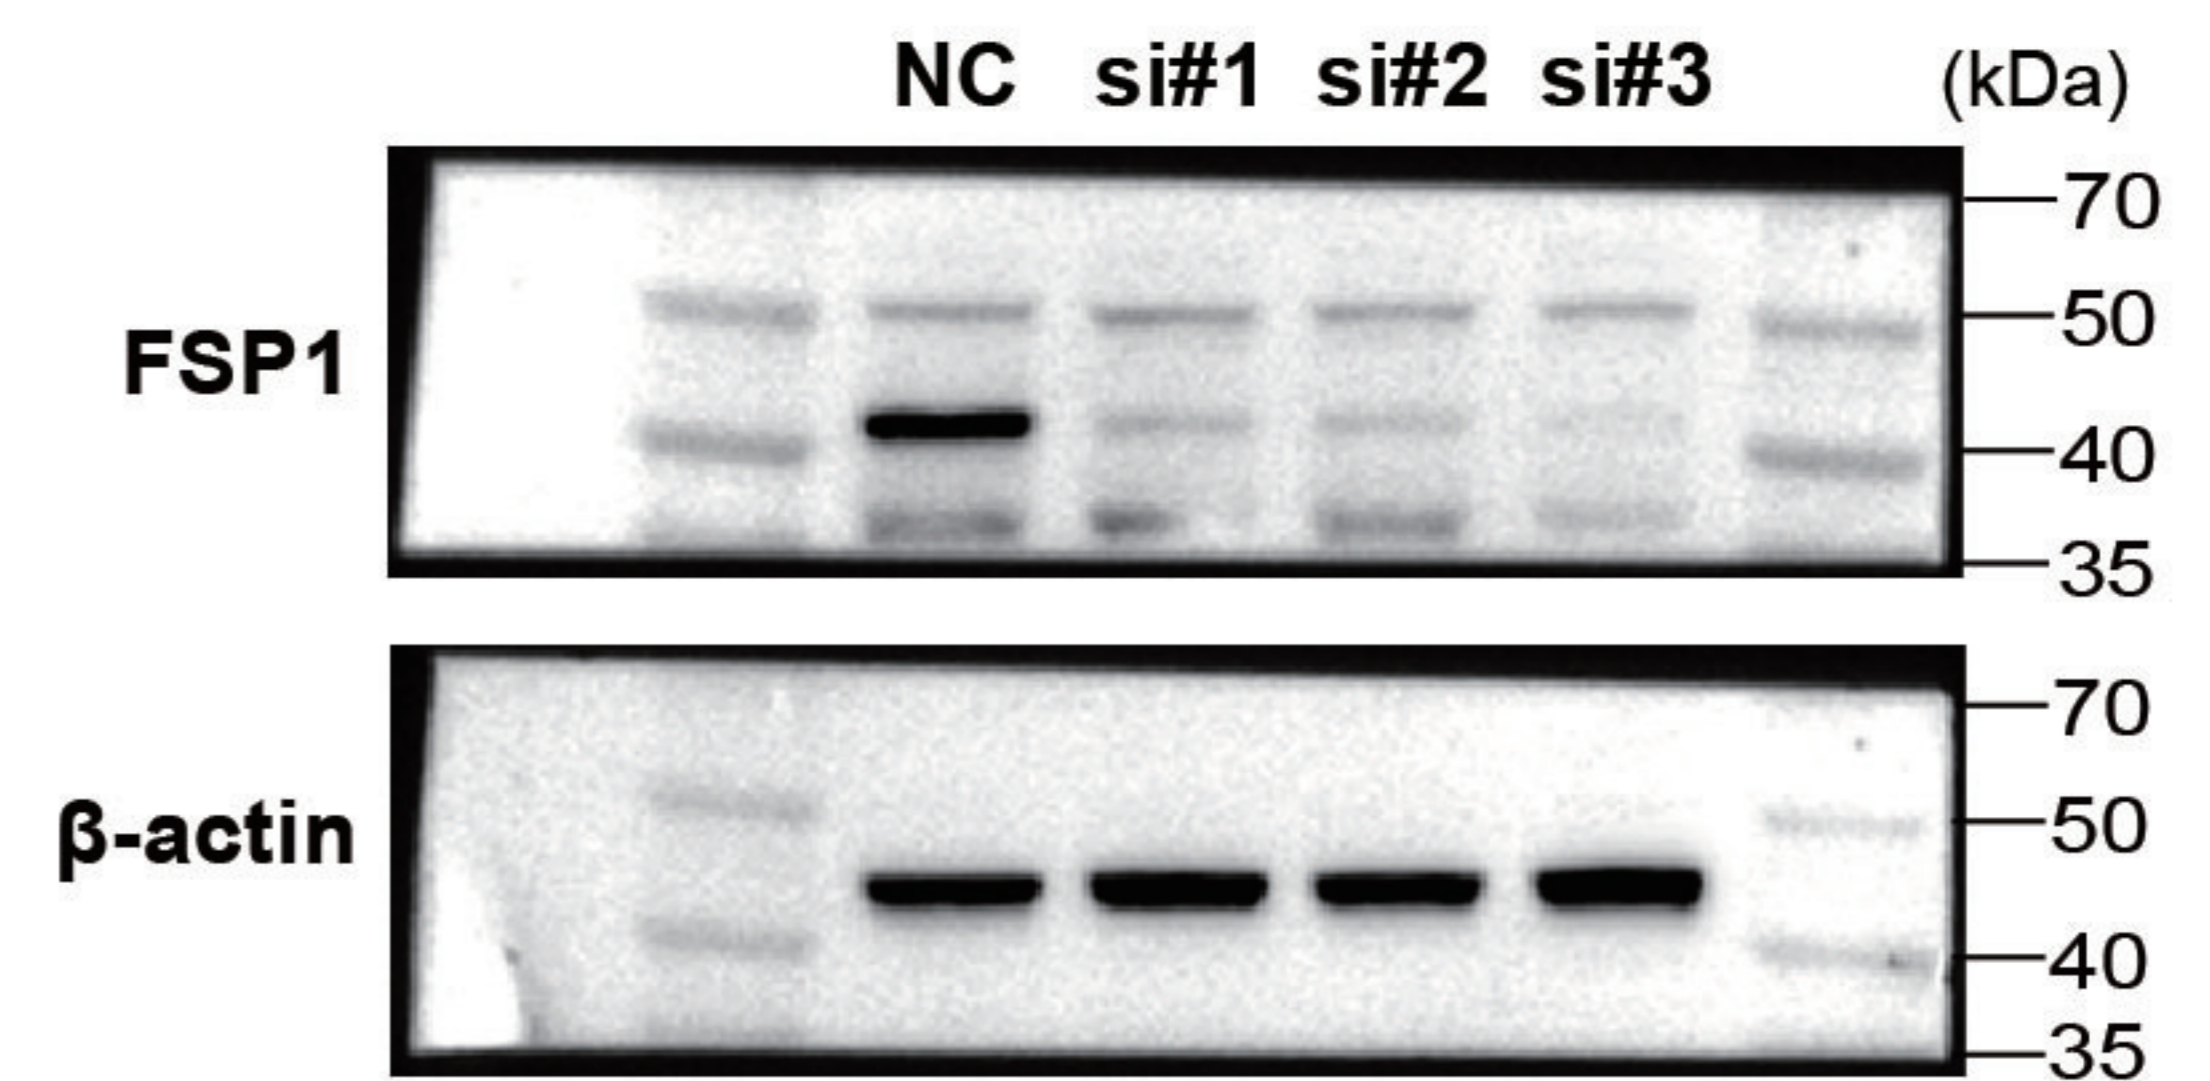**Figure 3A**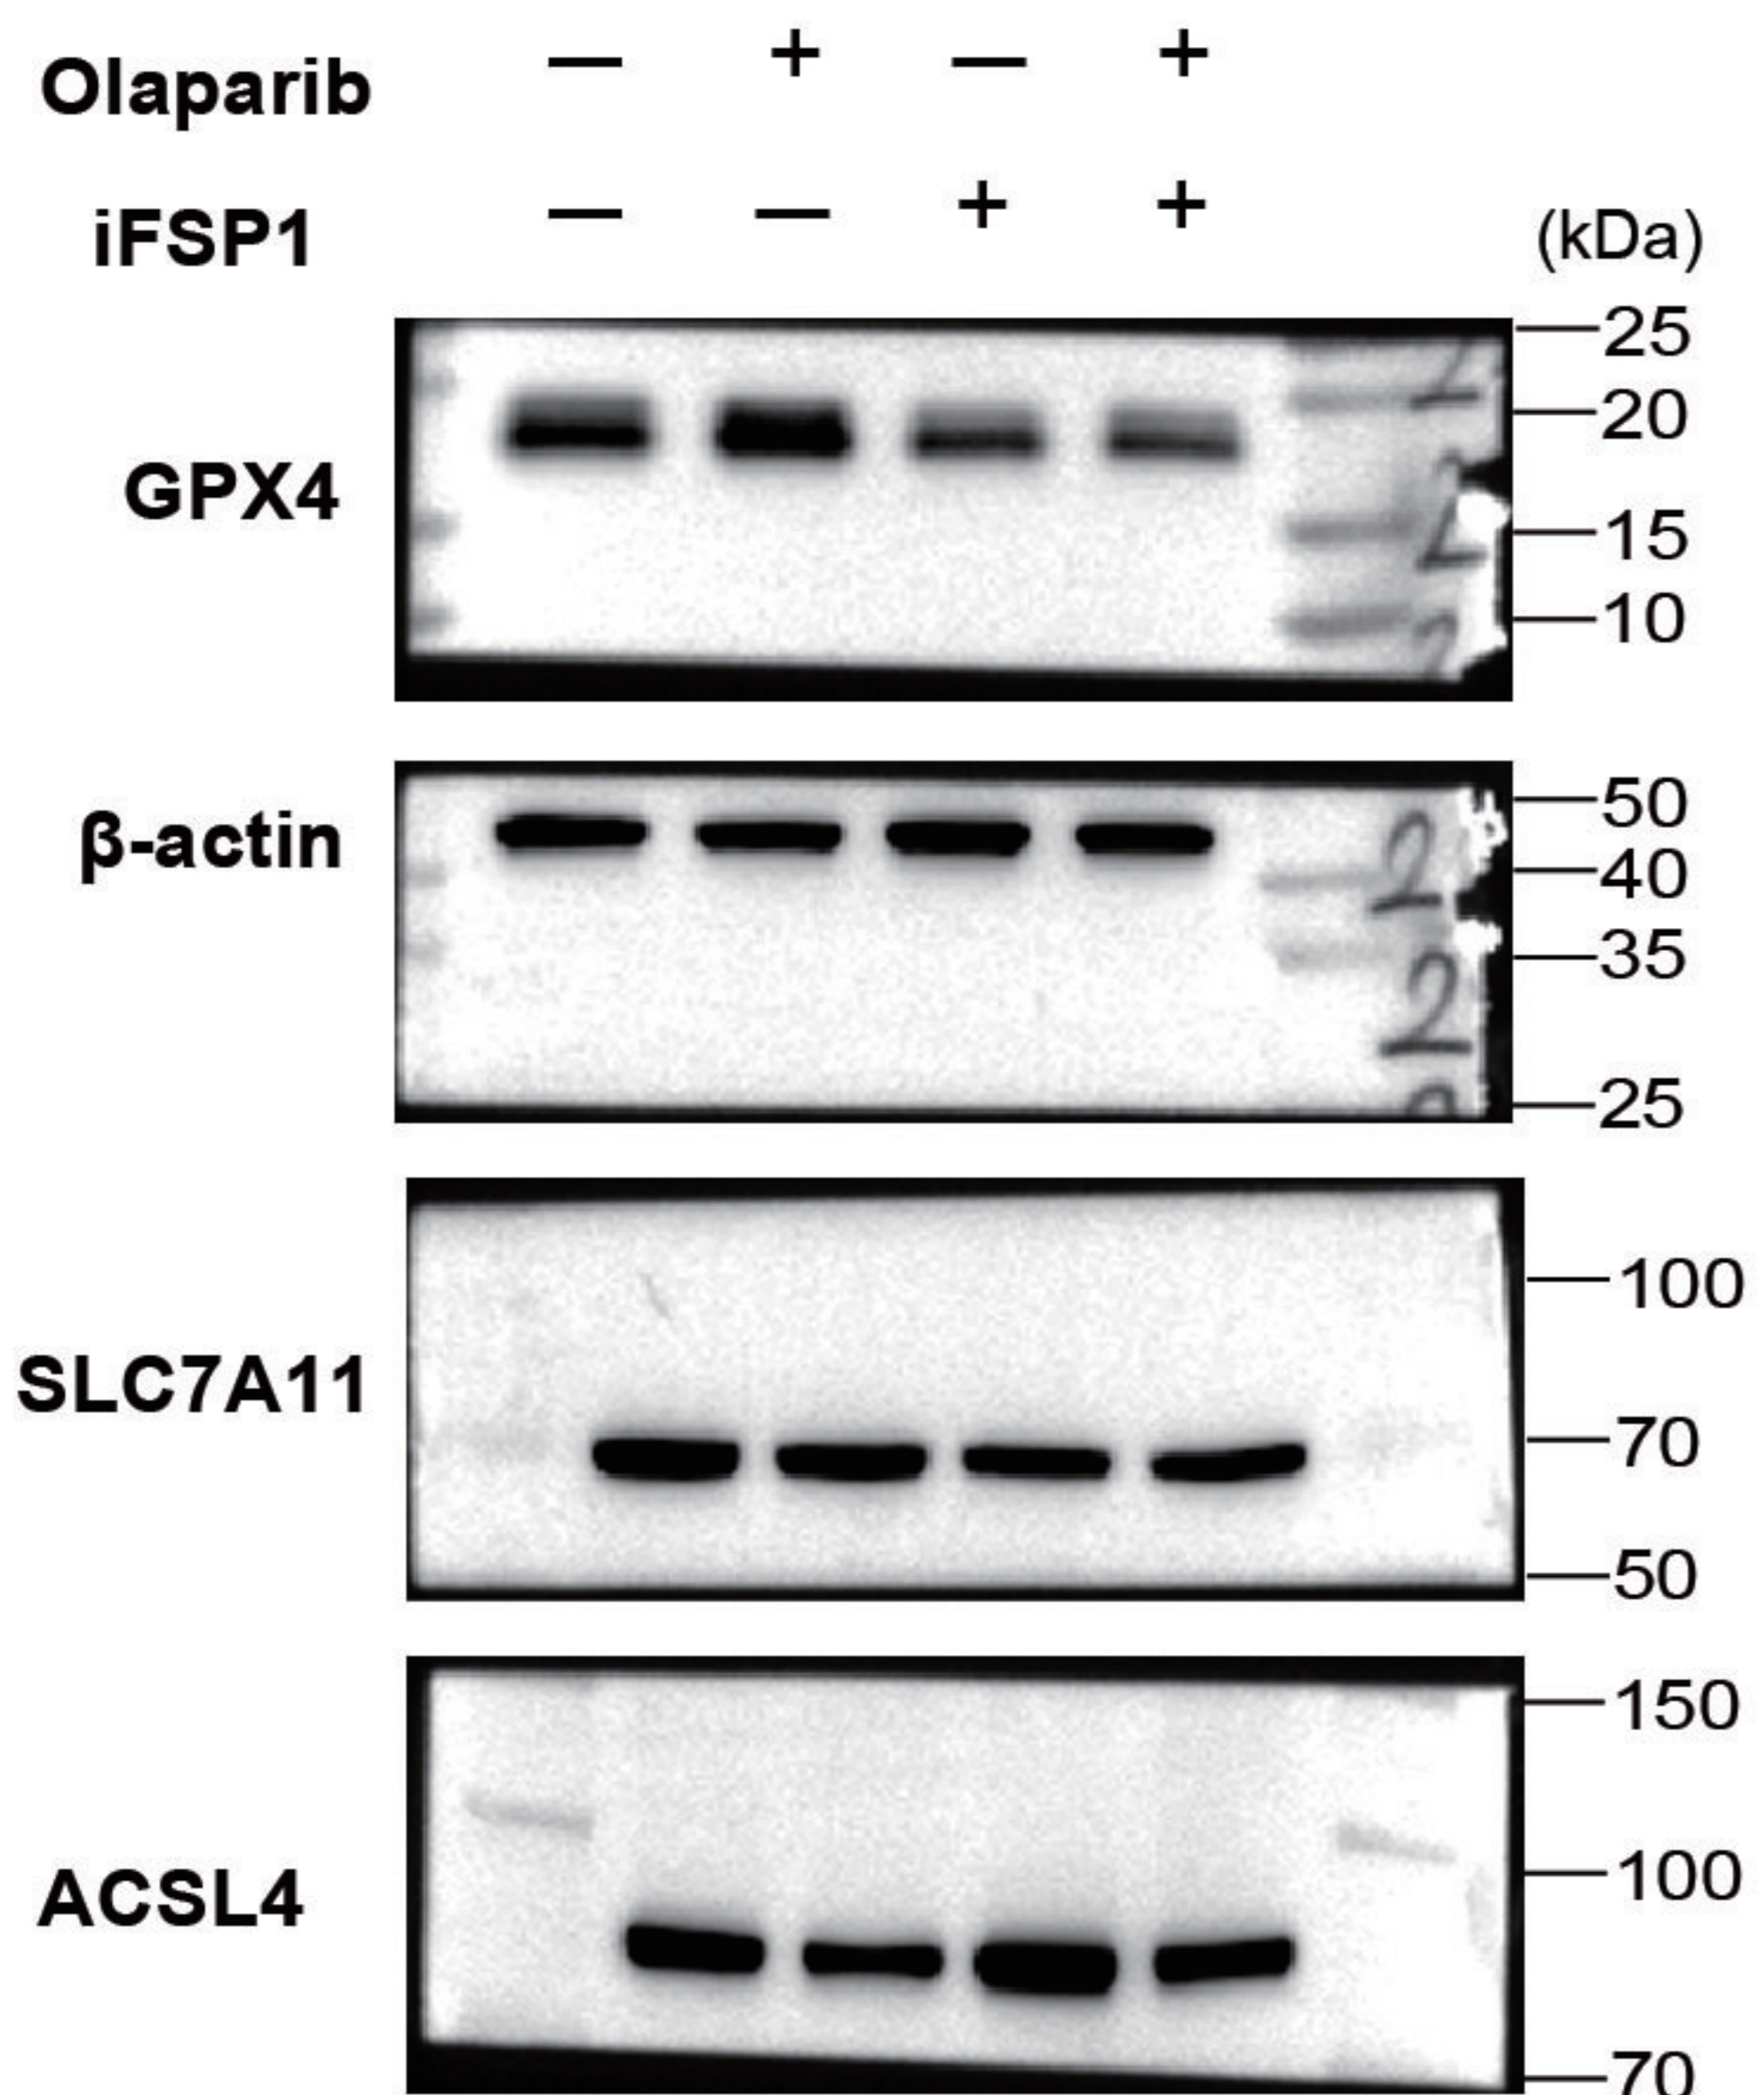**Figure 3B**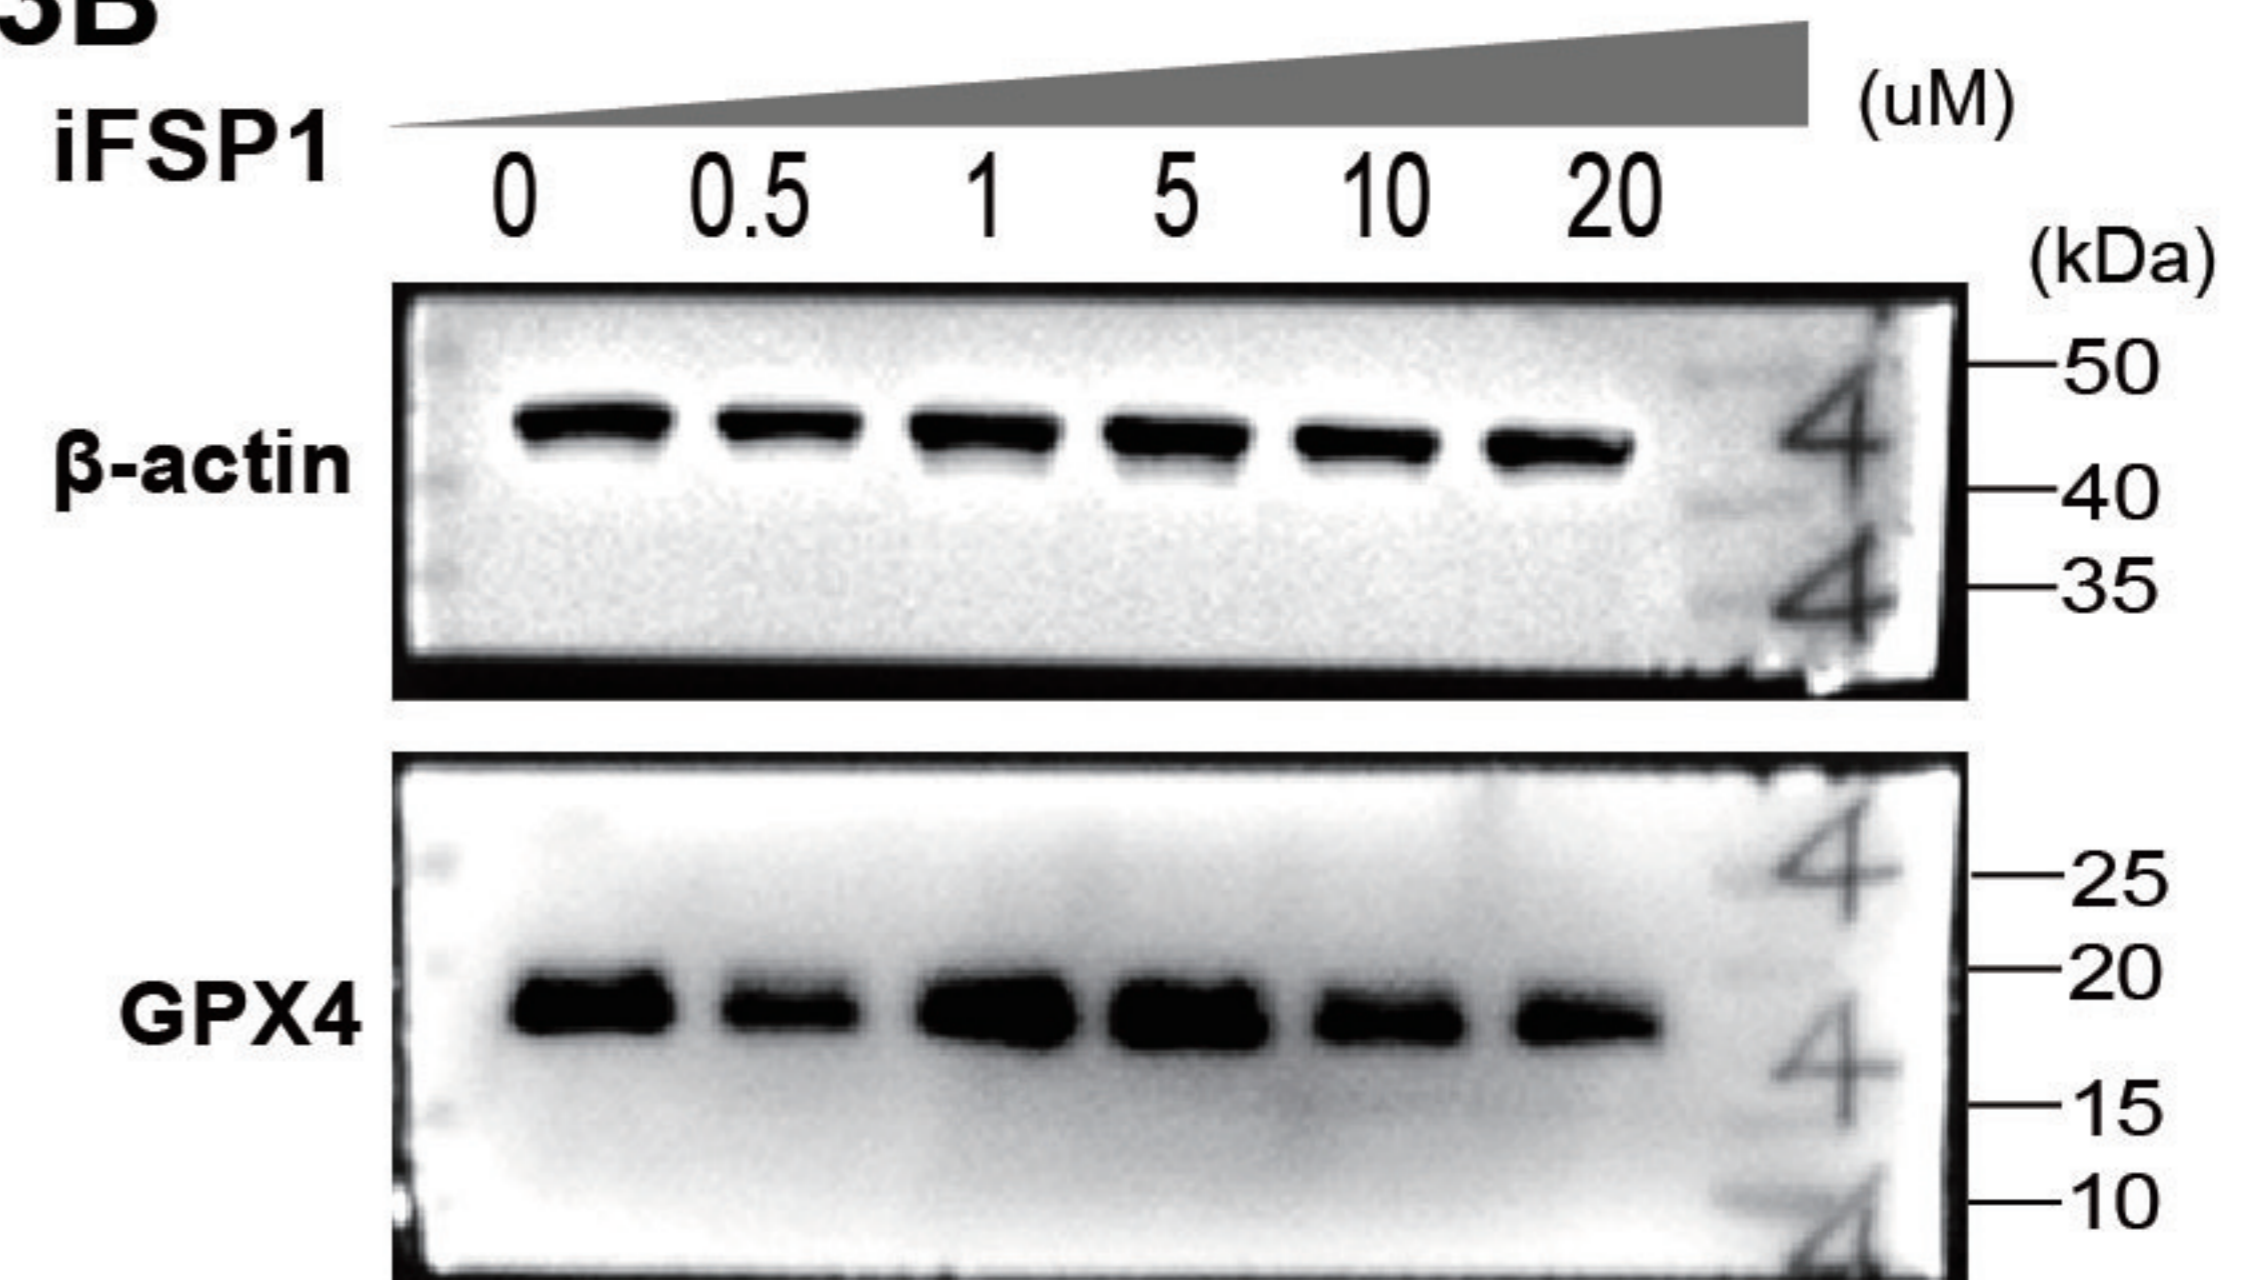**Figure 5A**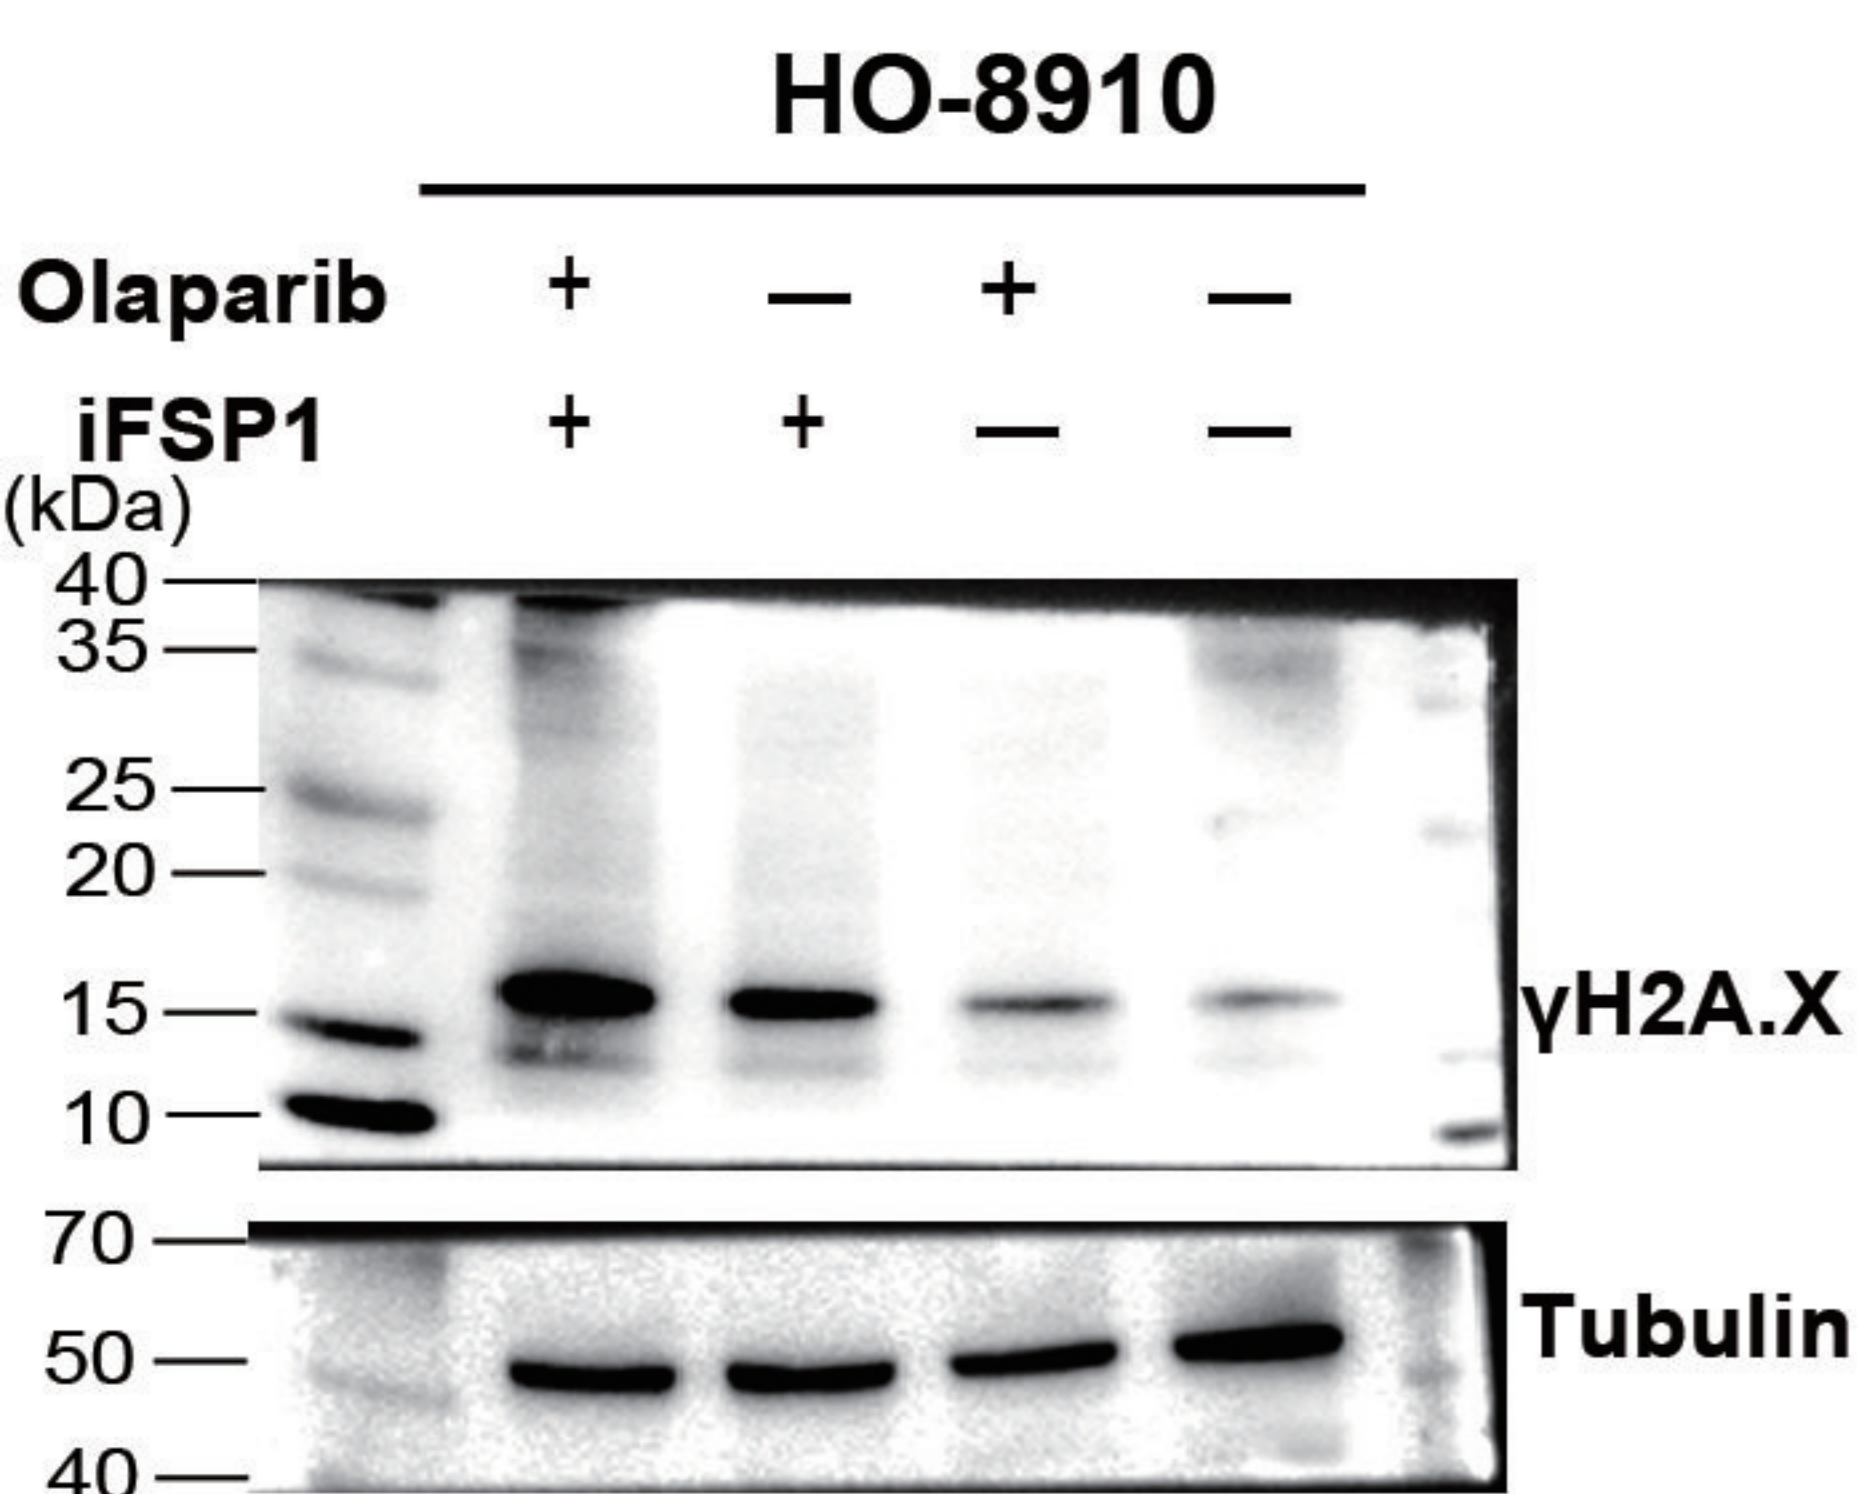**Figure 5E**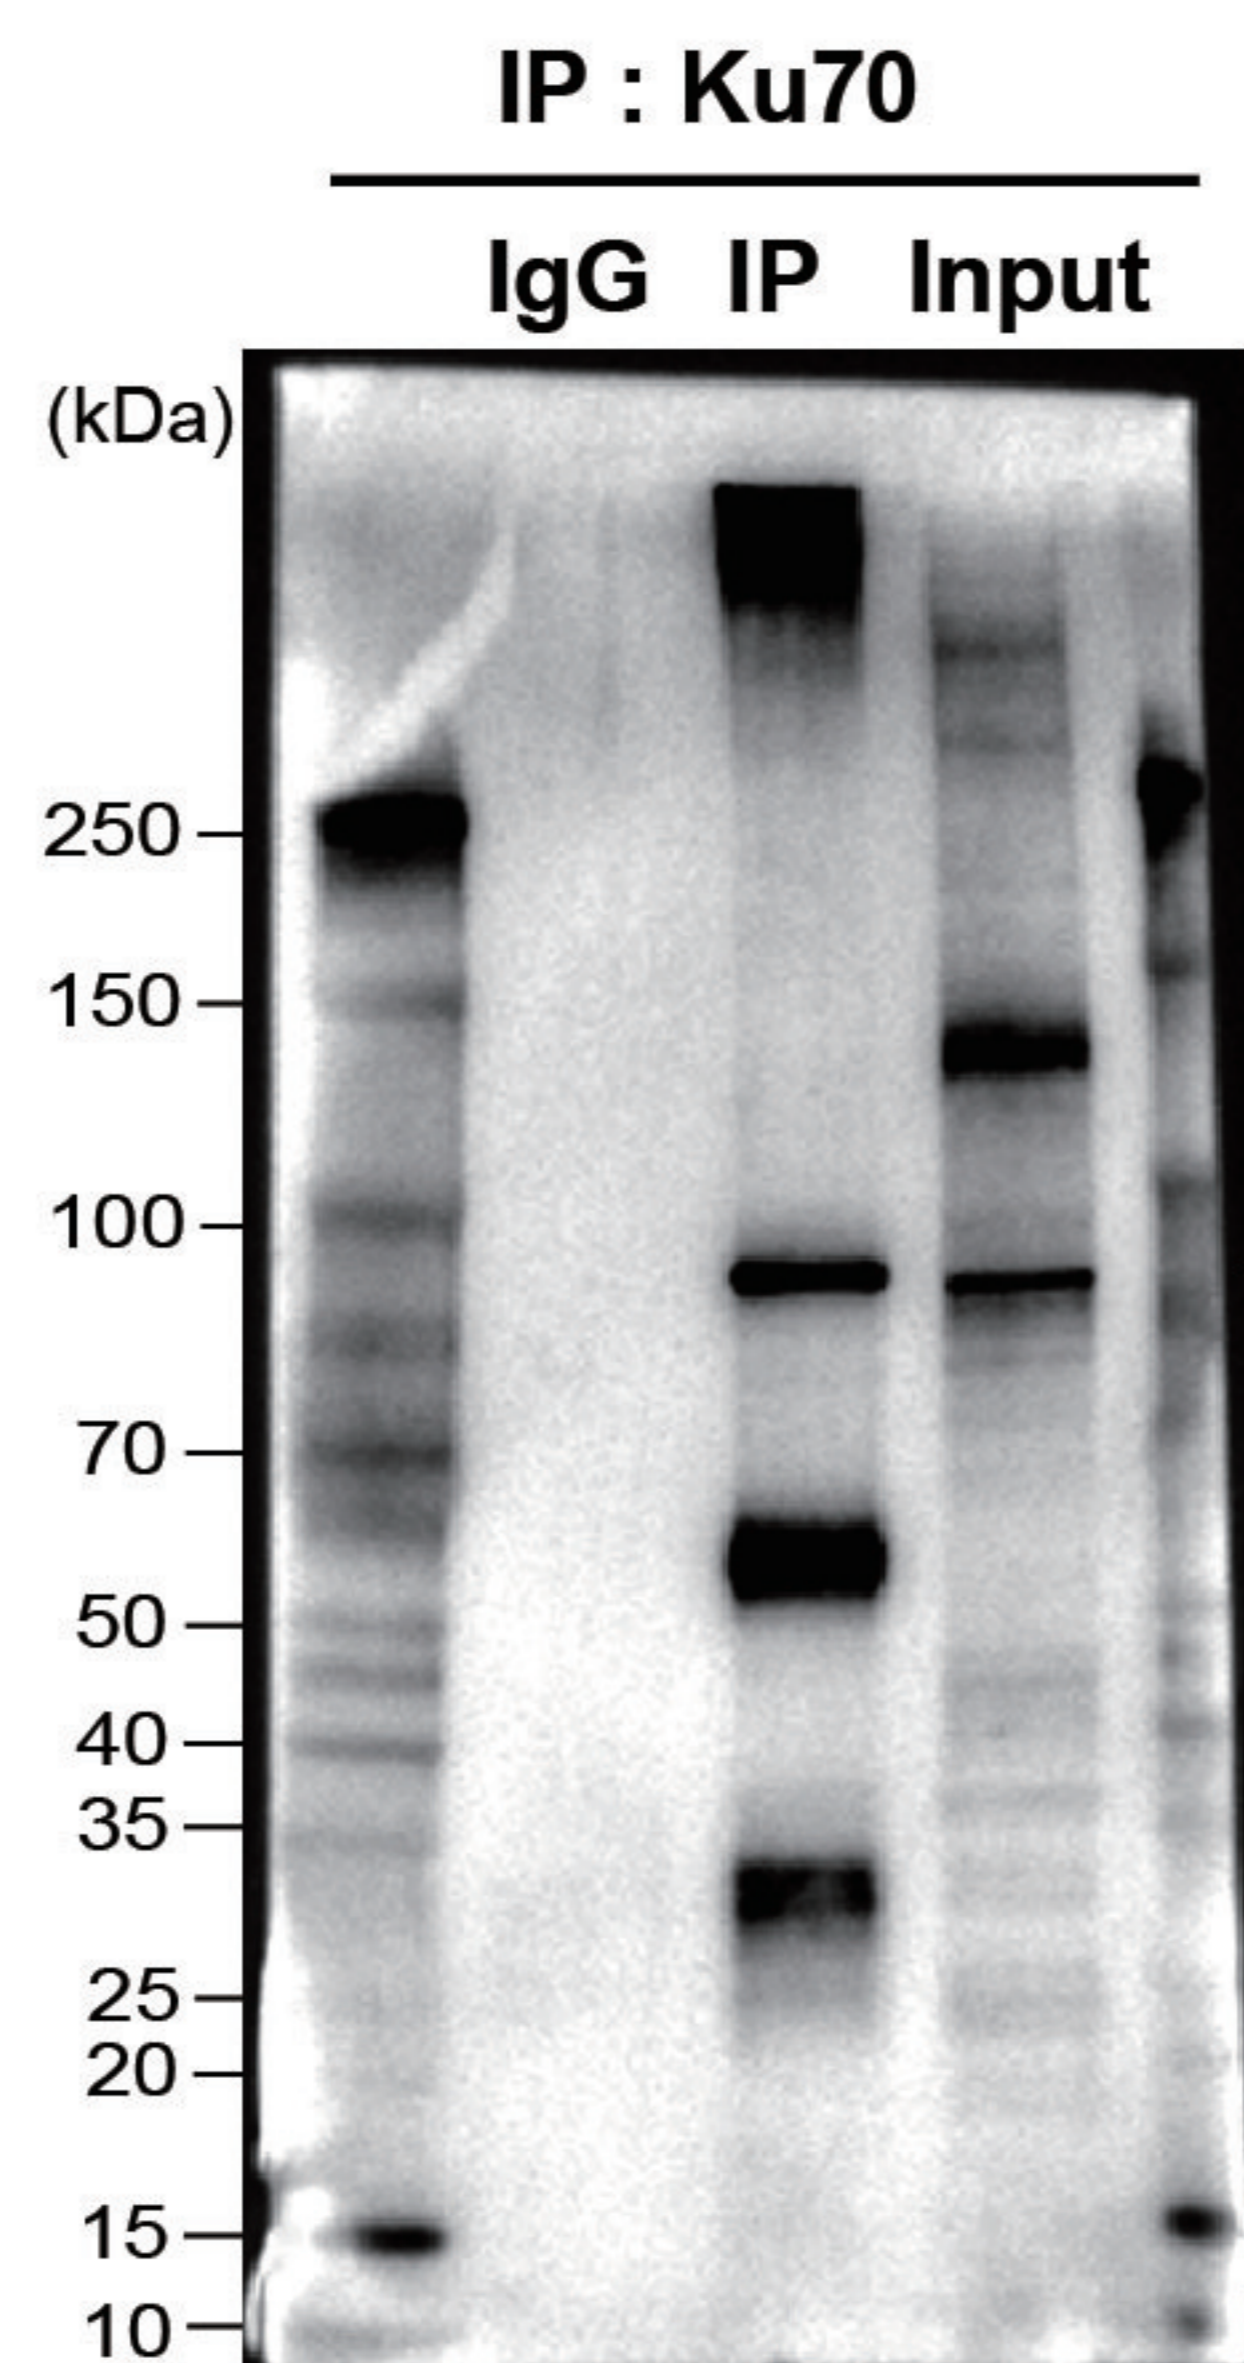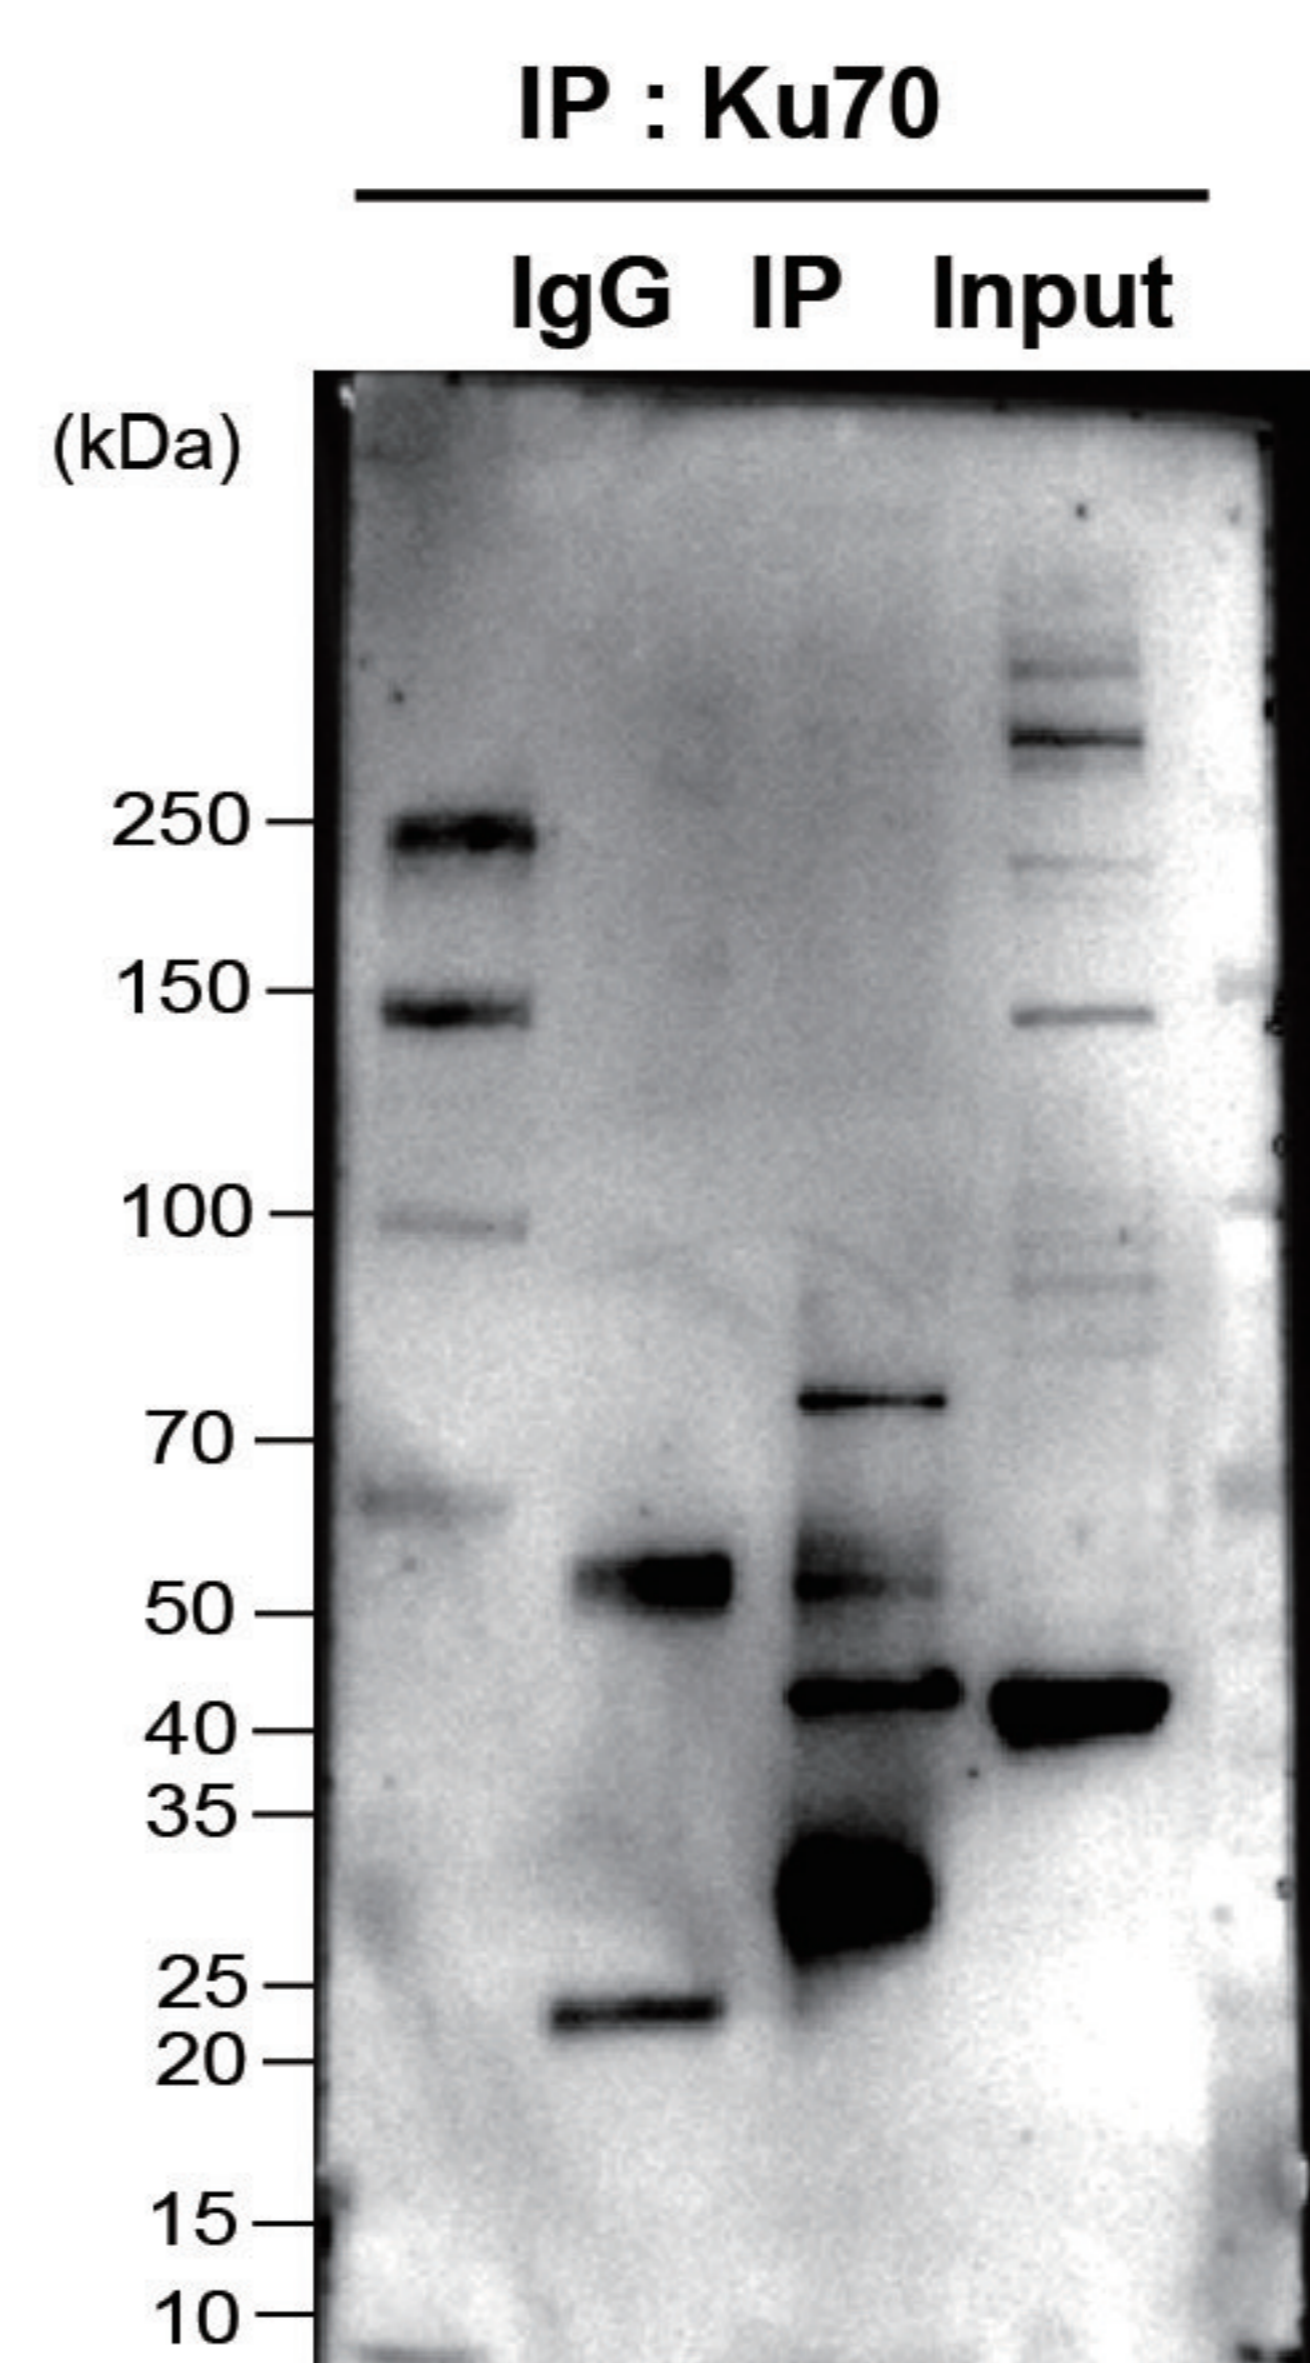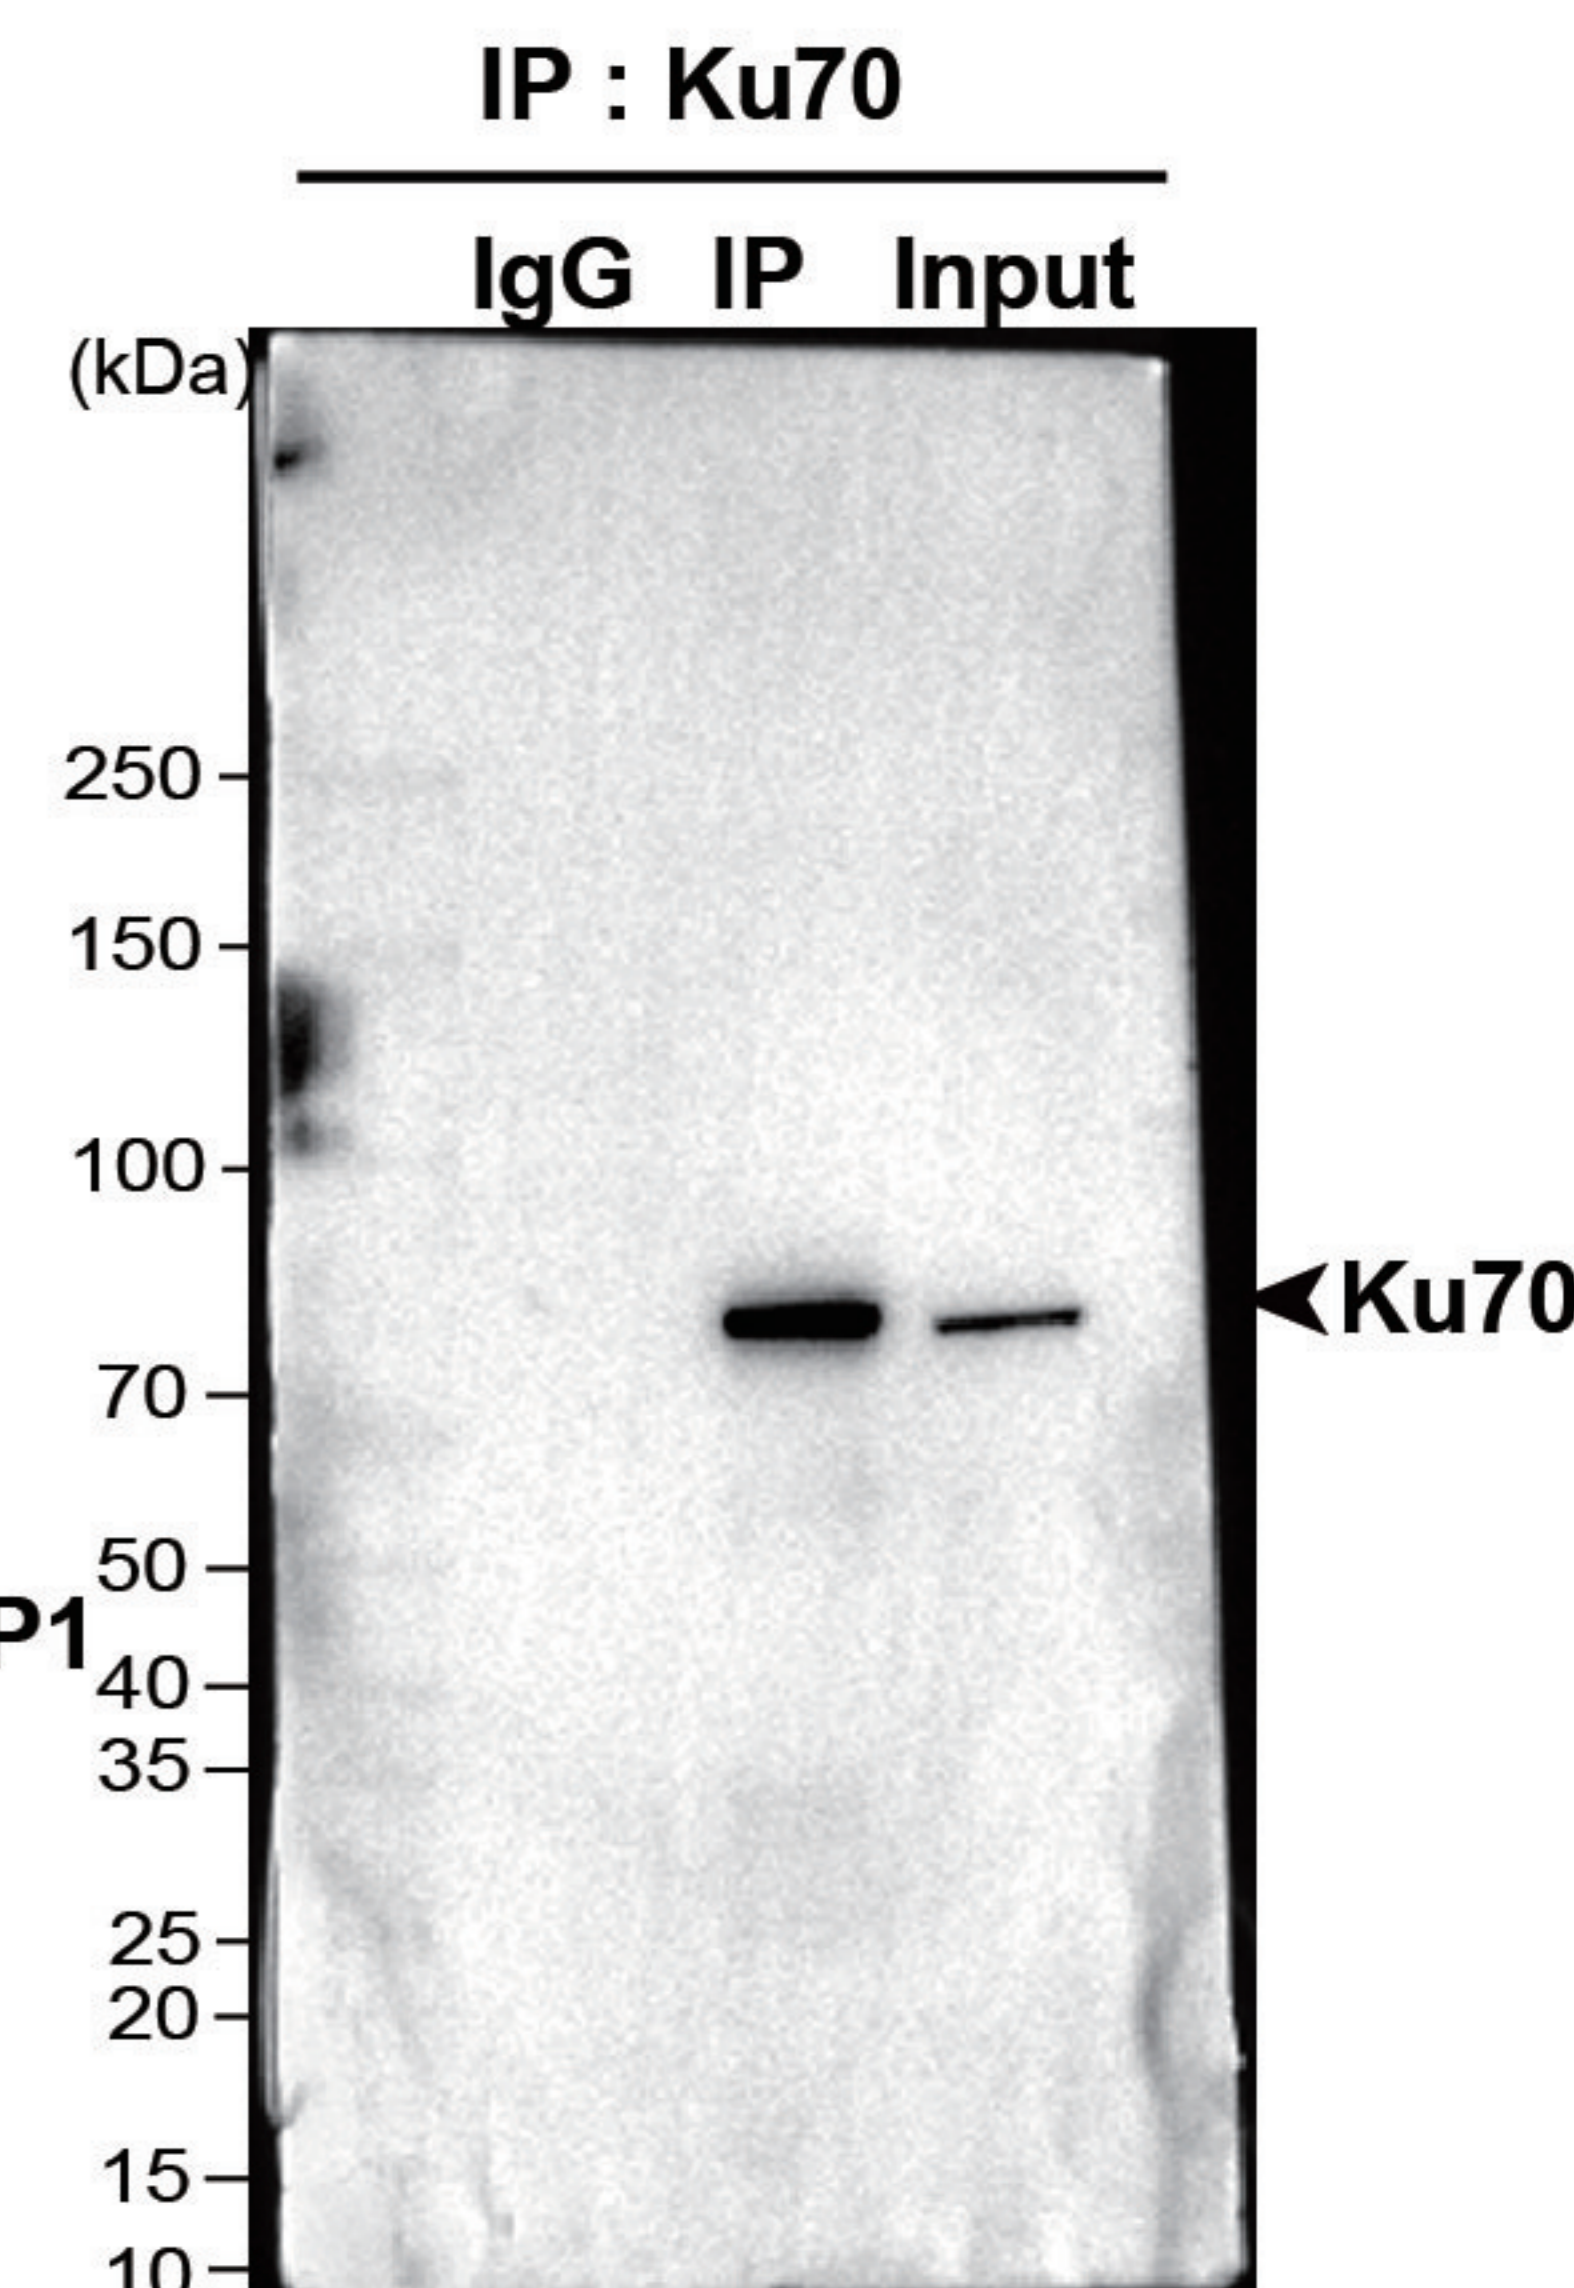

**Figure 5F**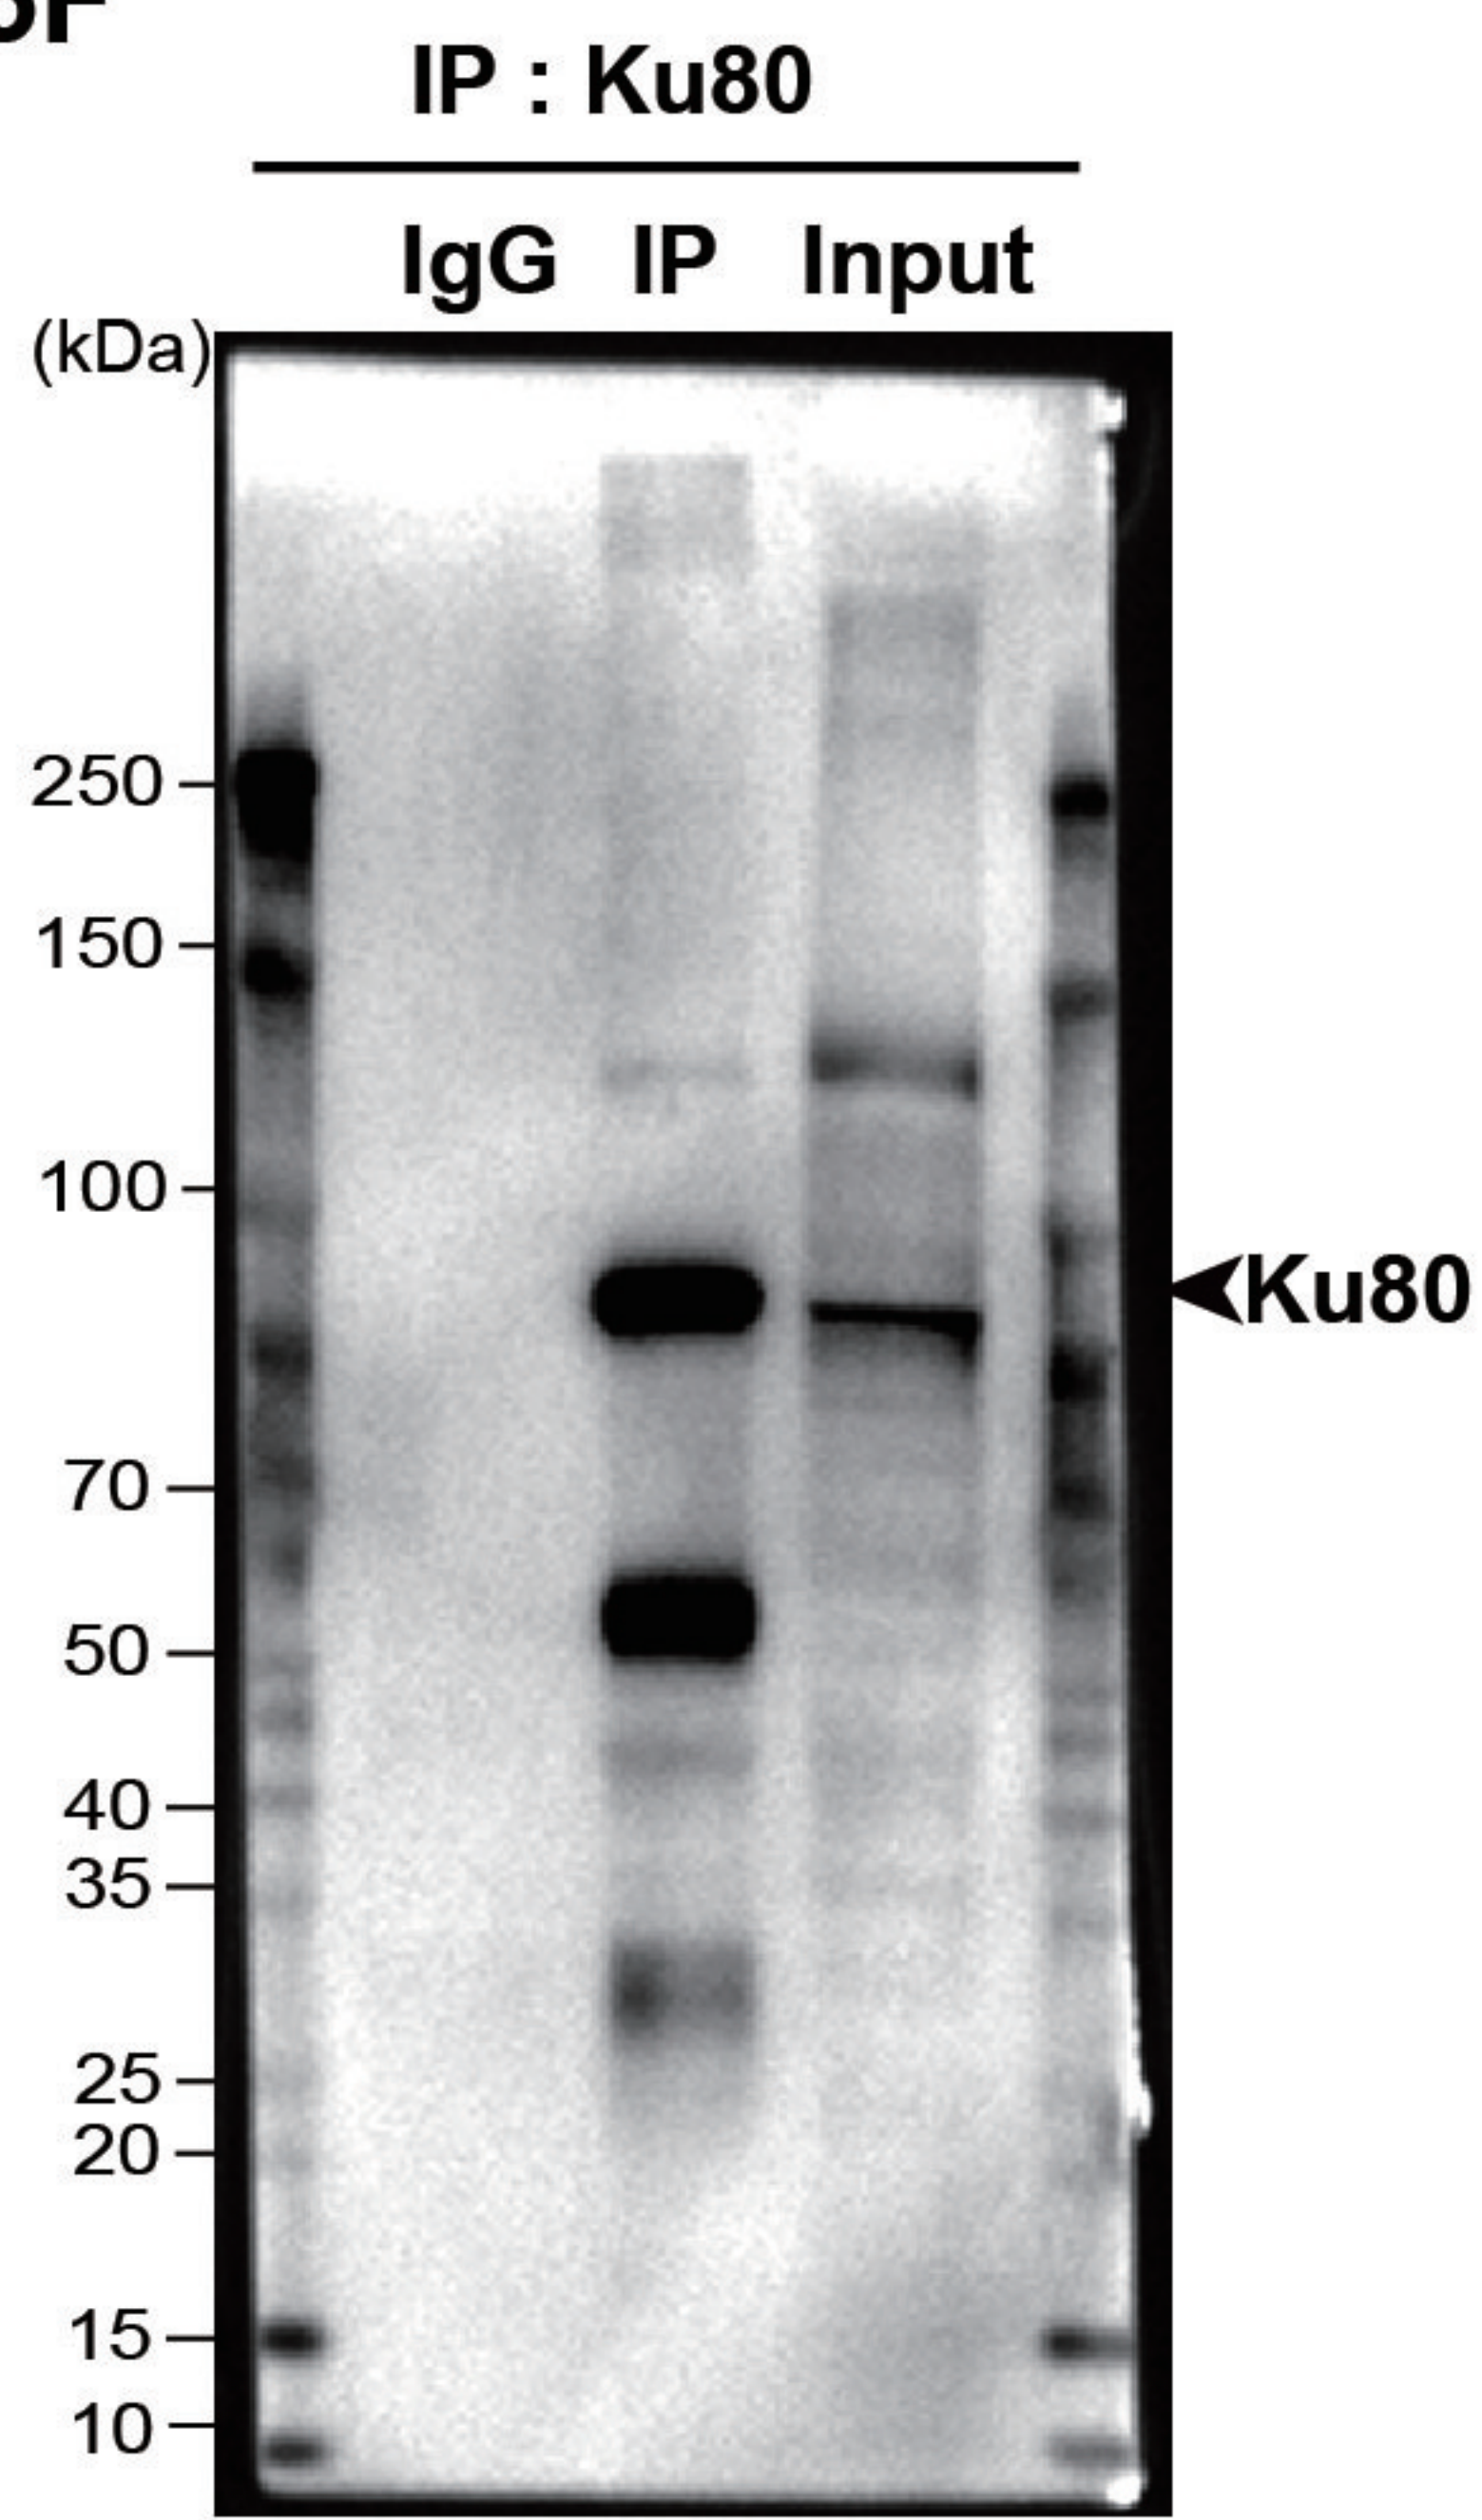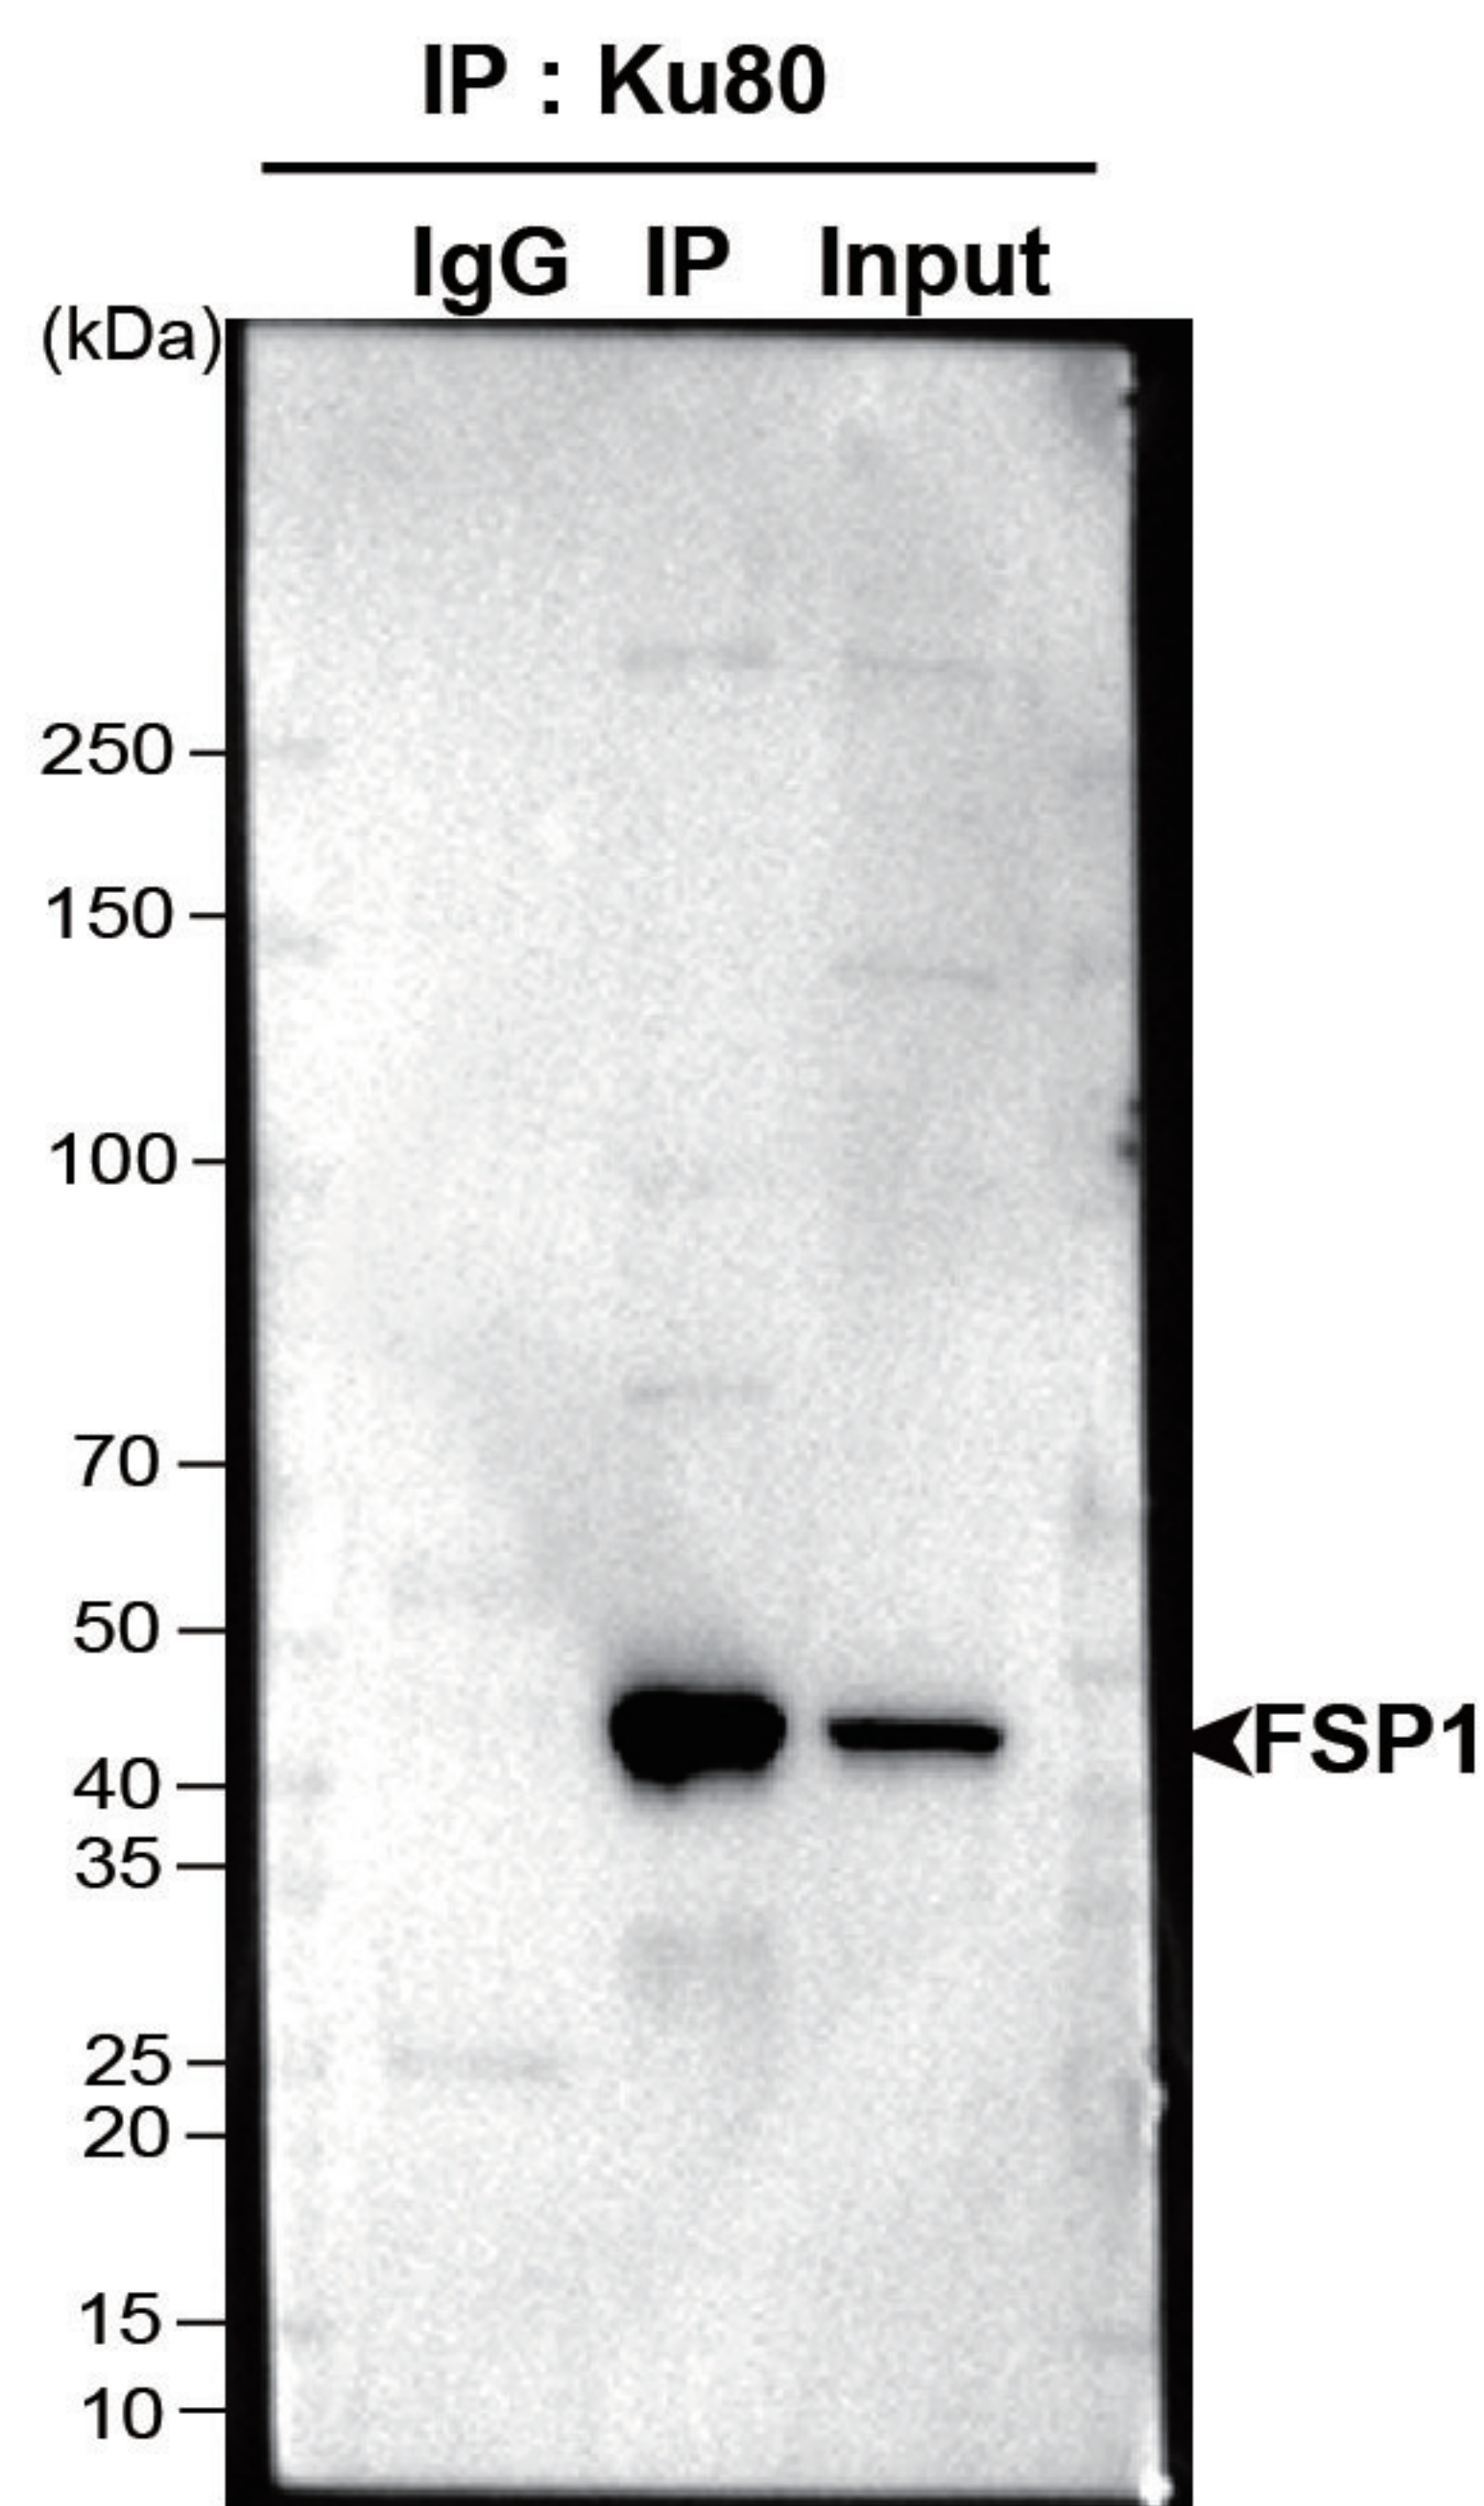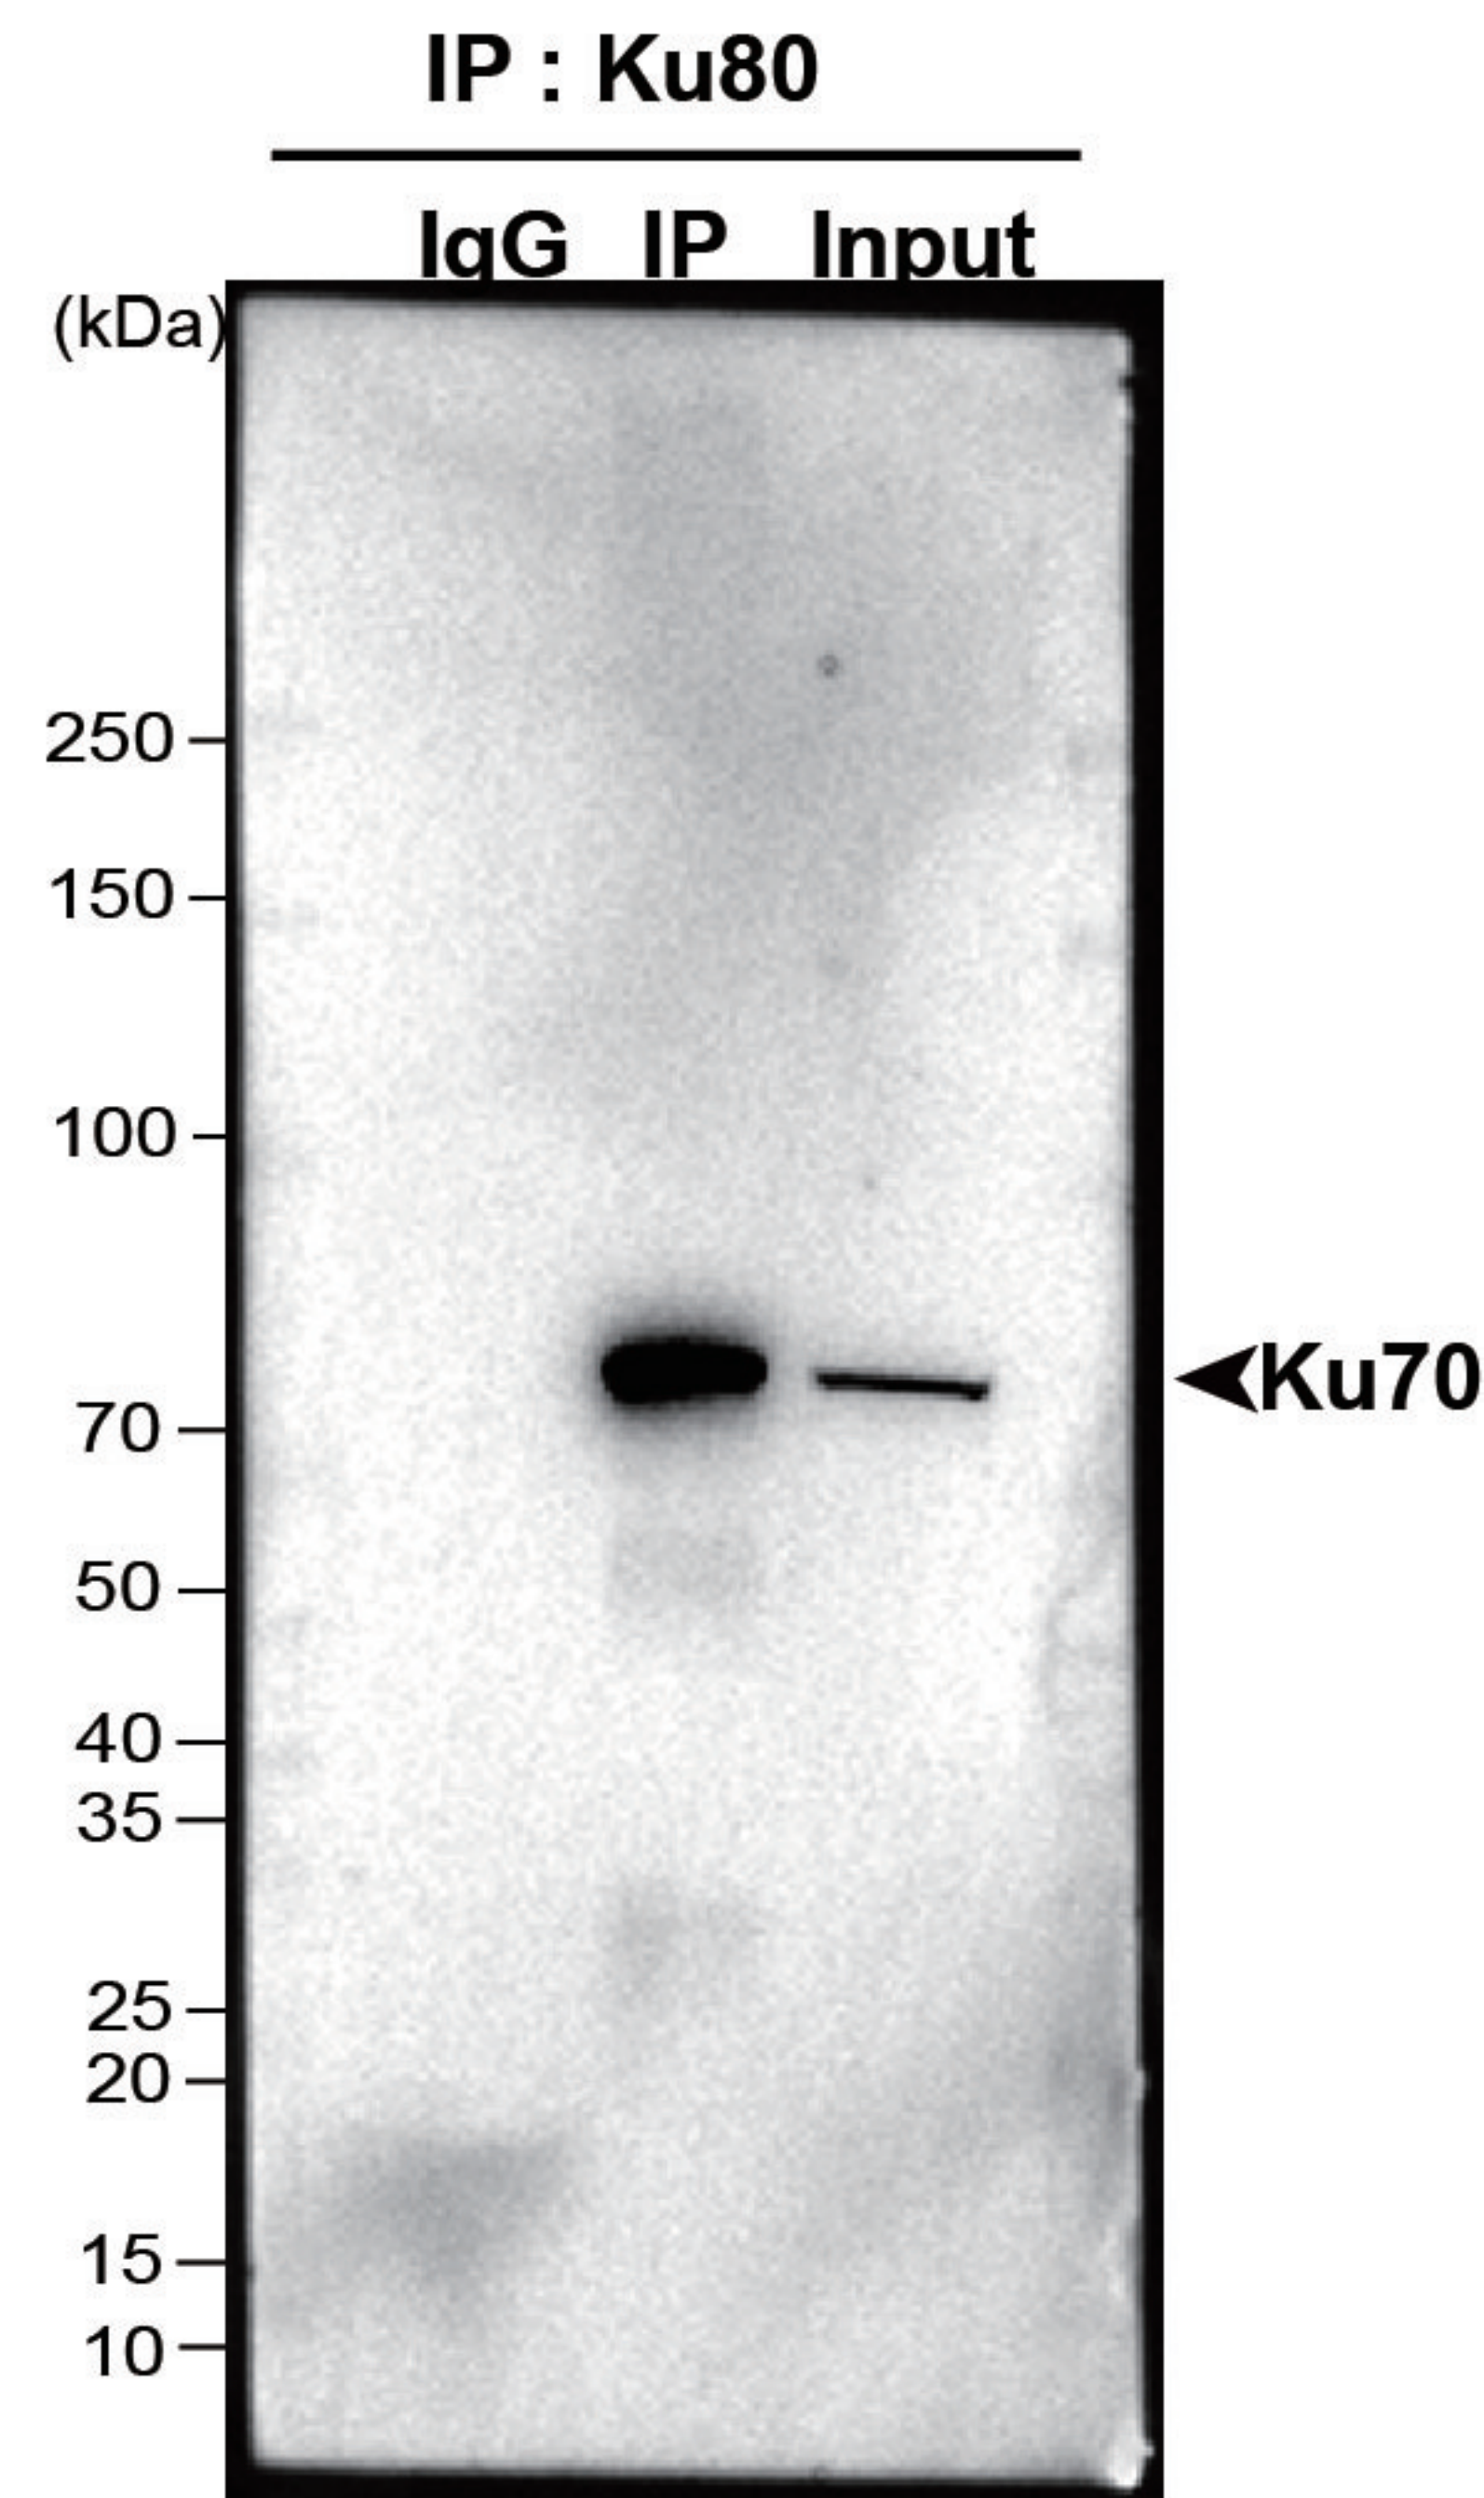**Figure 5G**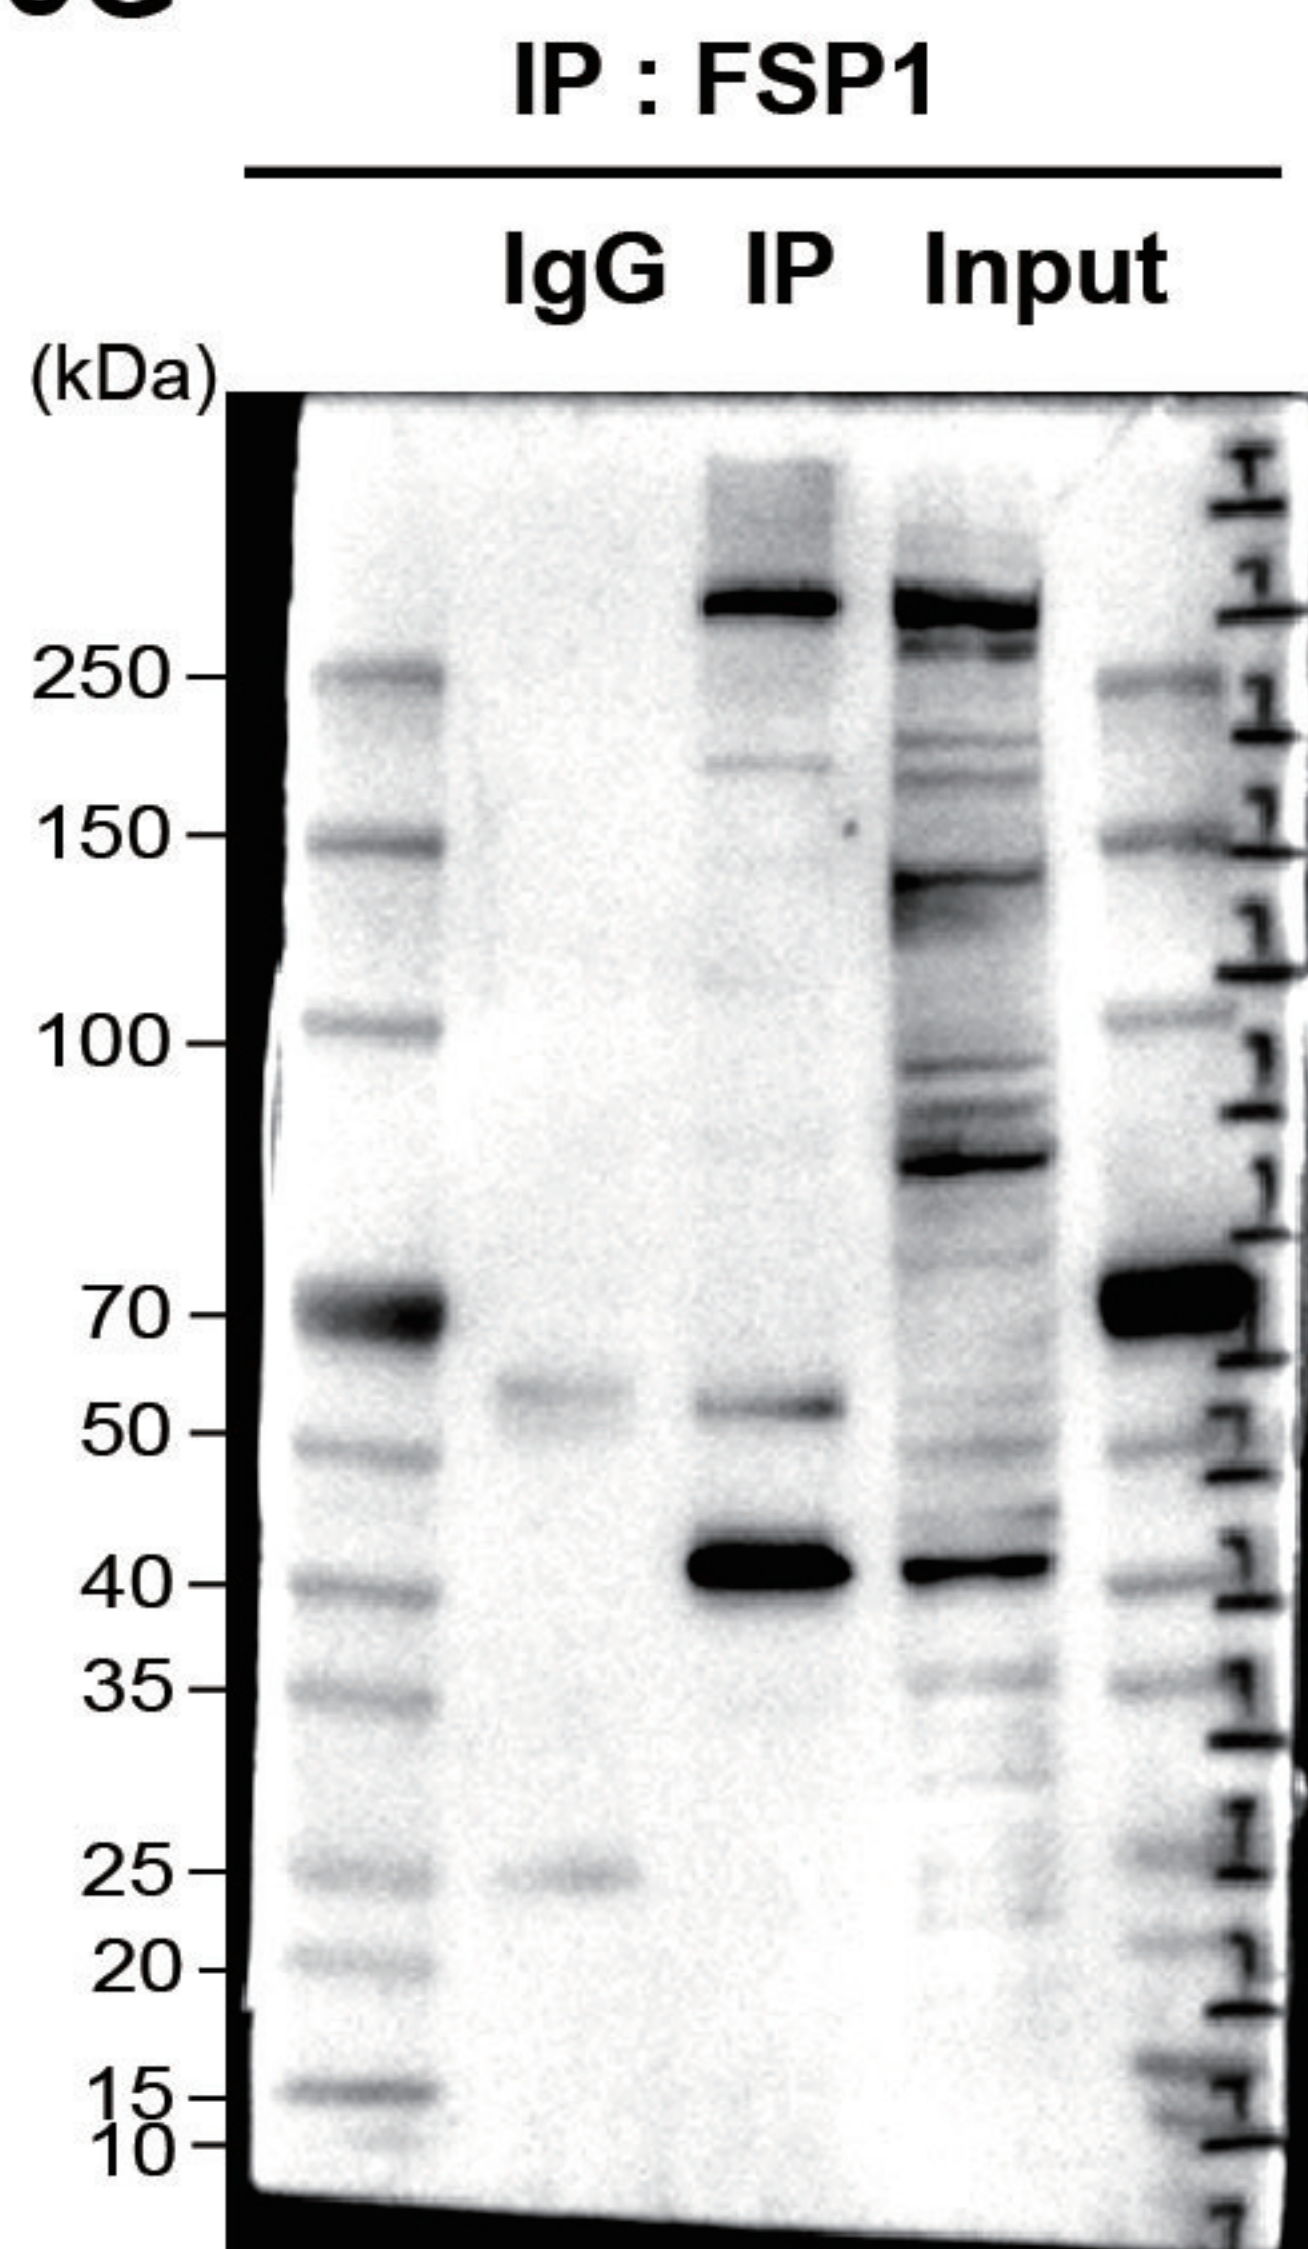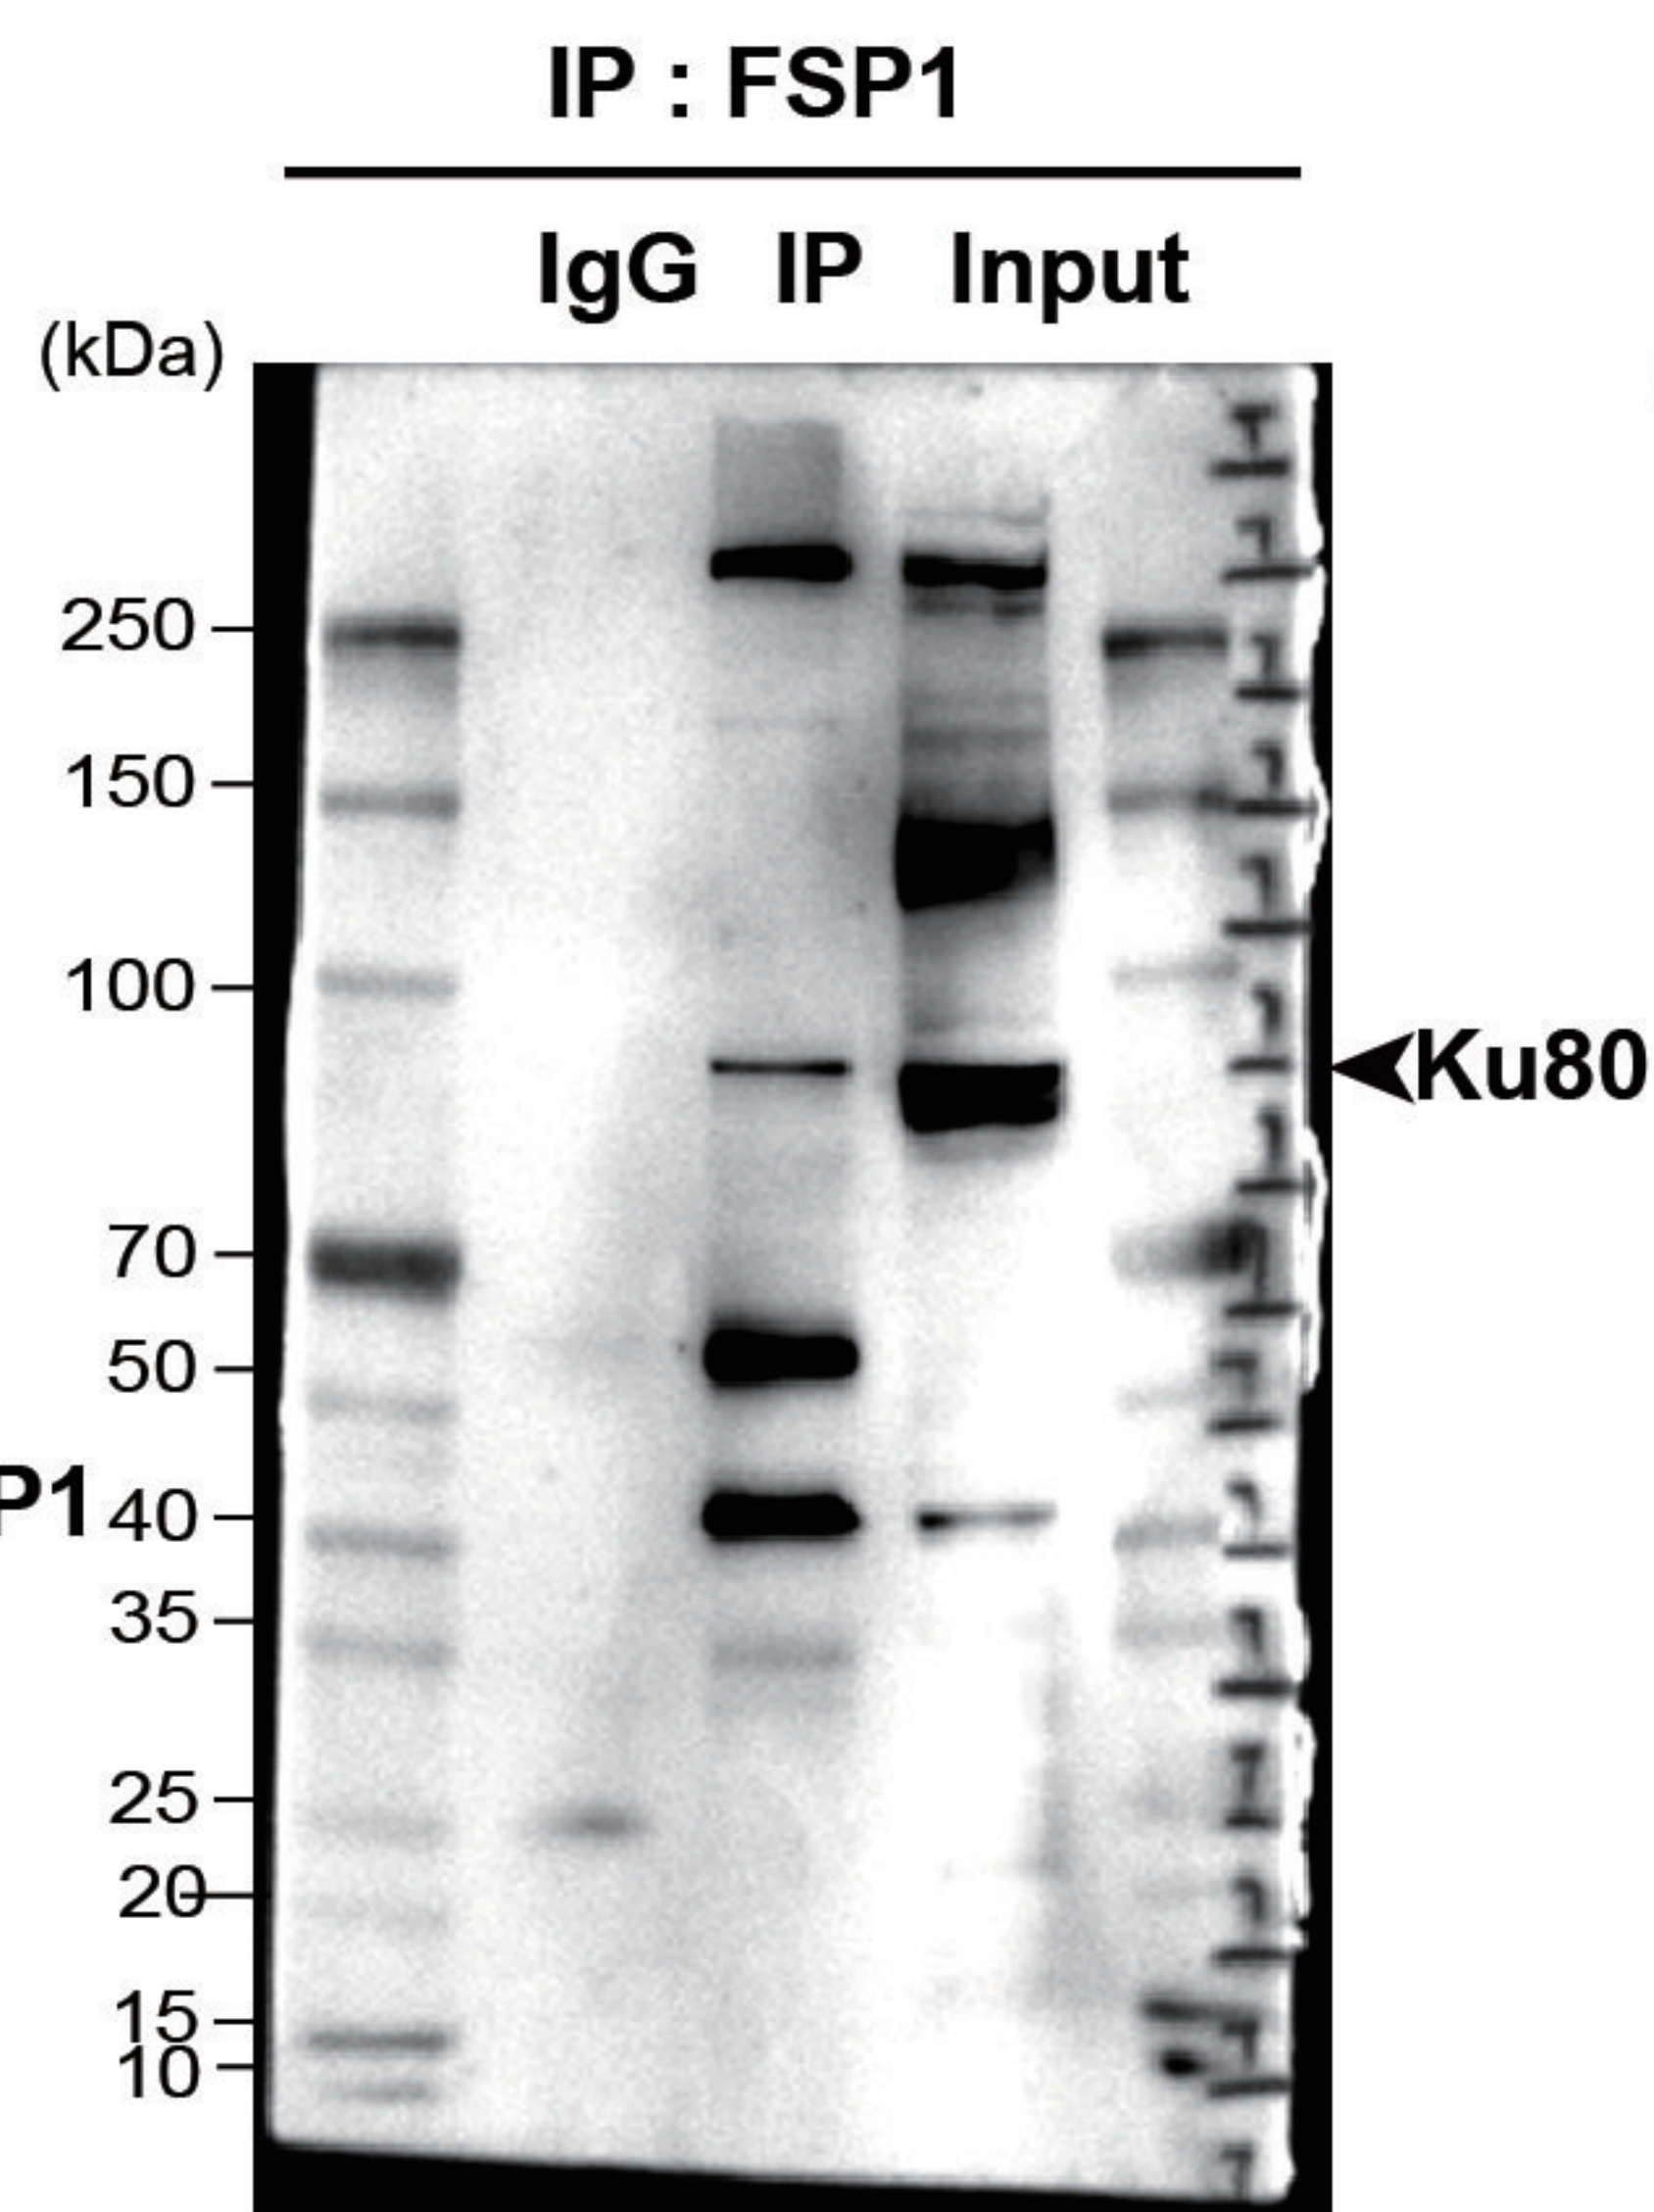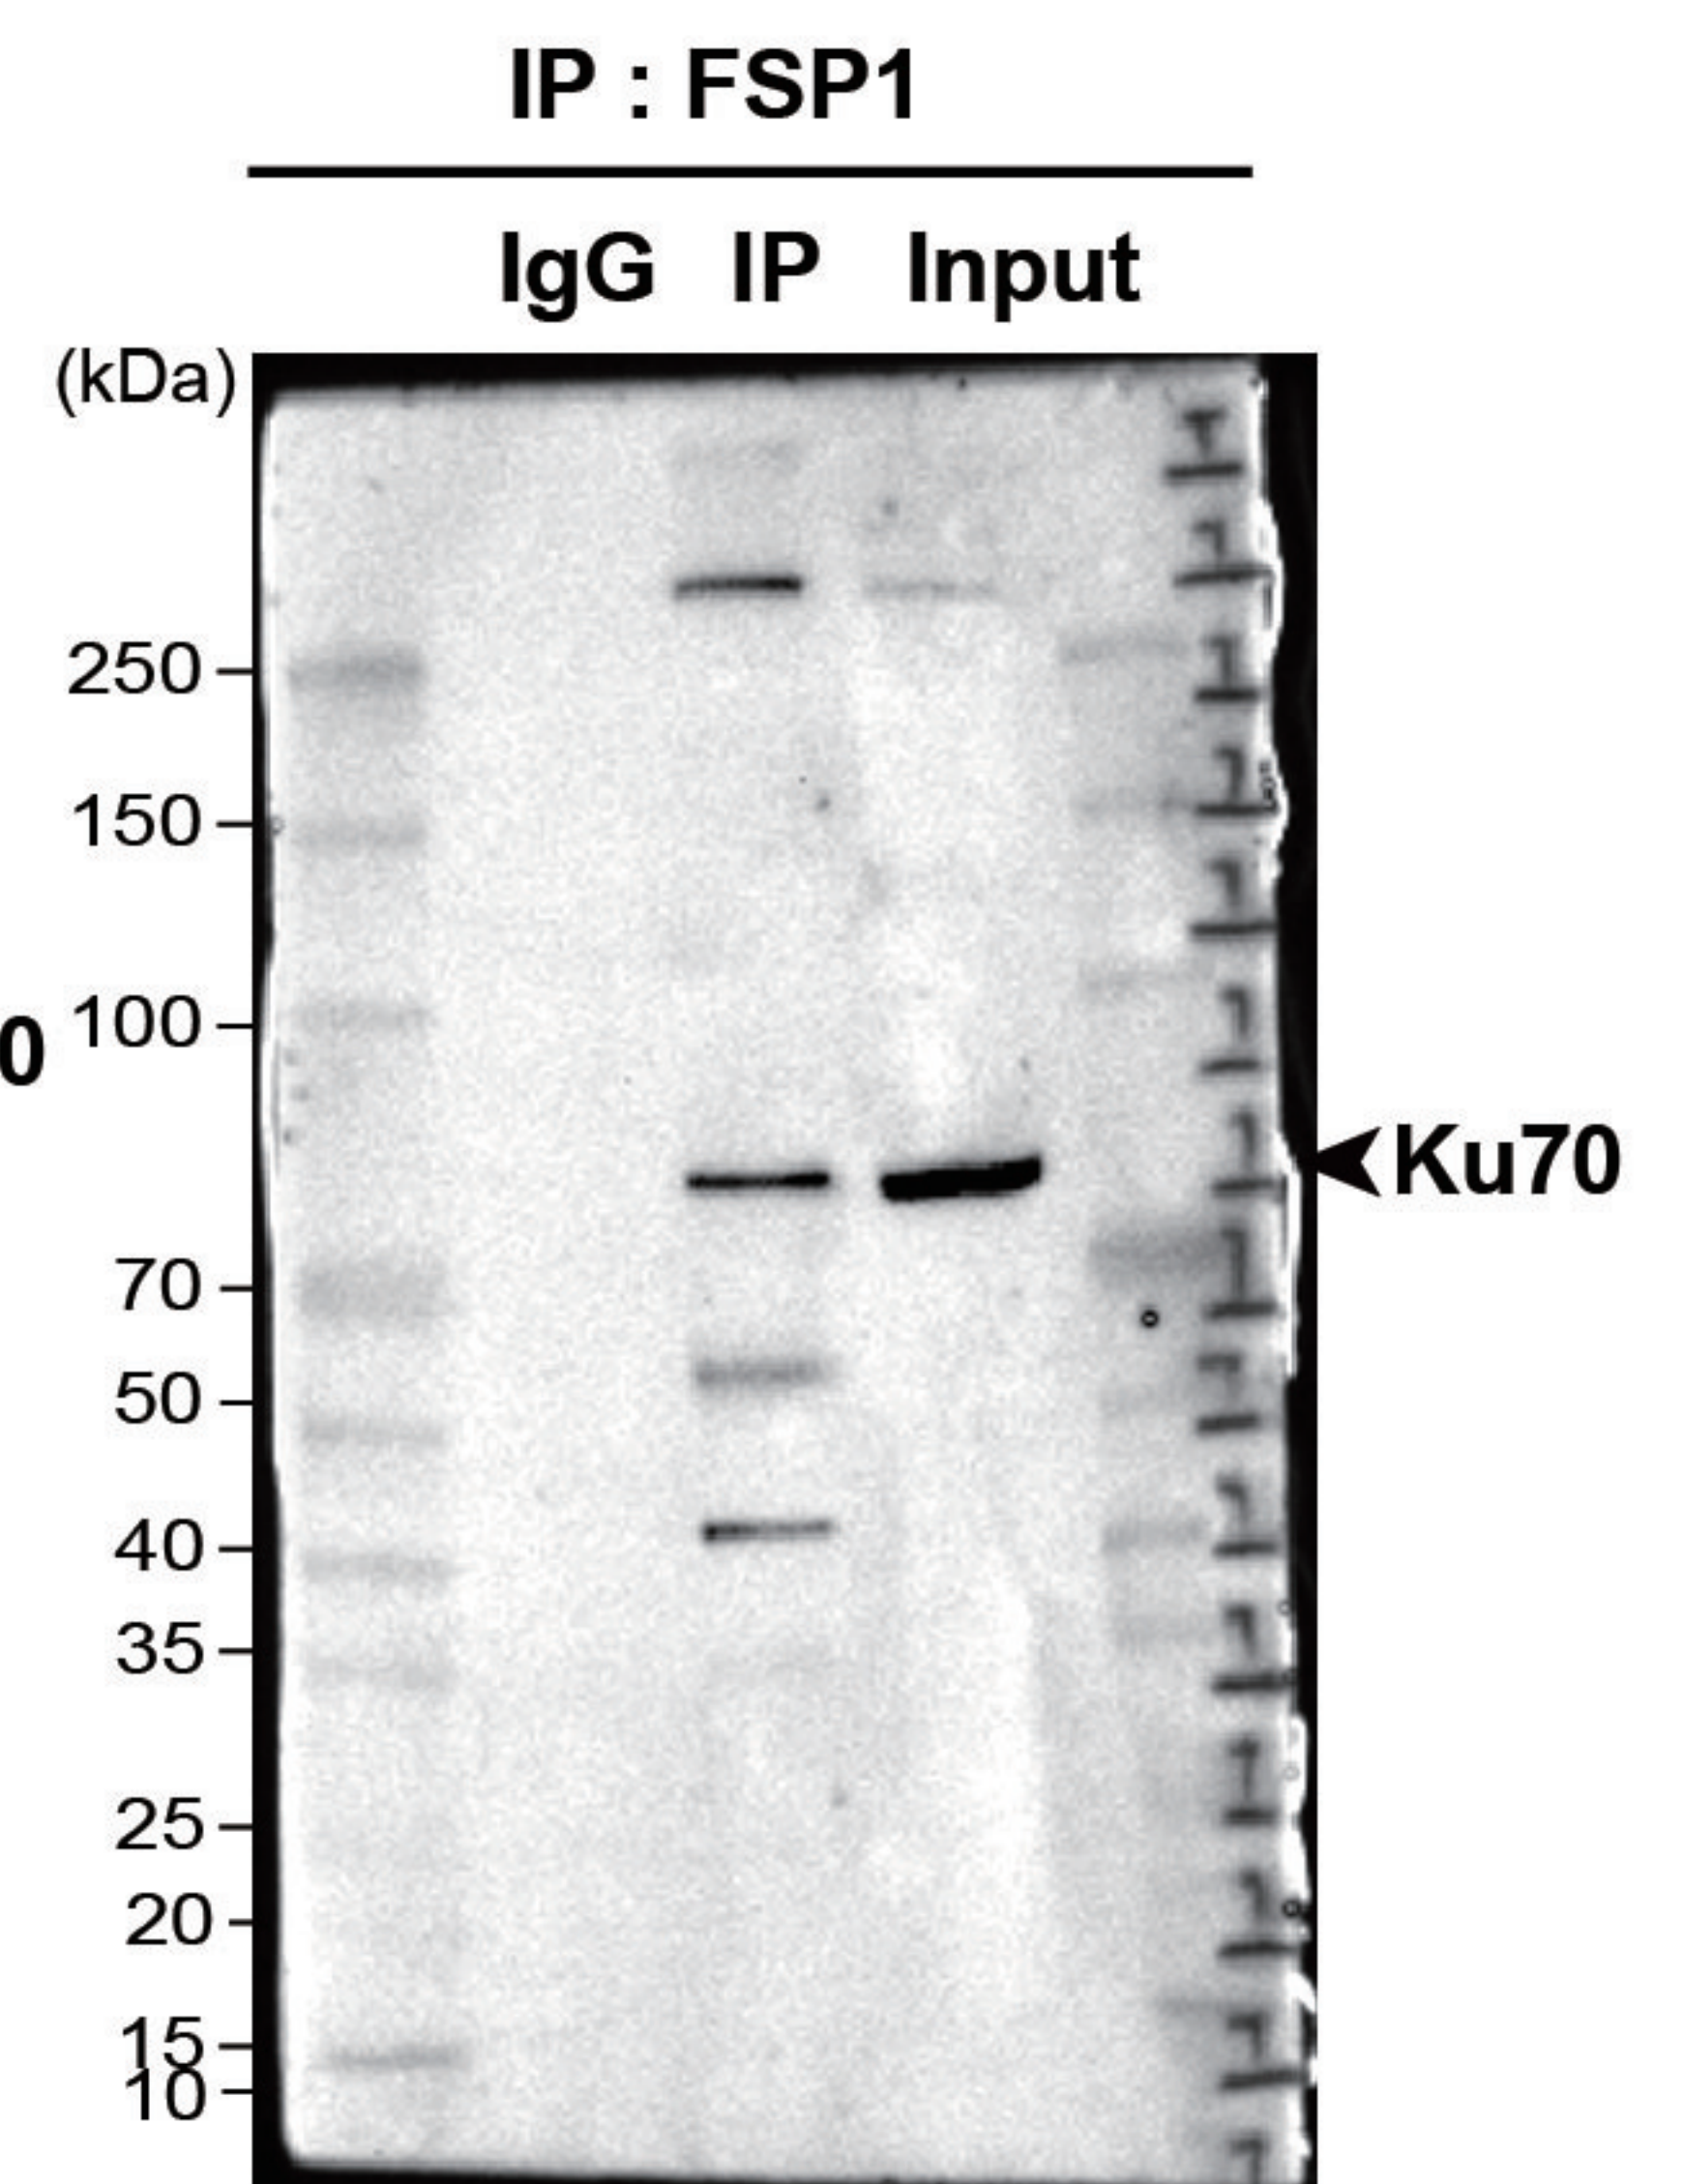**Figure 6A**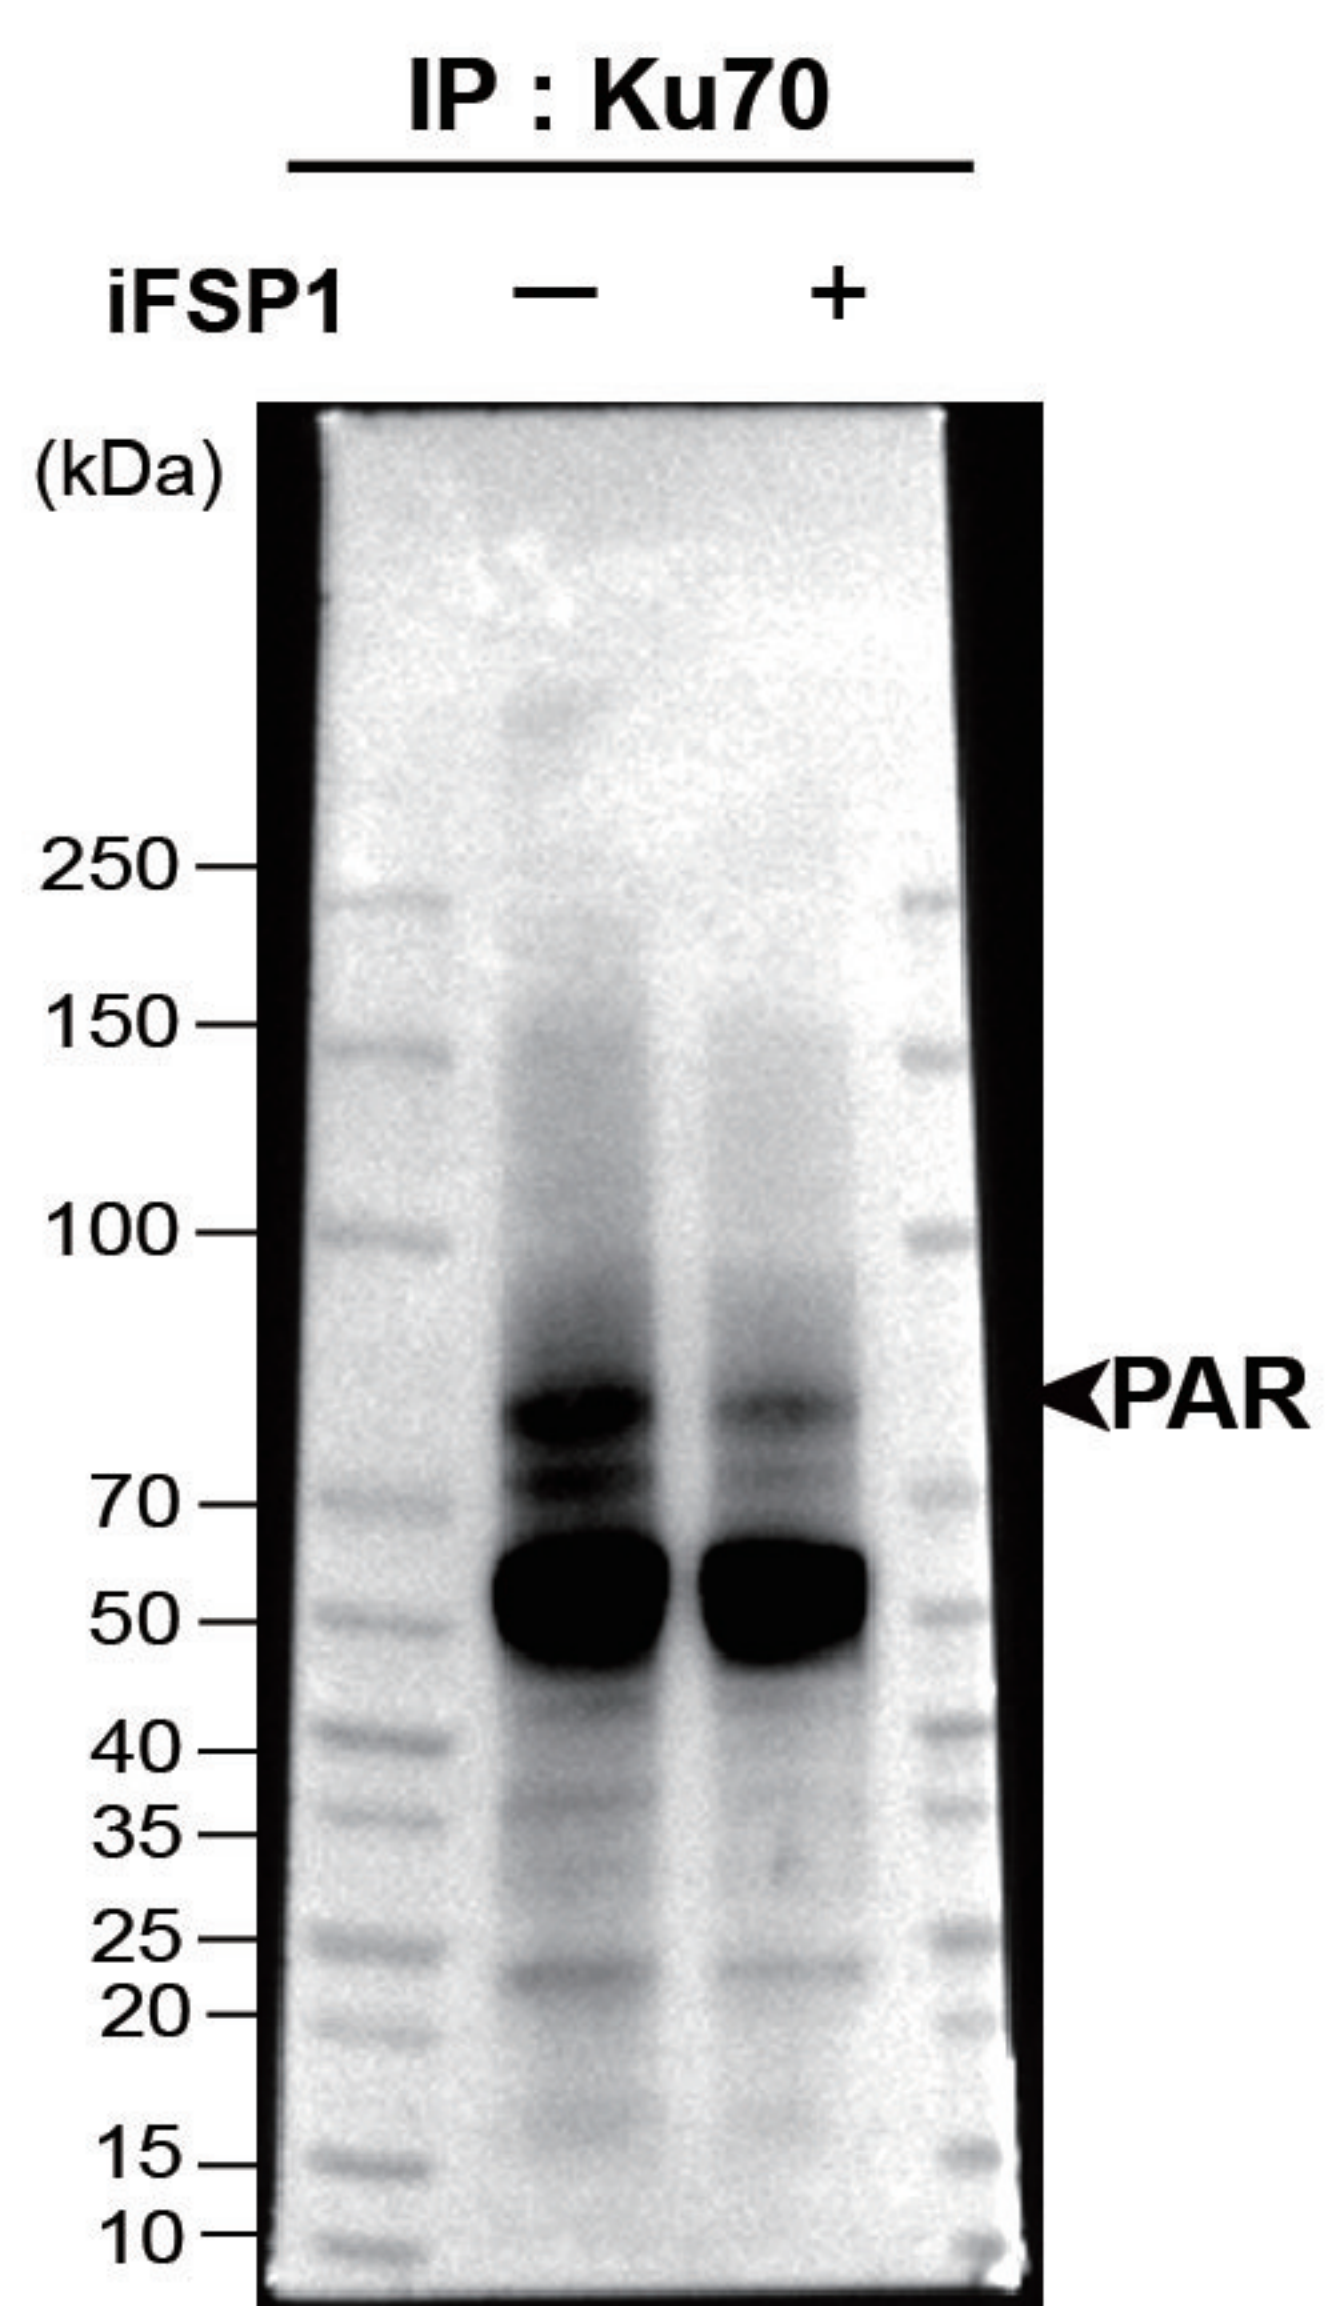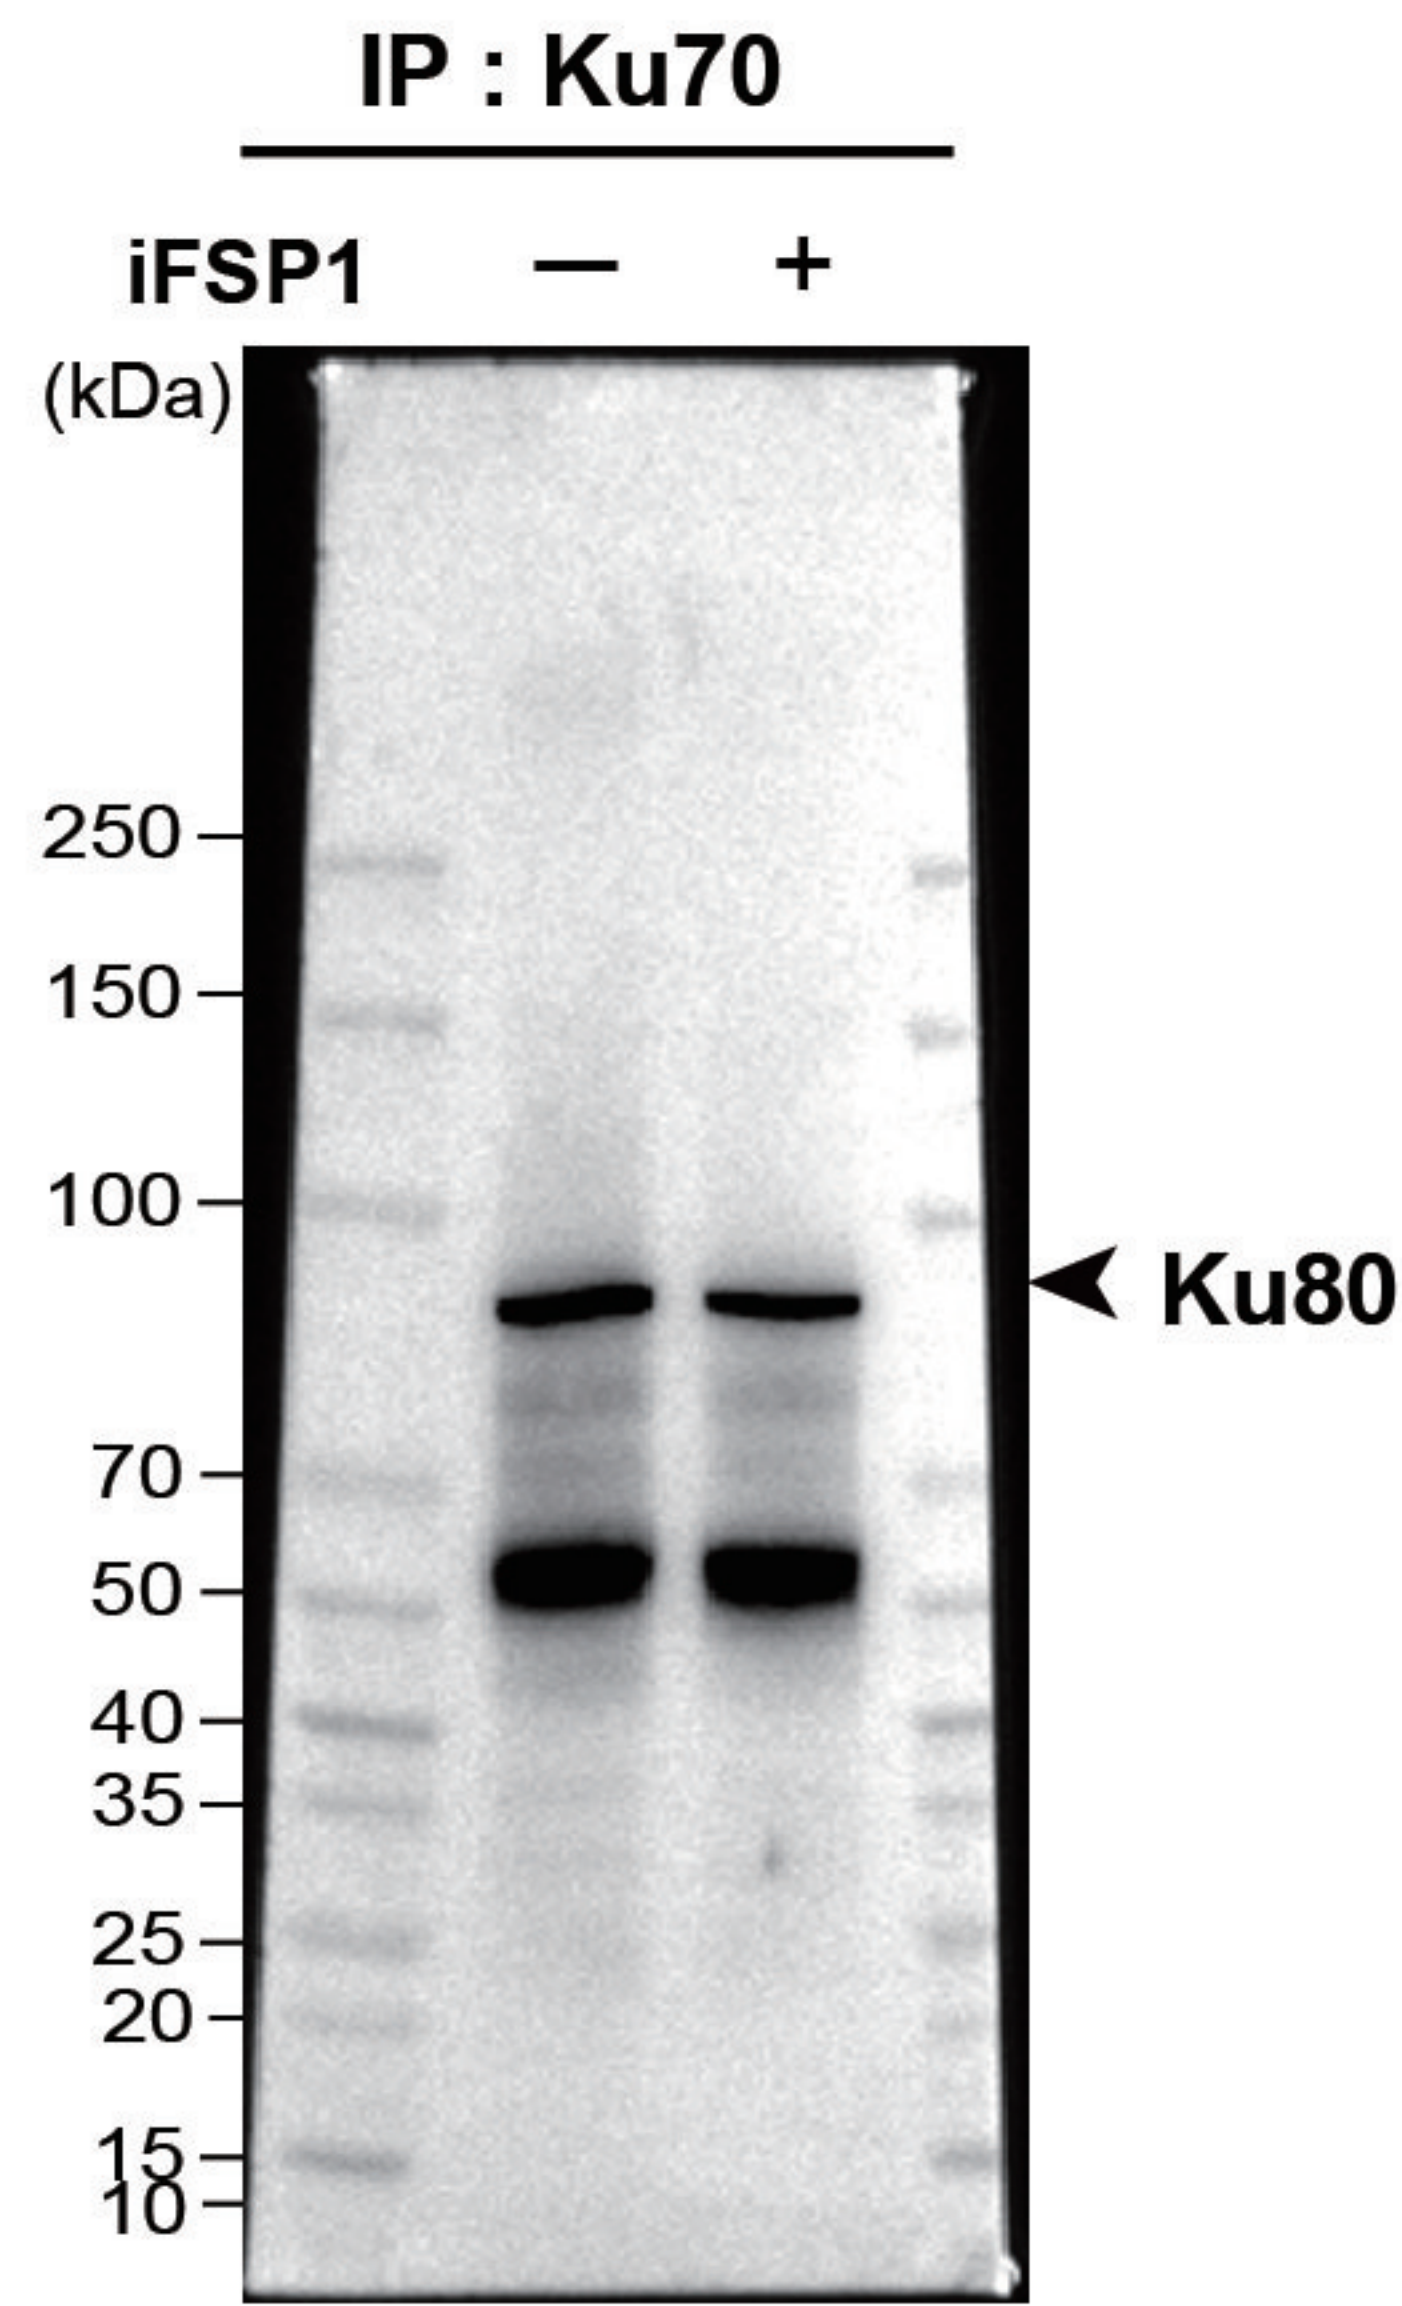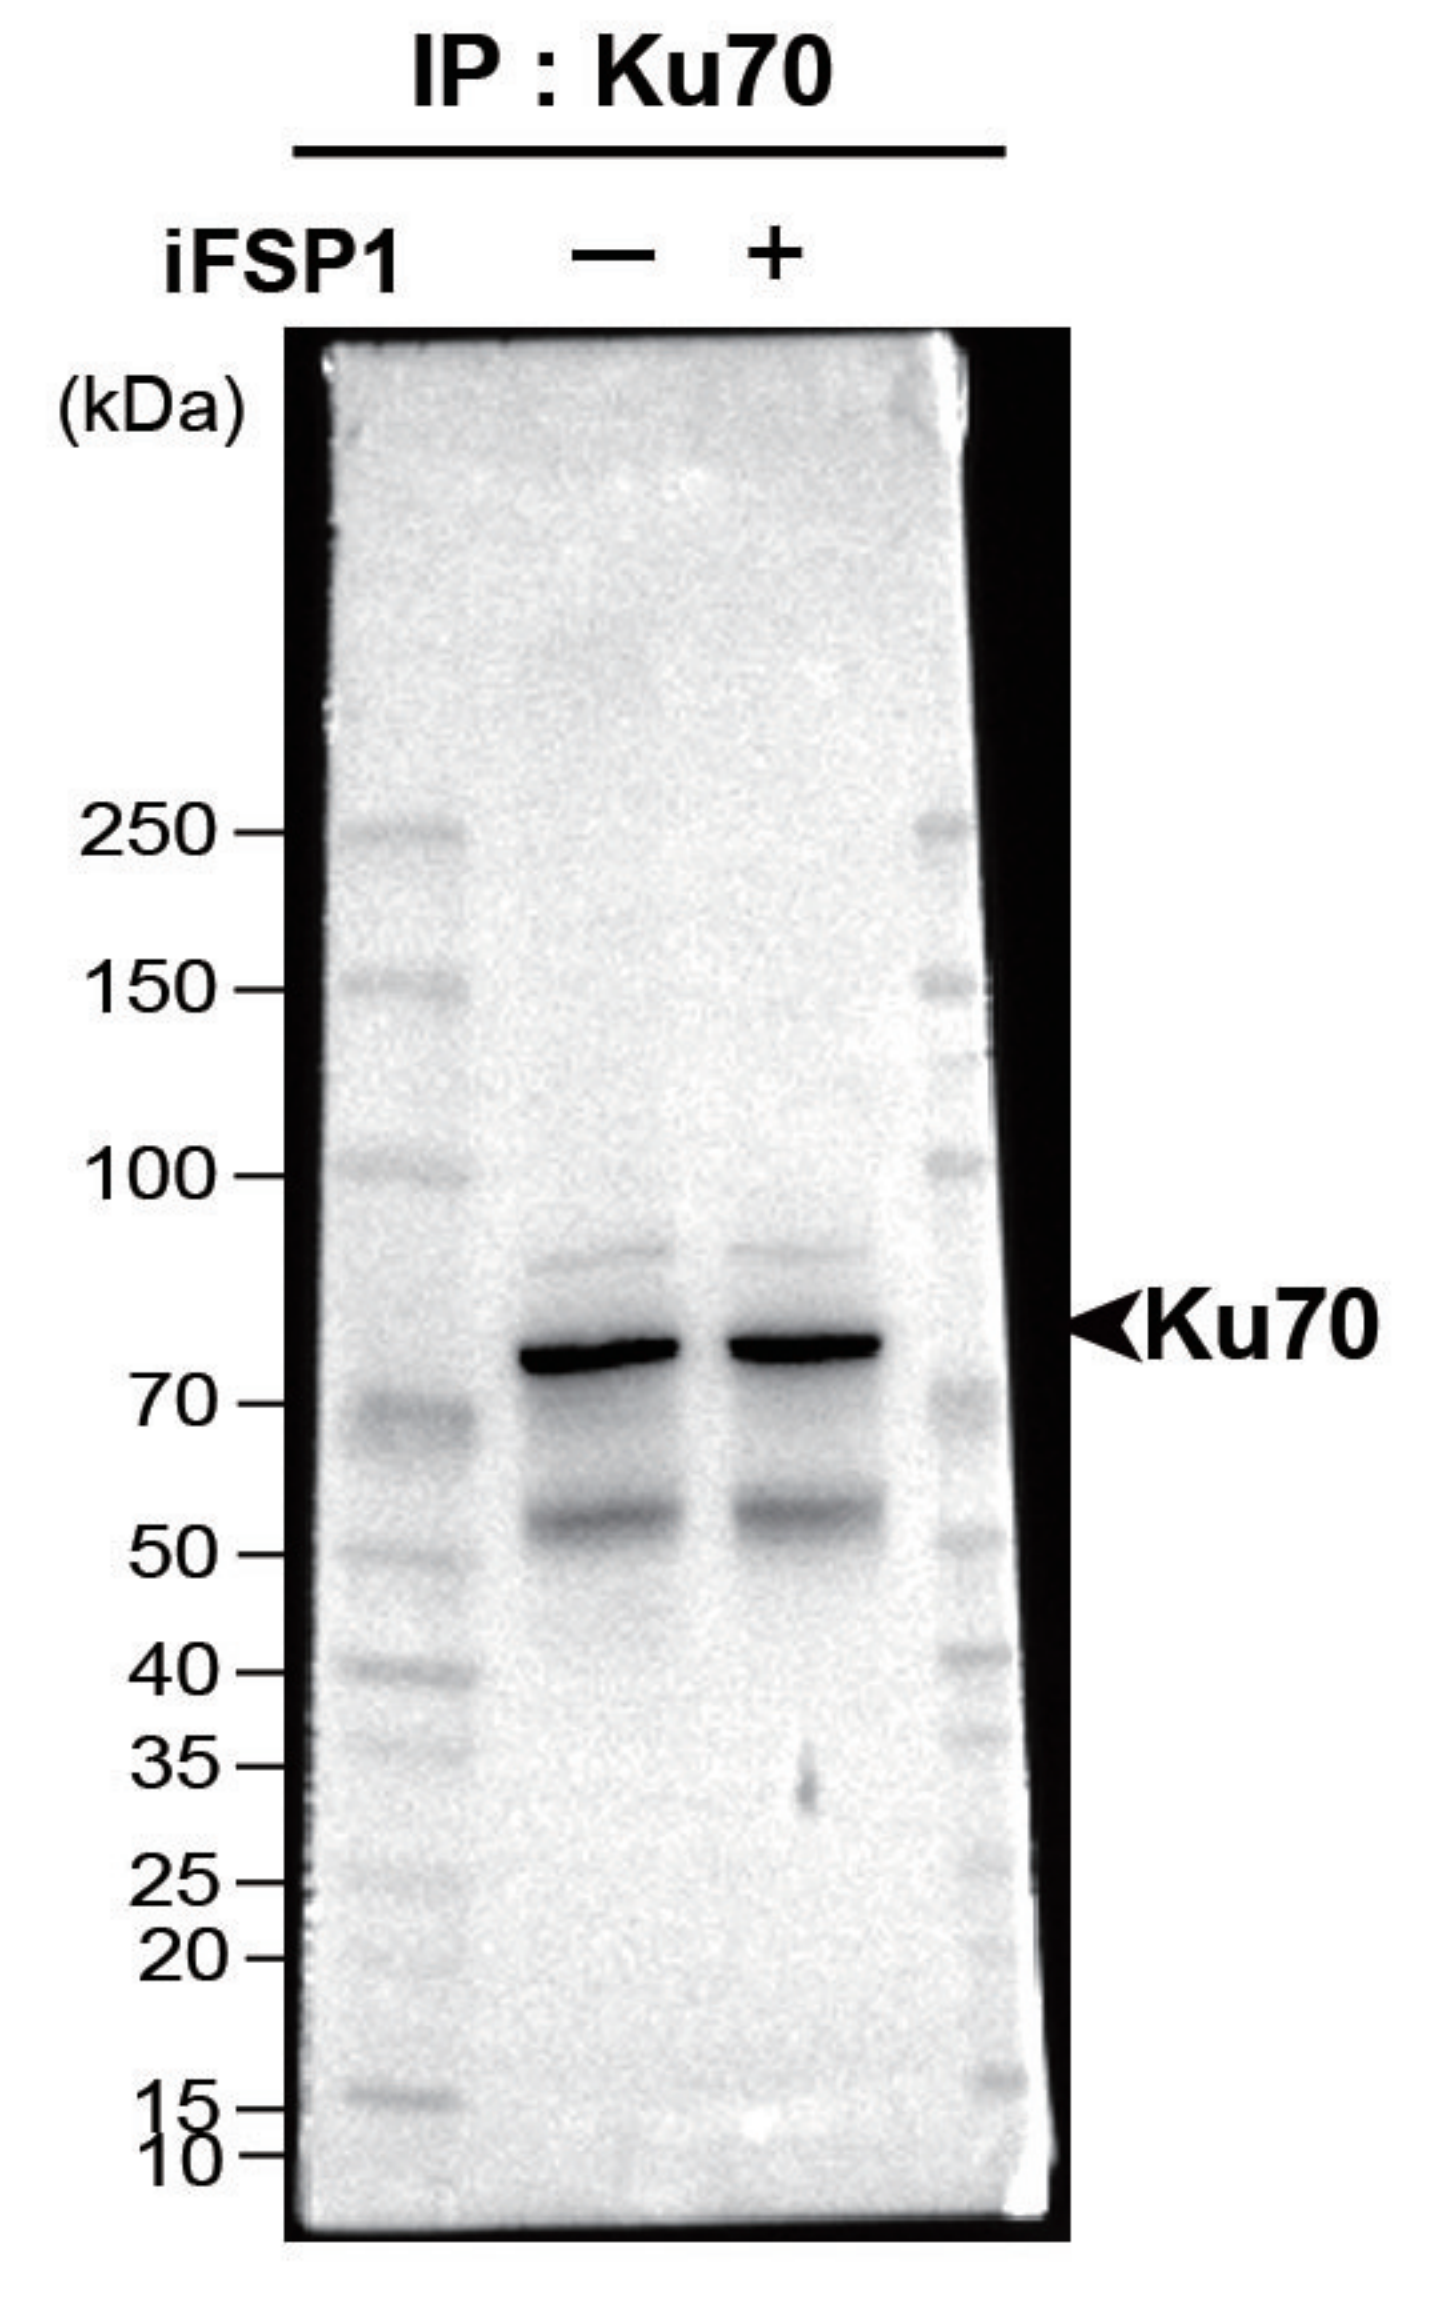

**Figure 6B**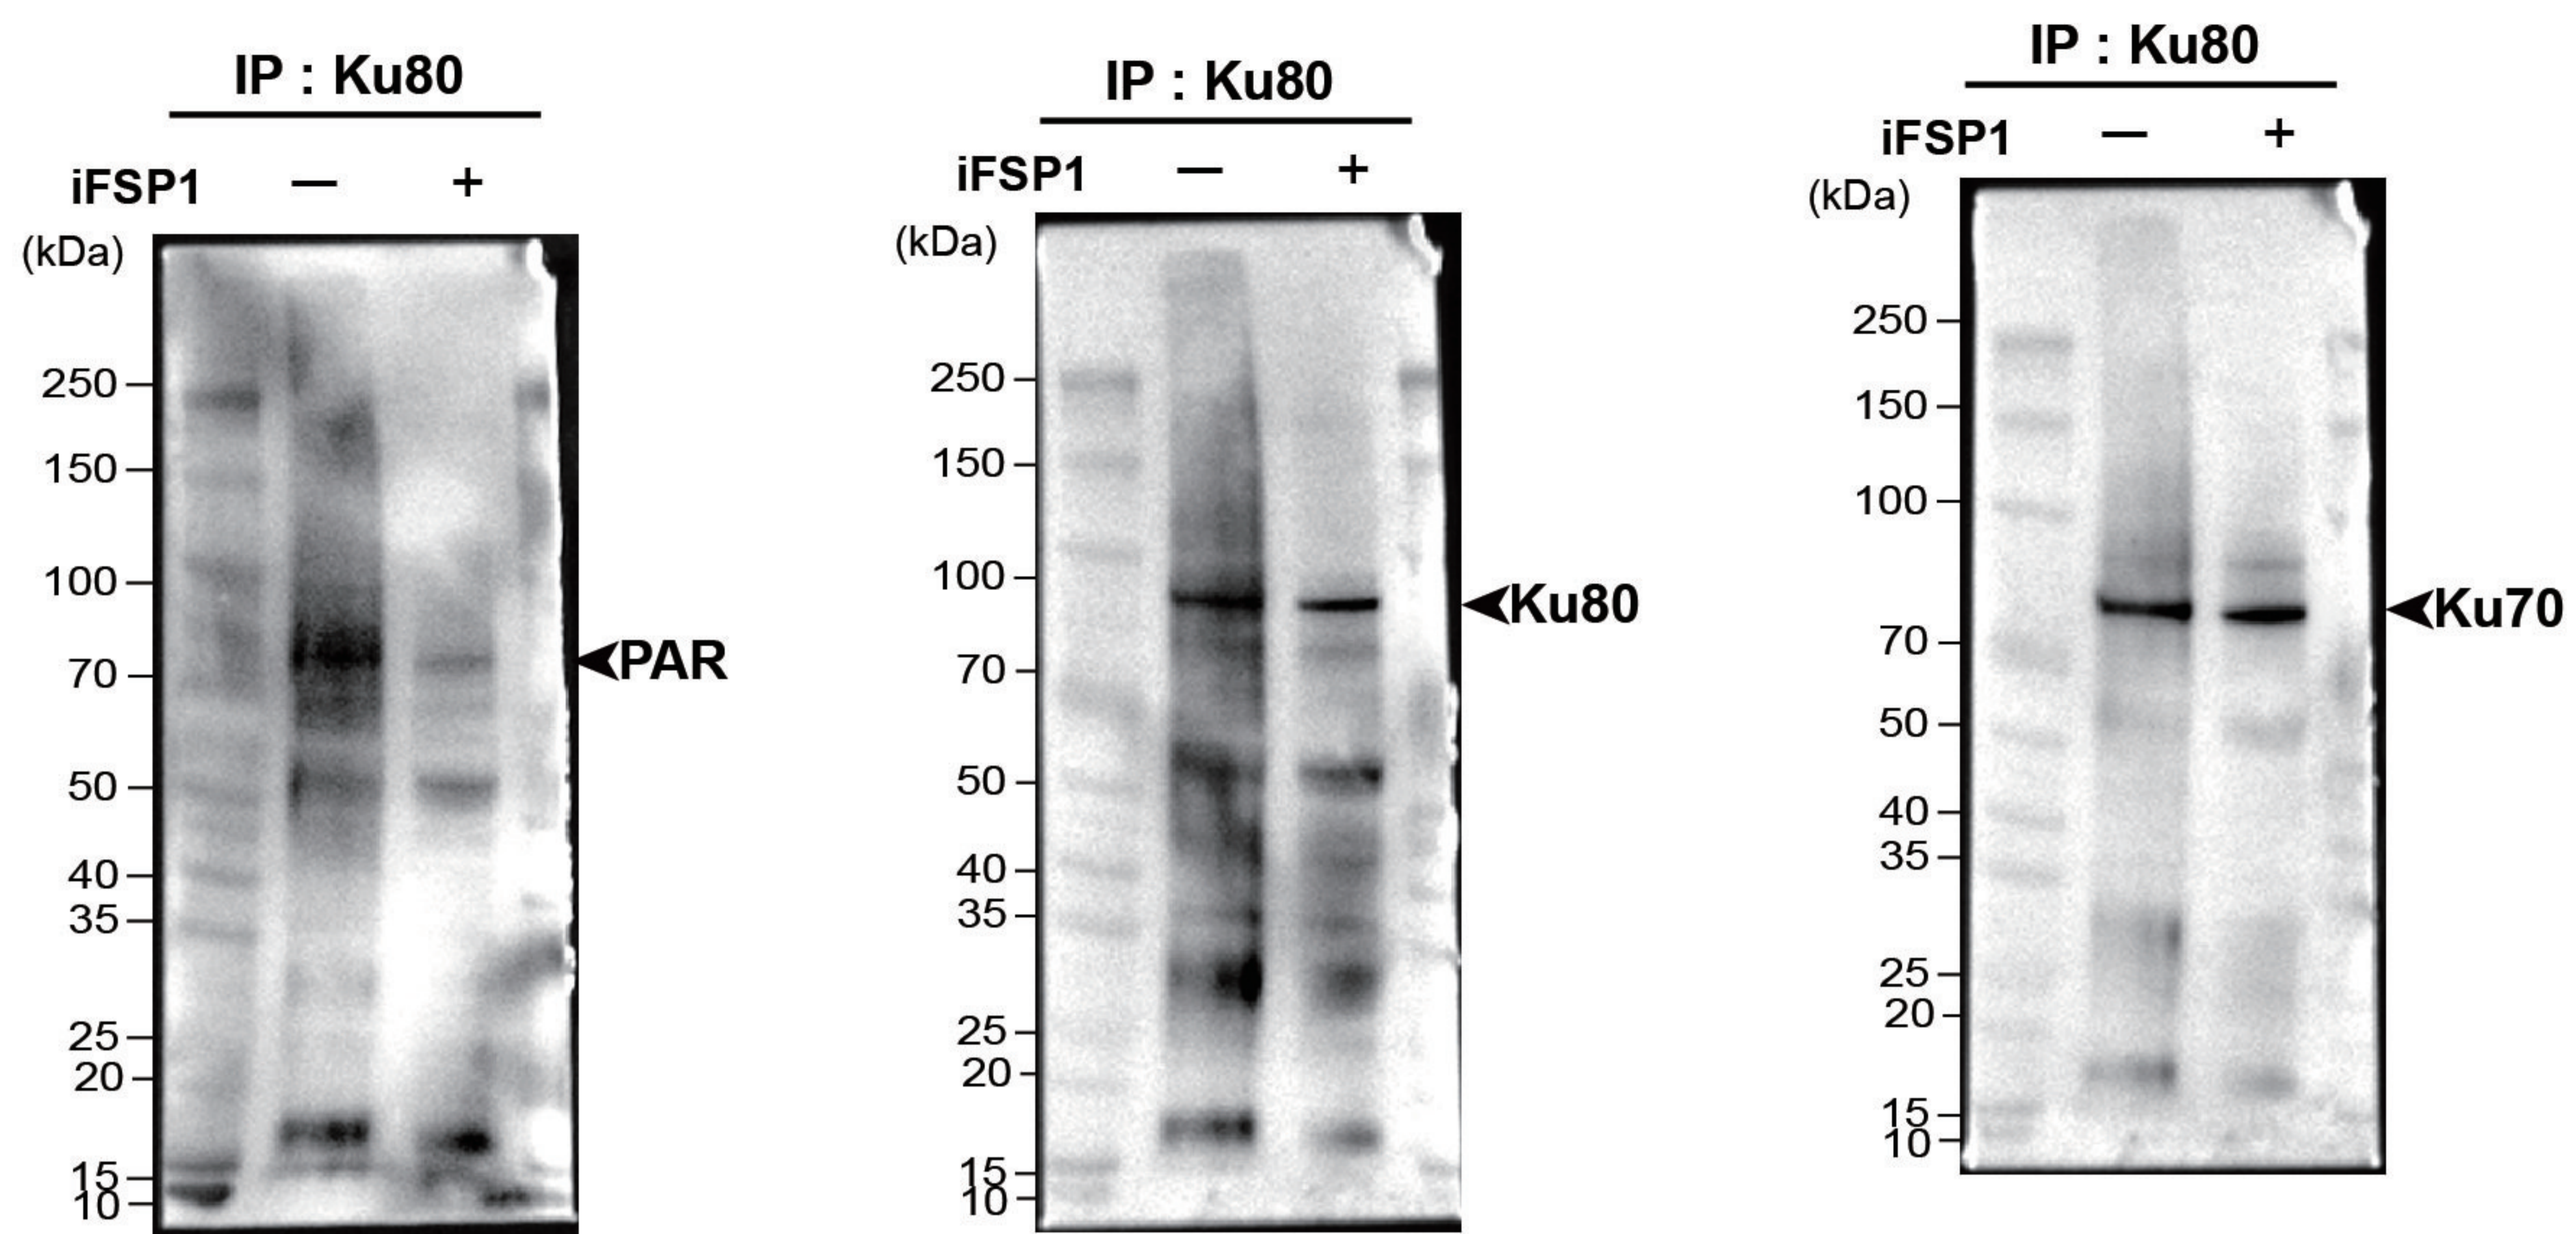**Figure 6E**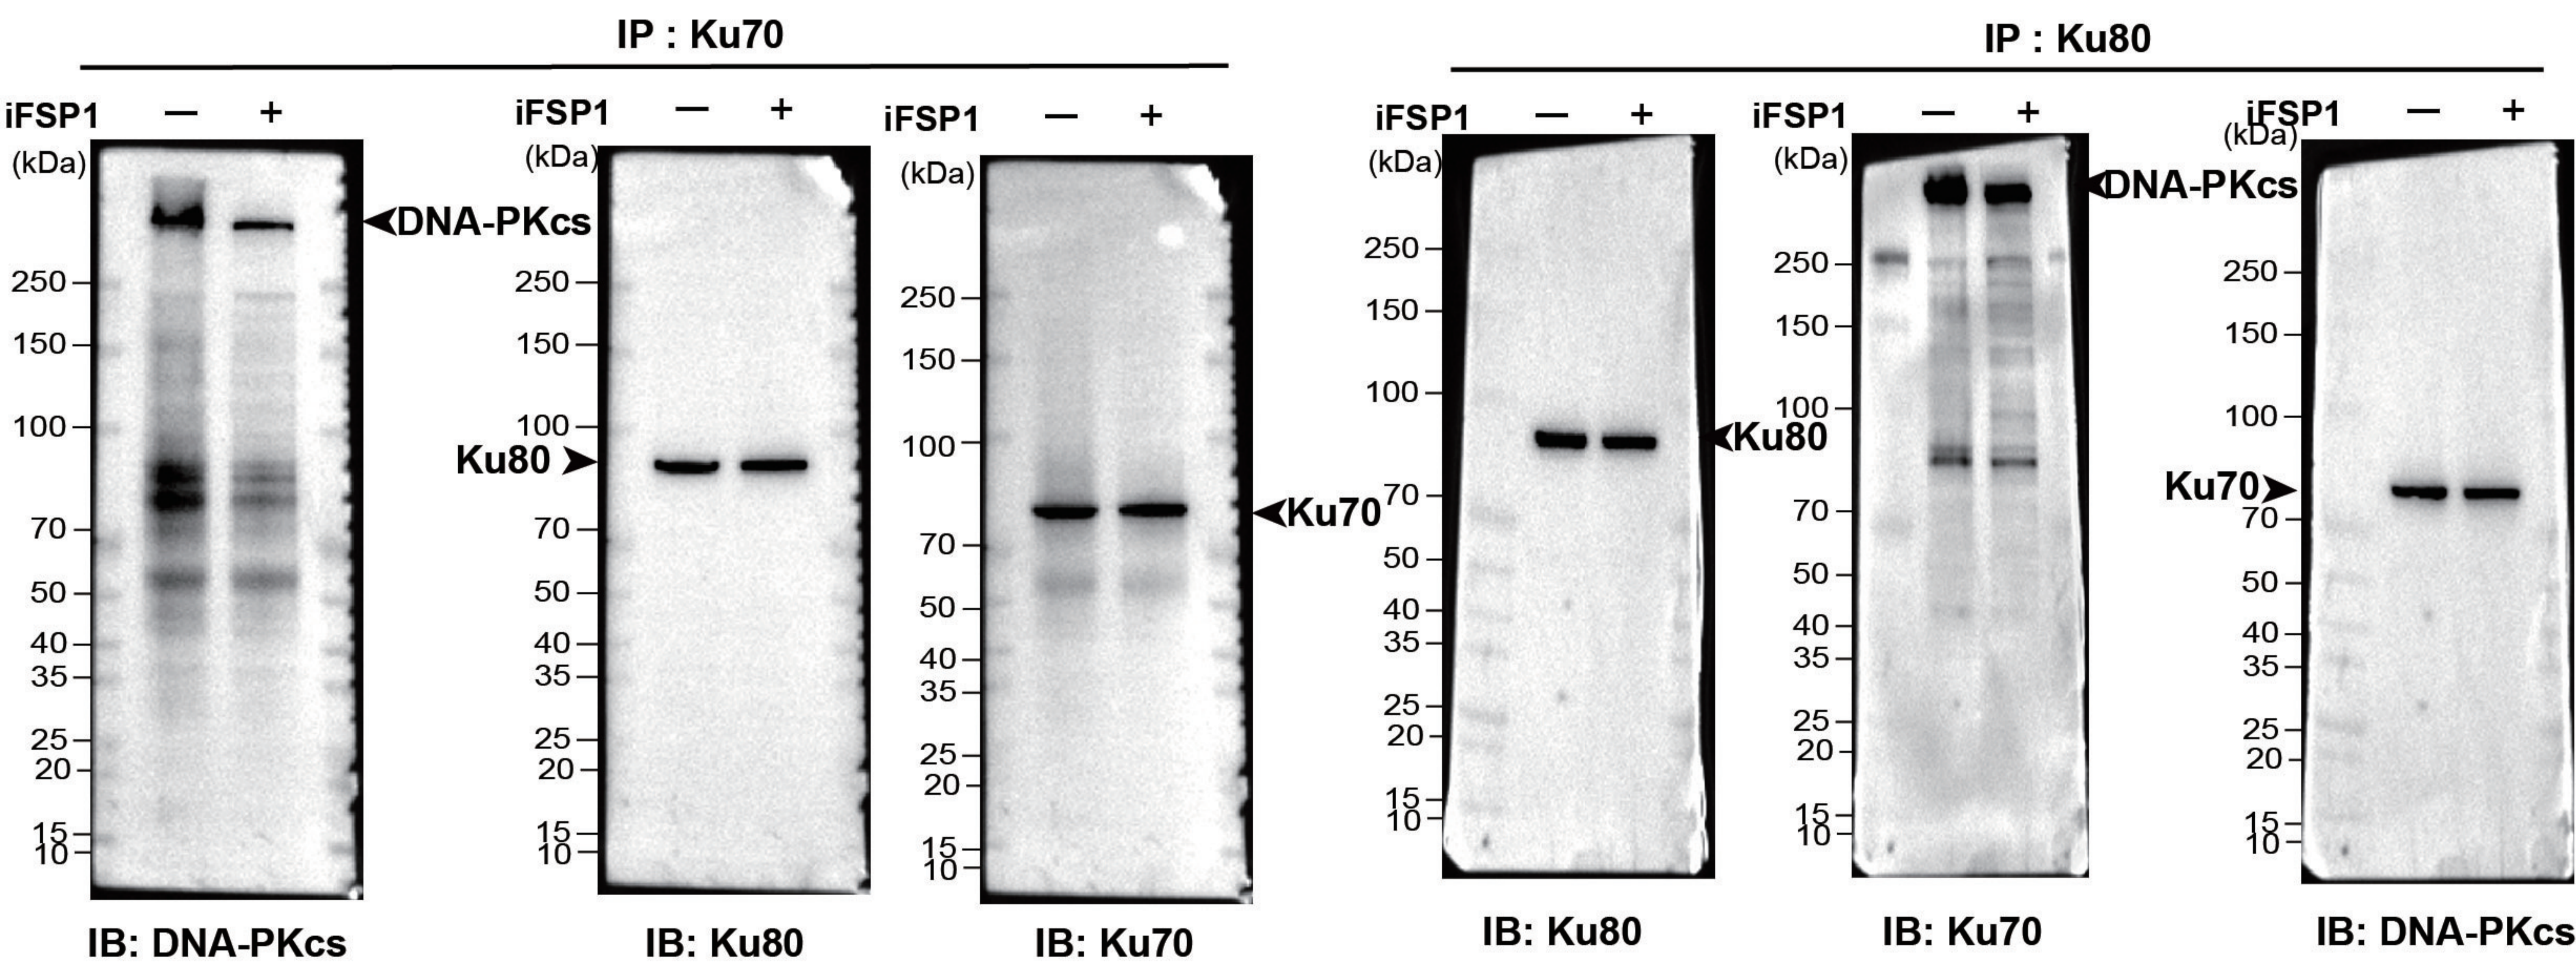**Figure 6F**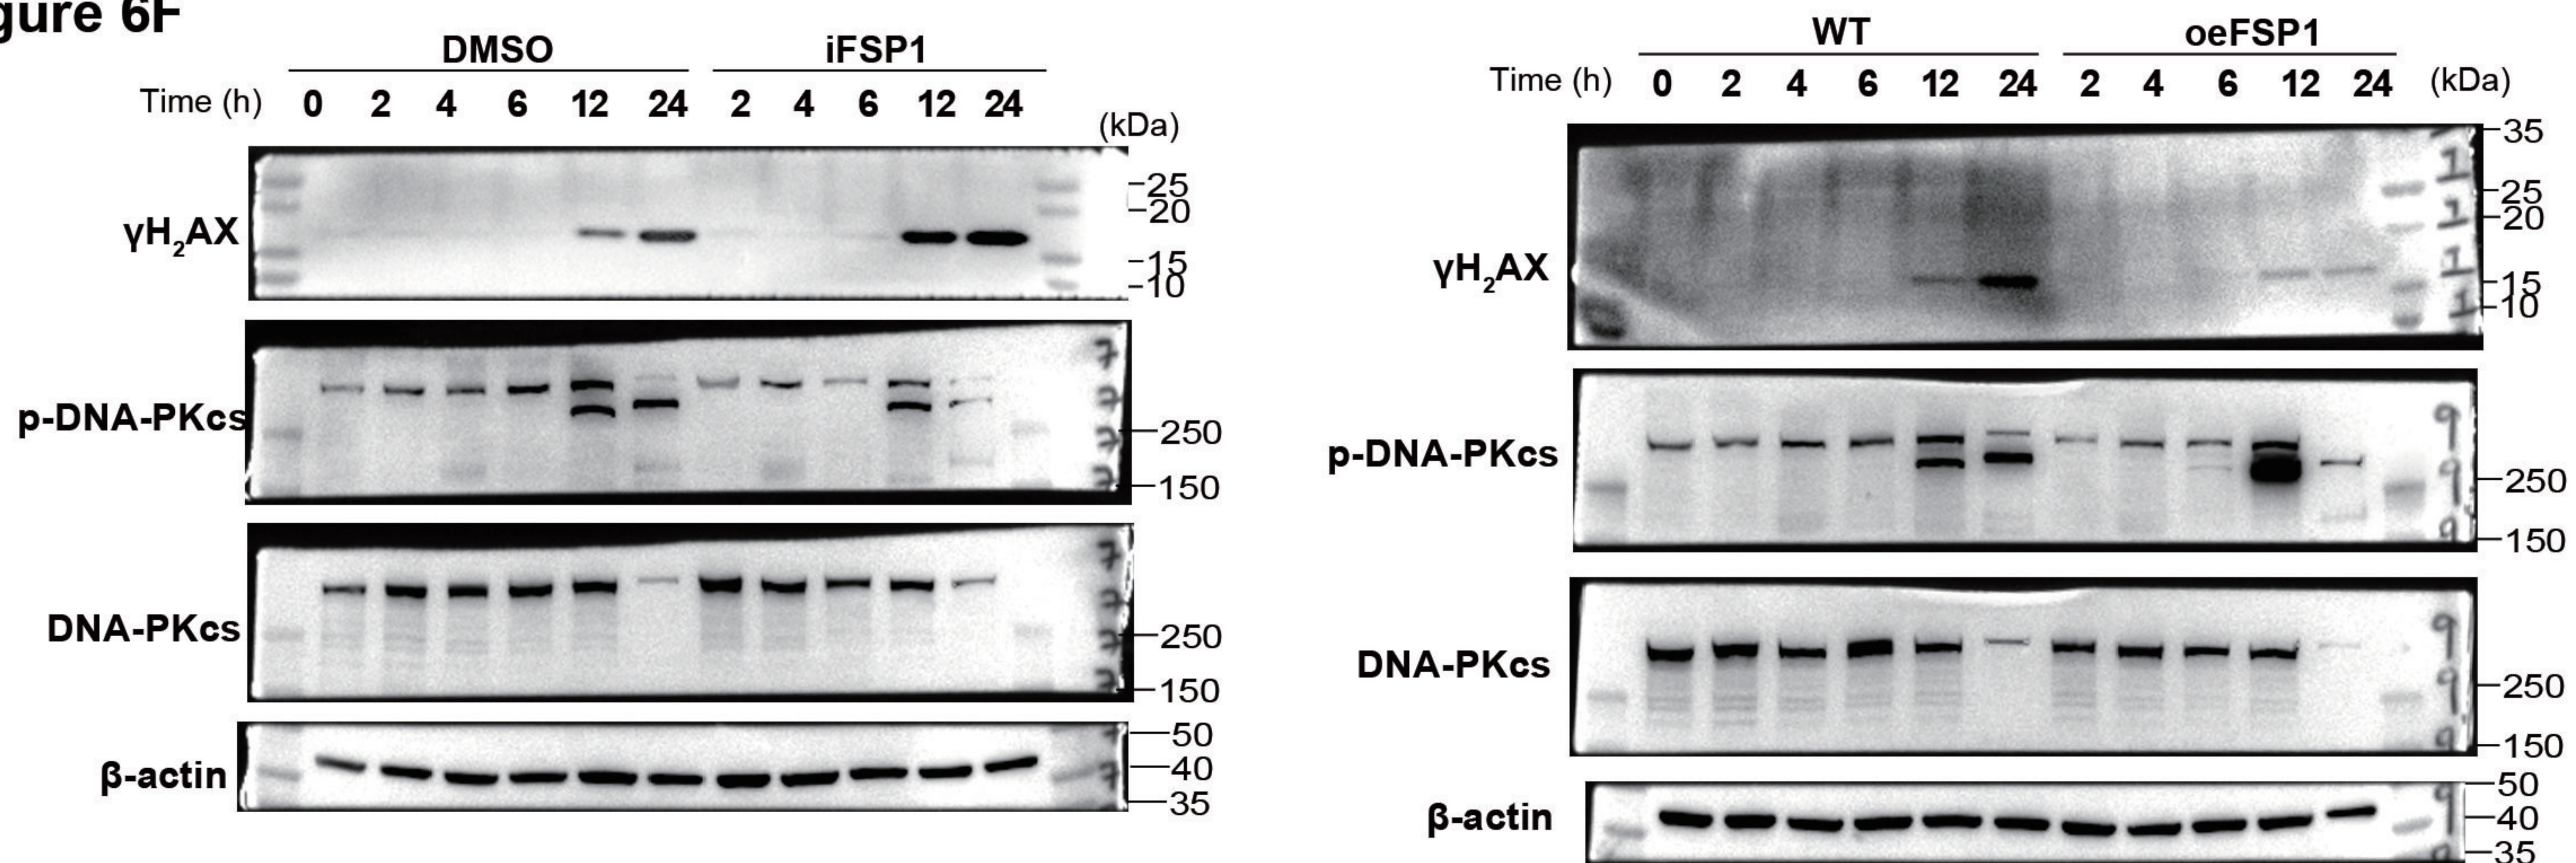

**Figure S1E**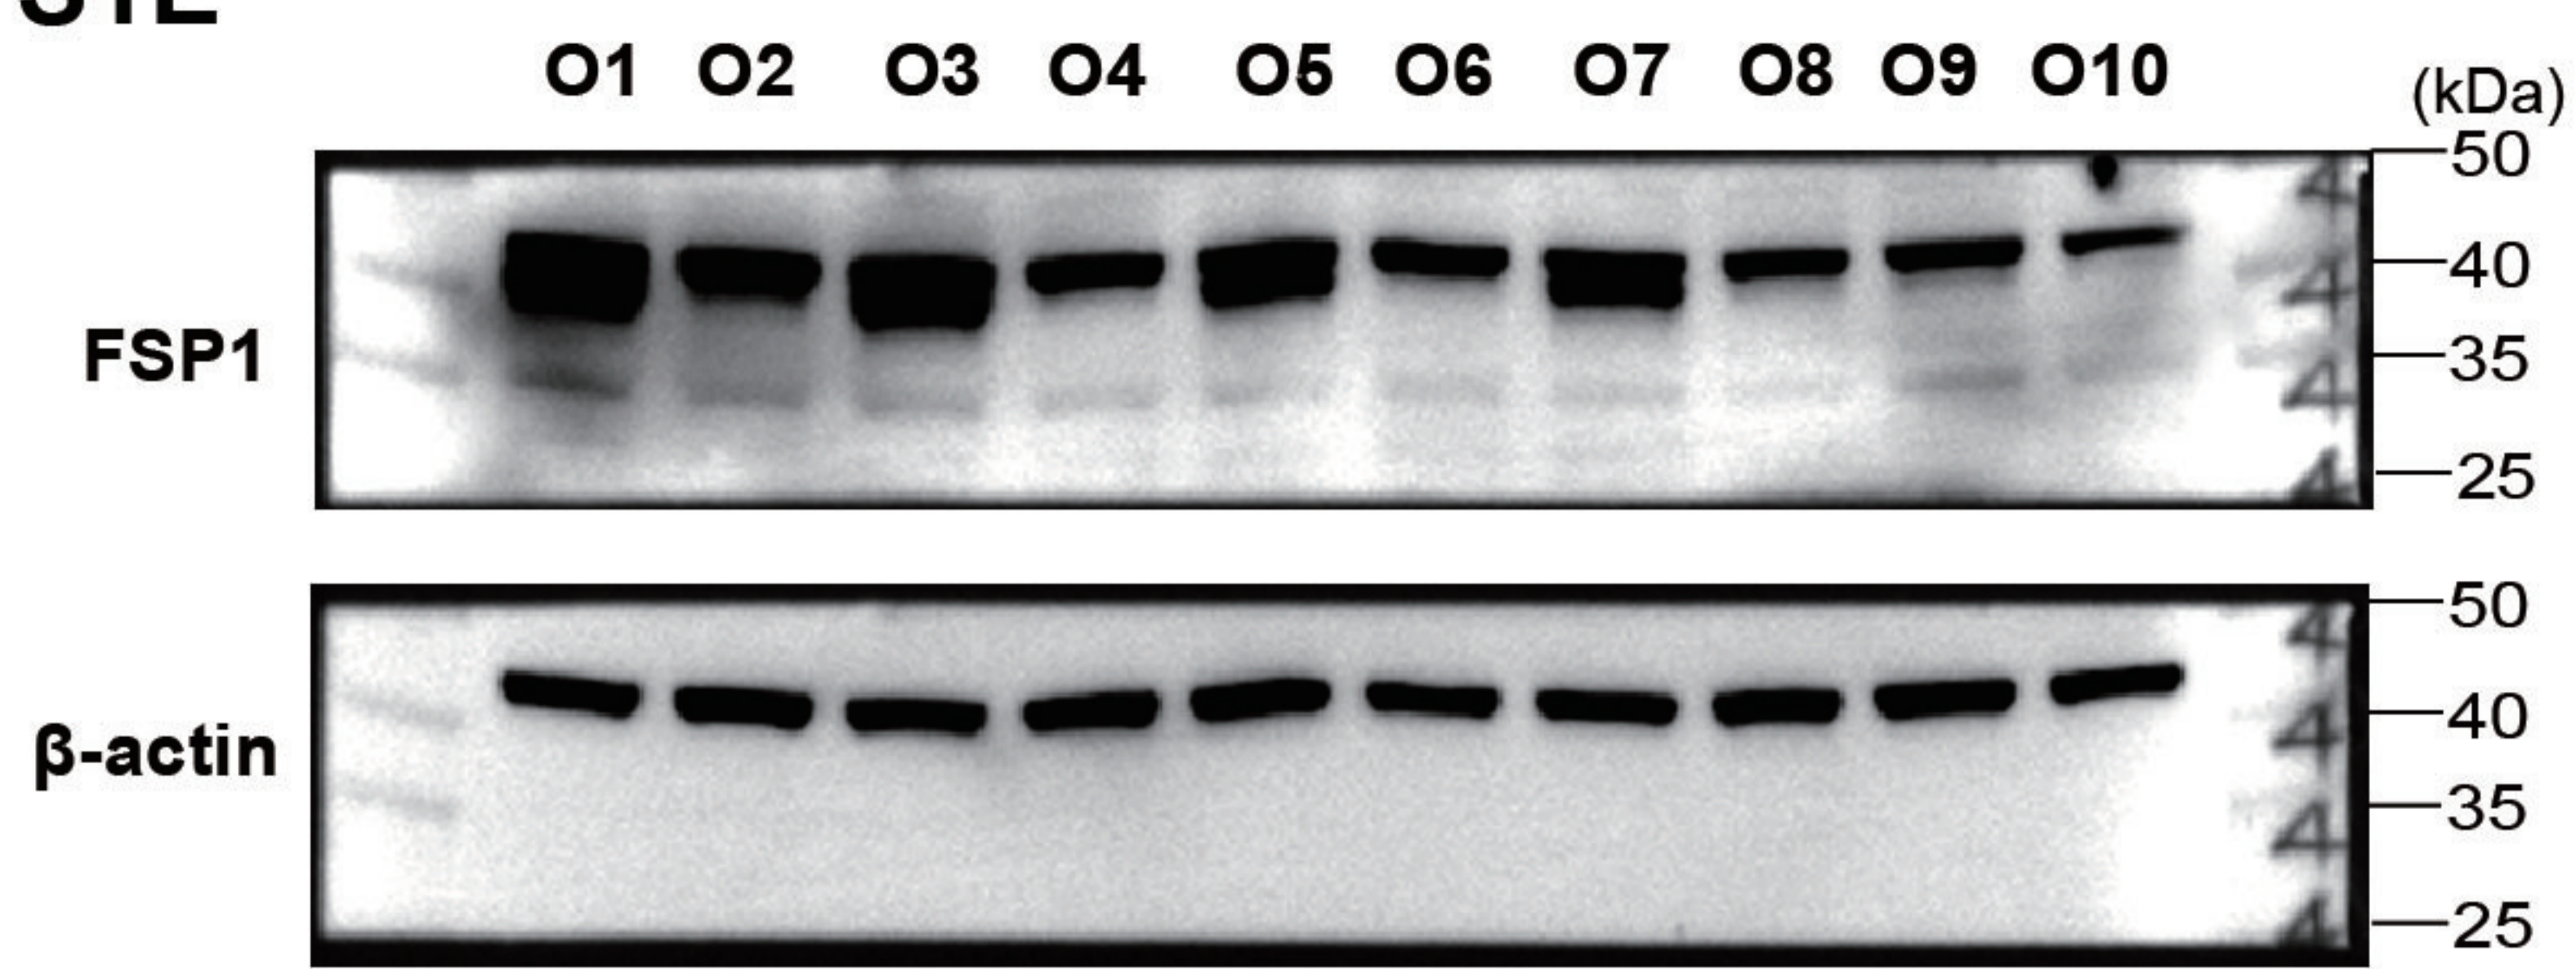**Figure S2B**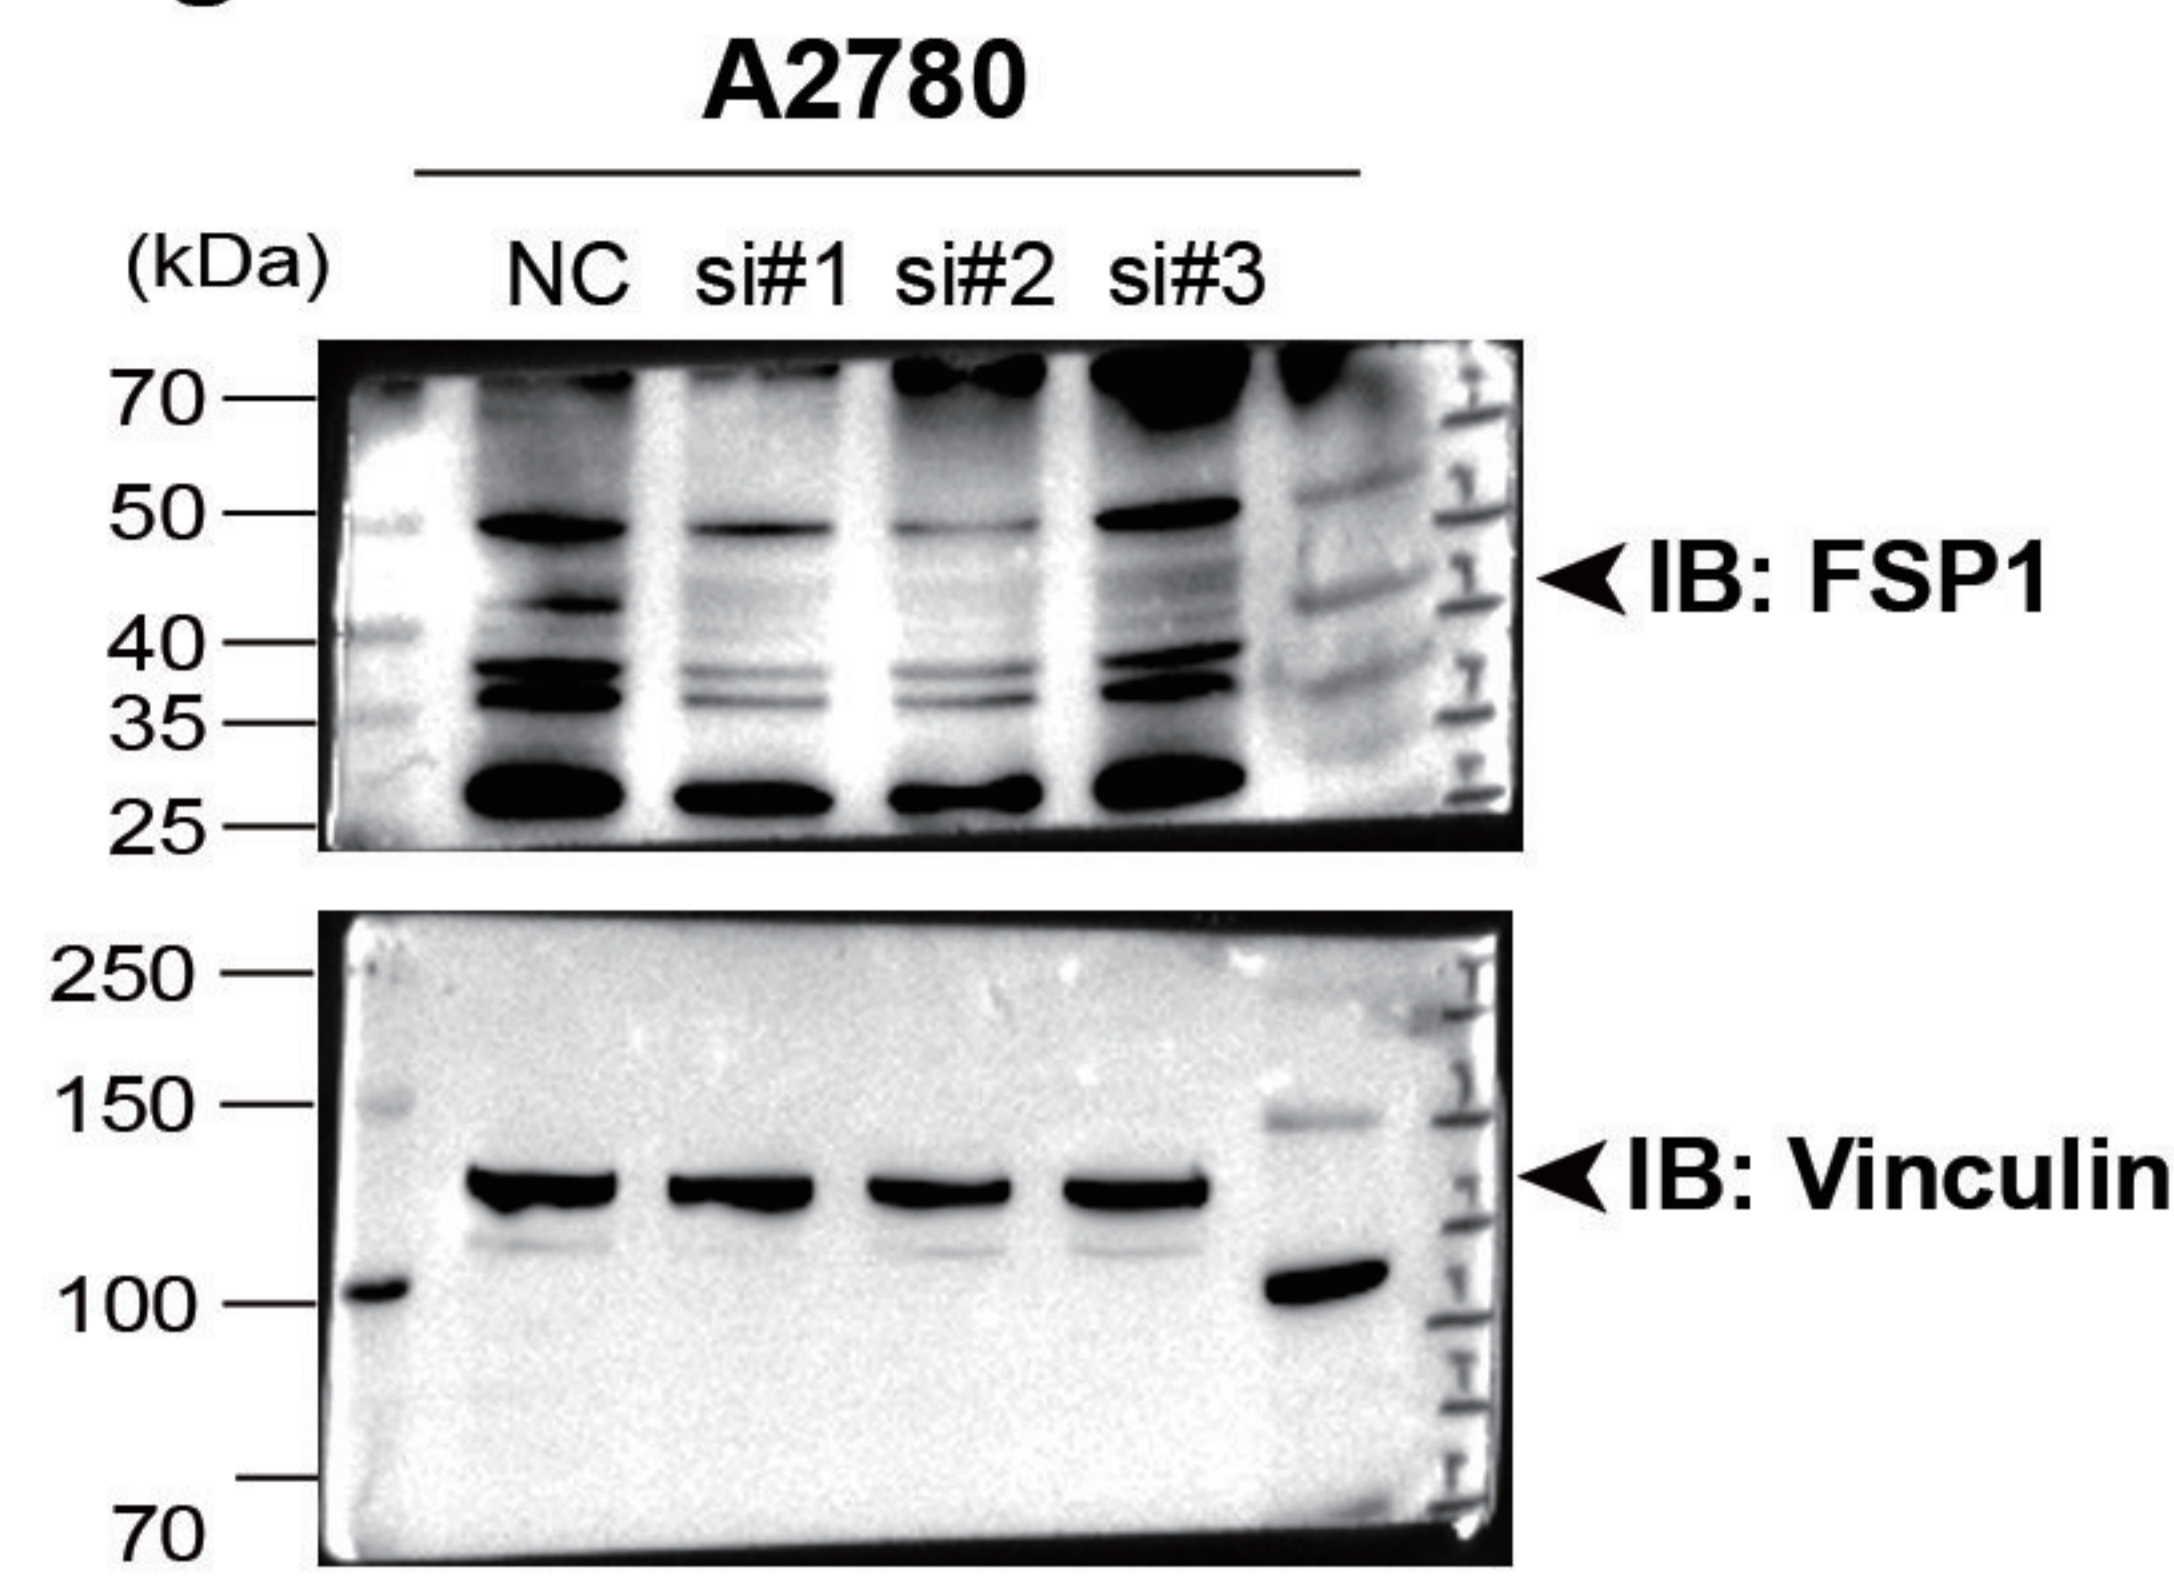**Figure S3A**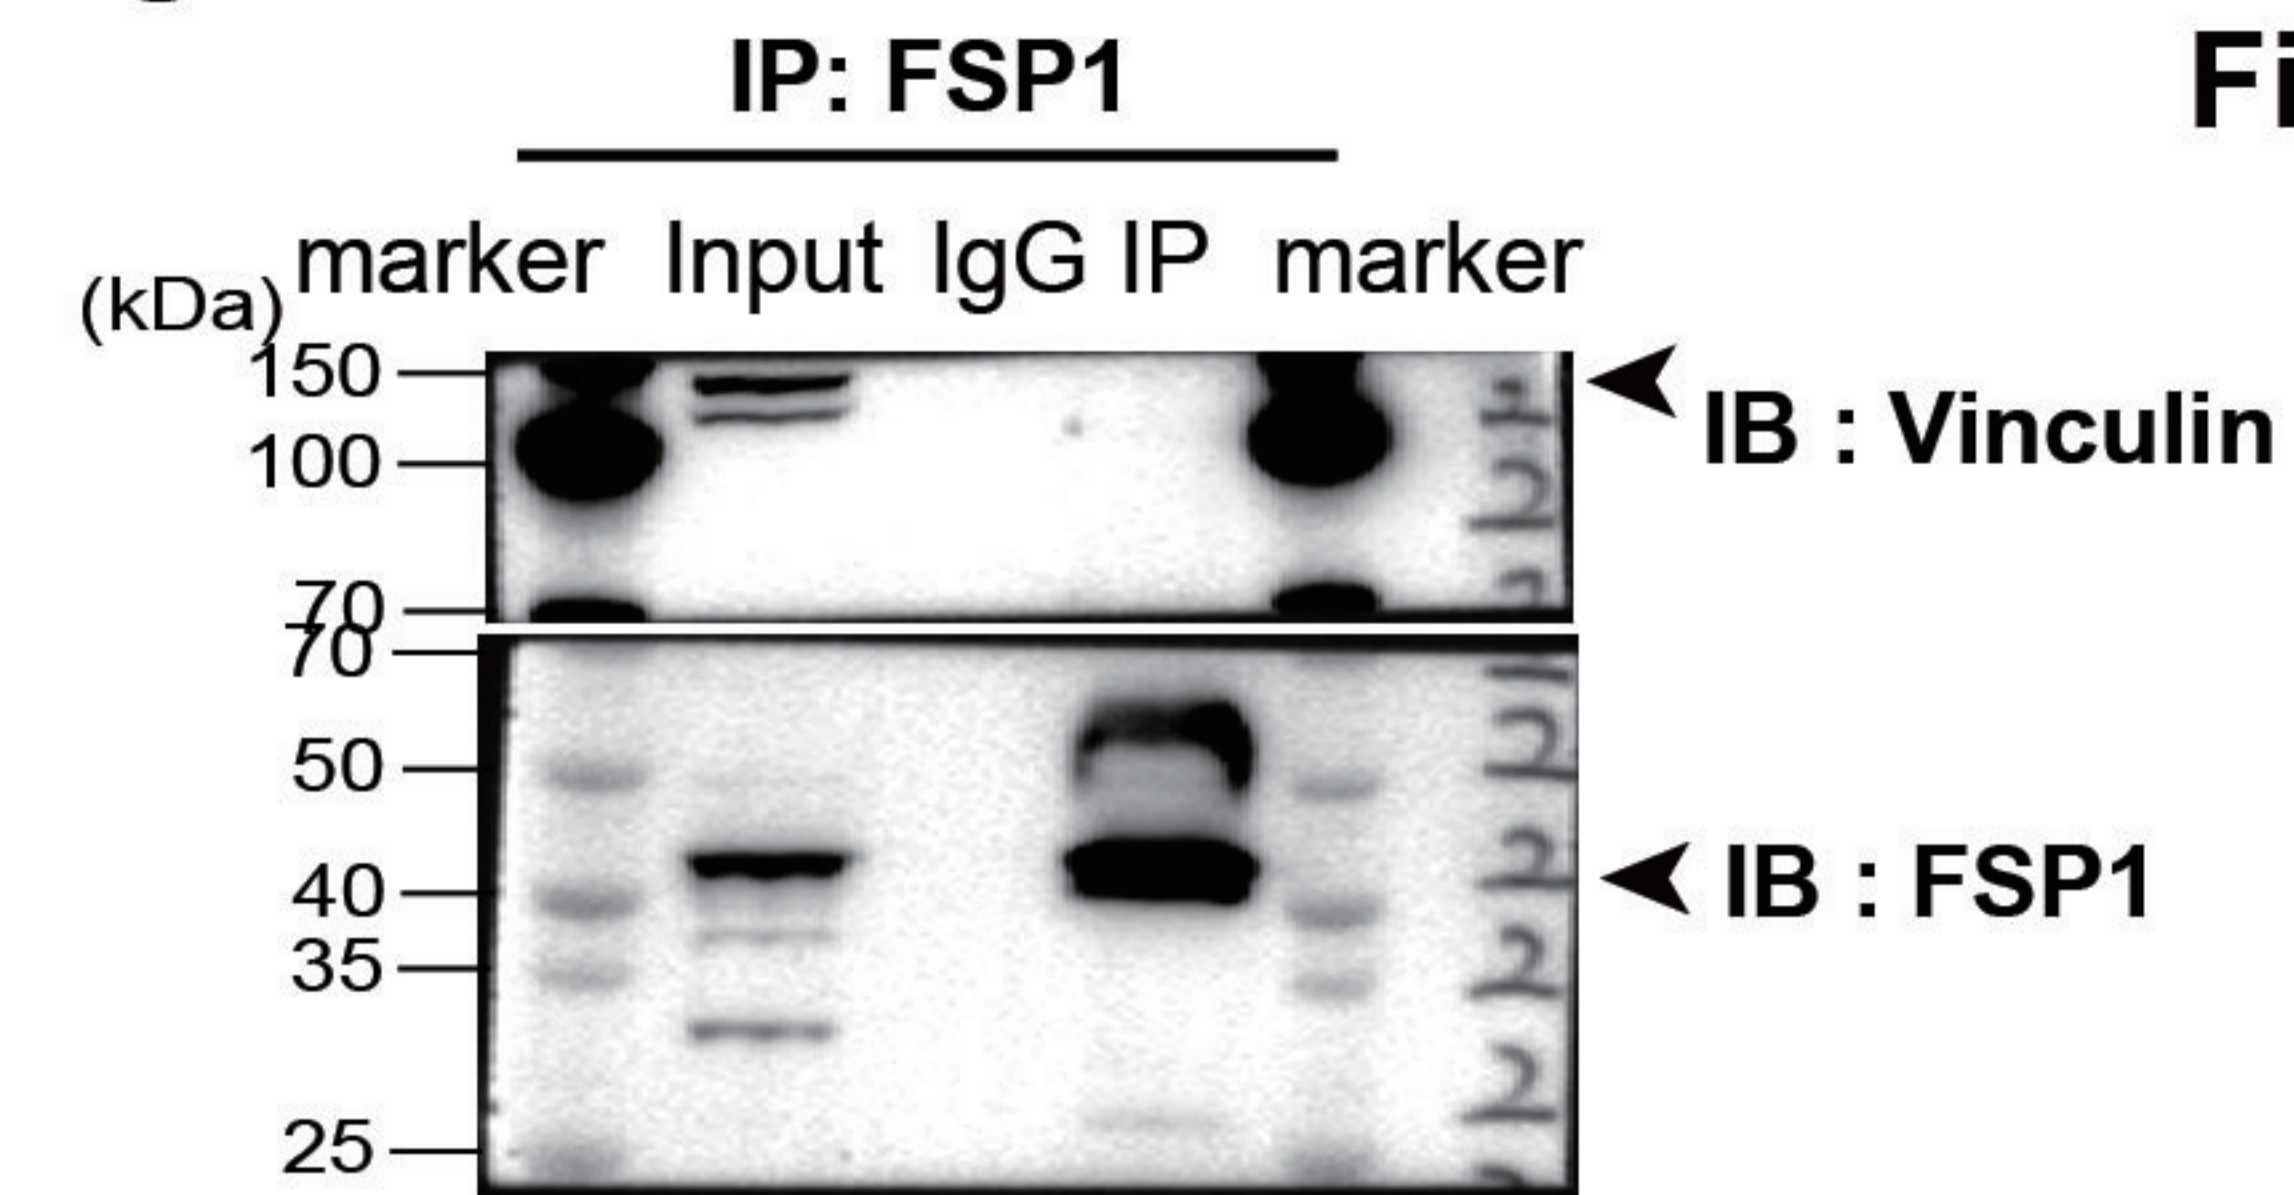**Figure S4B**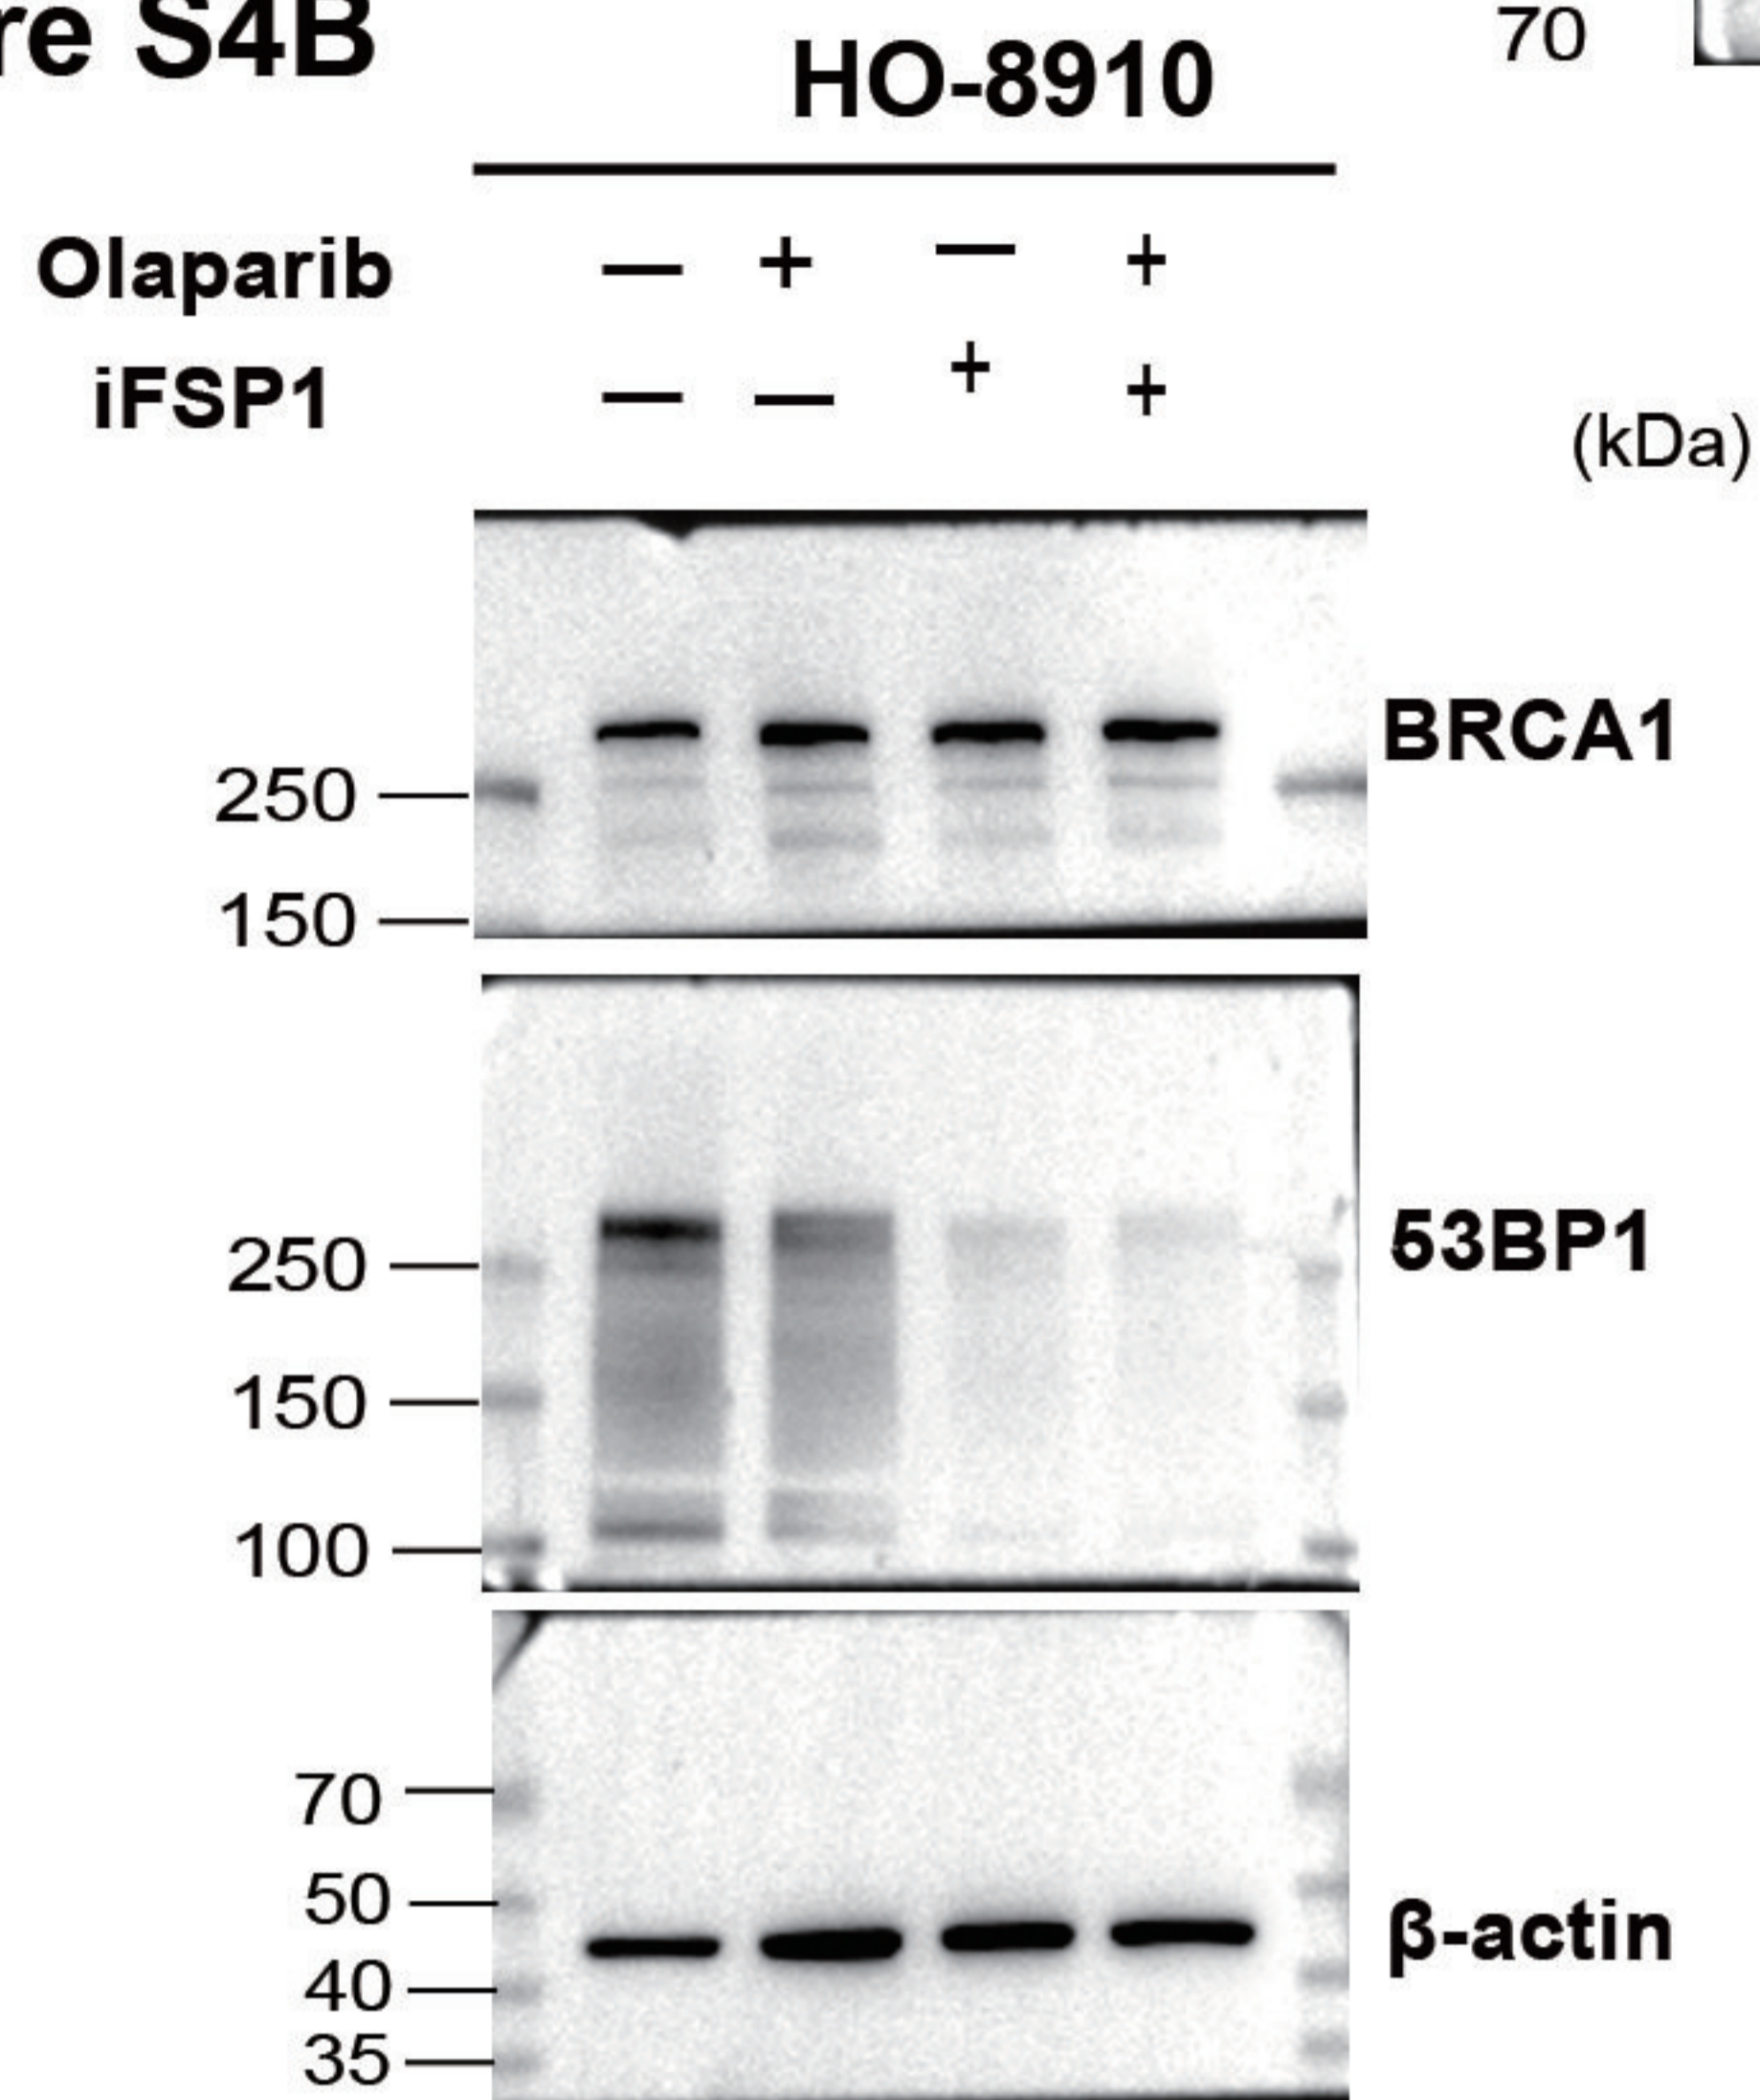**Figure S6A**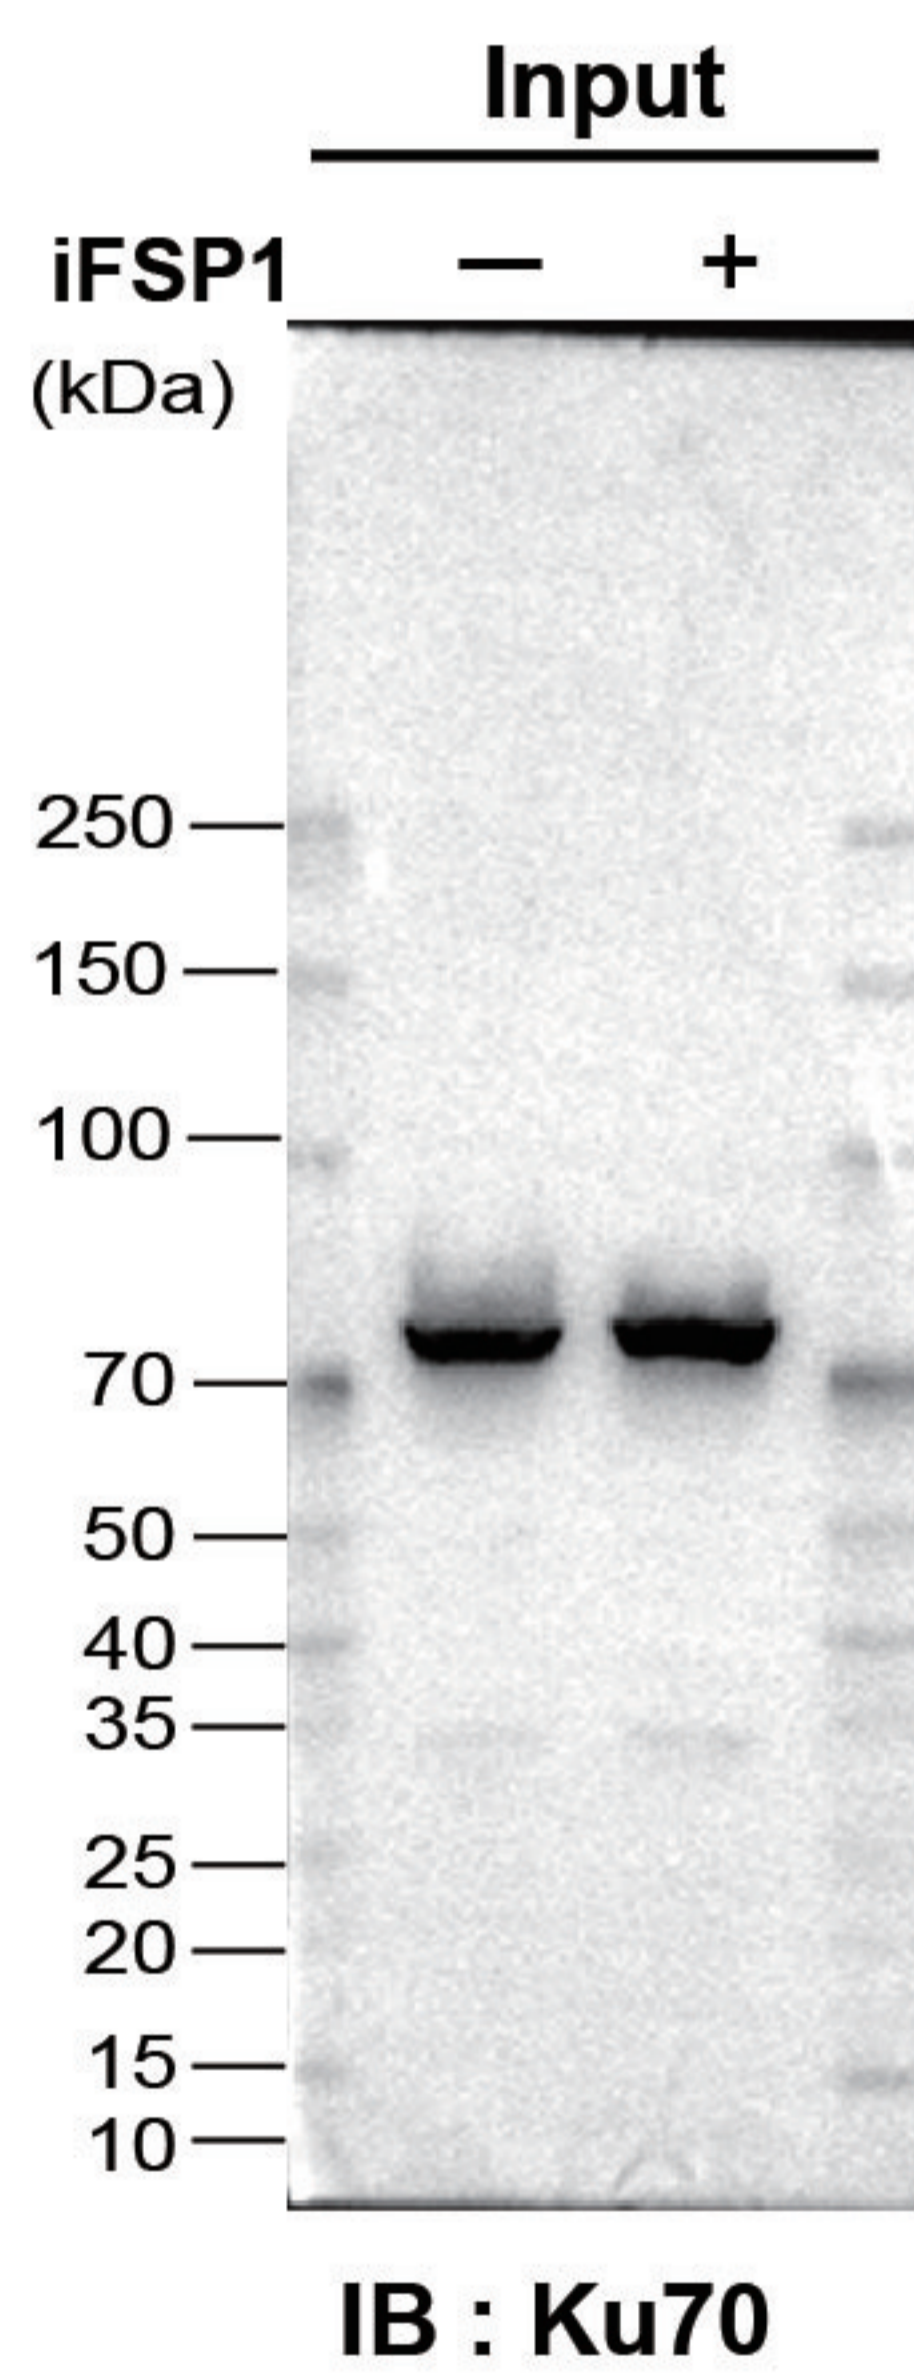**Figure S6B**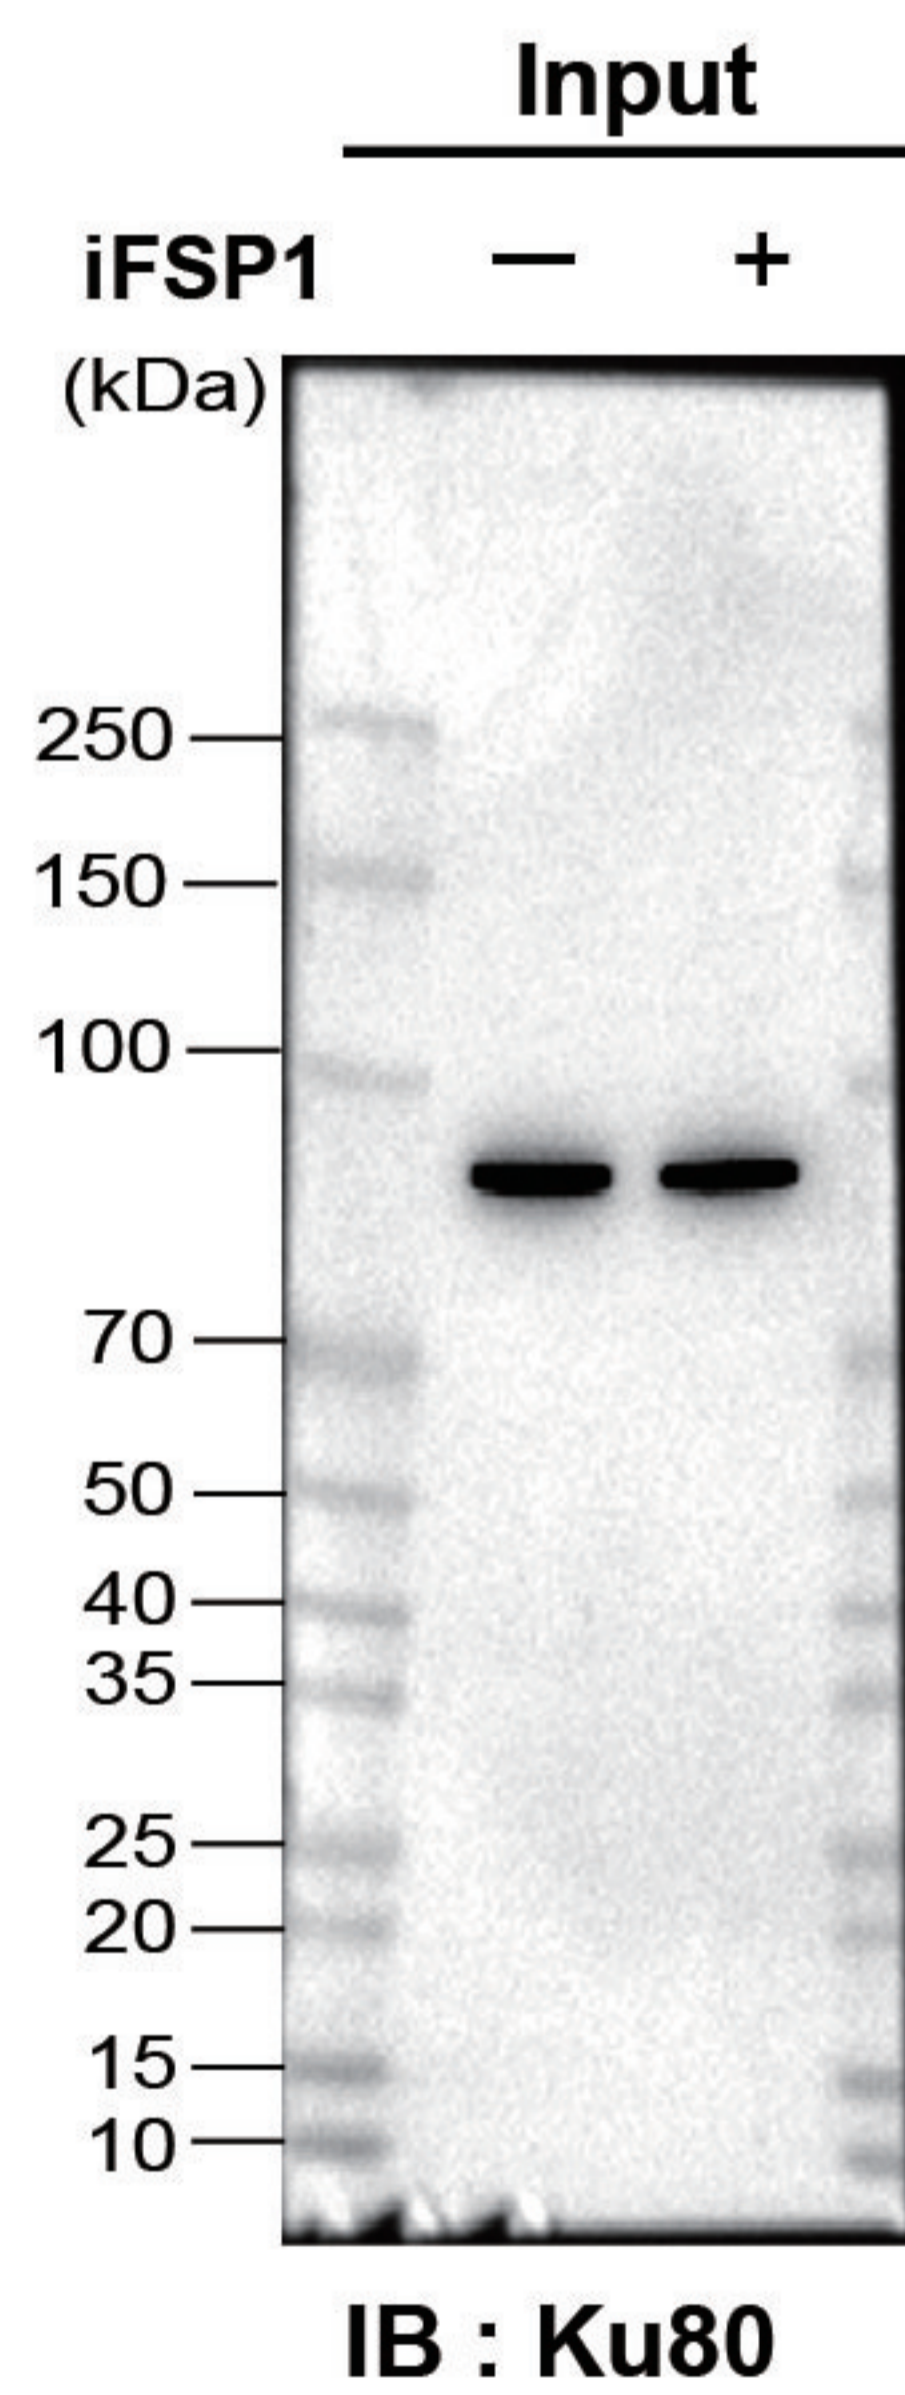**Figure S6C**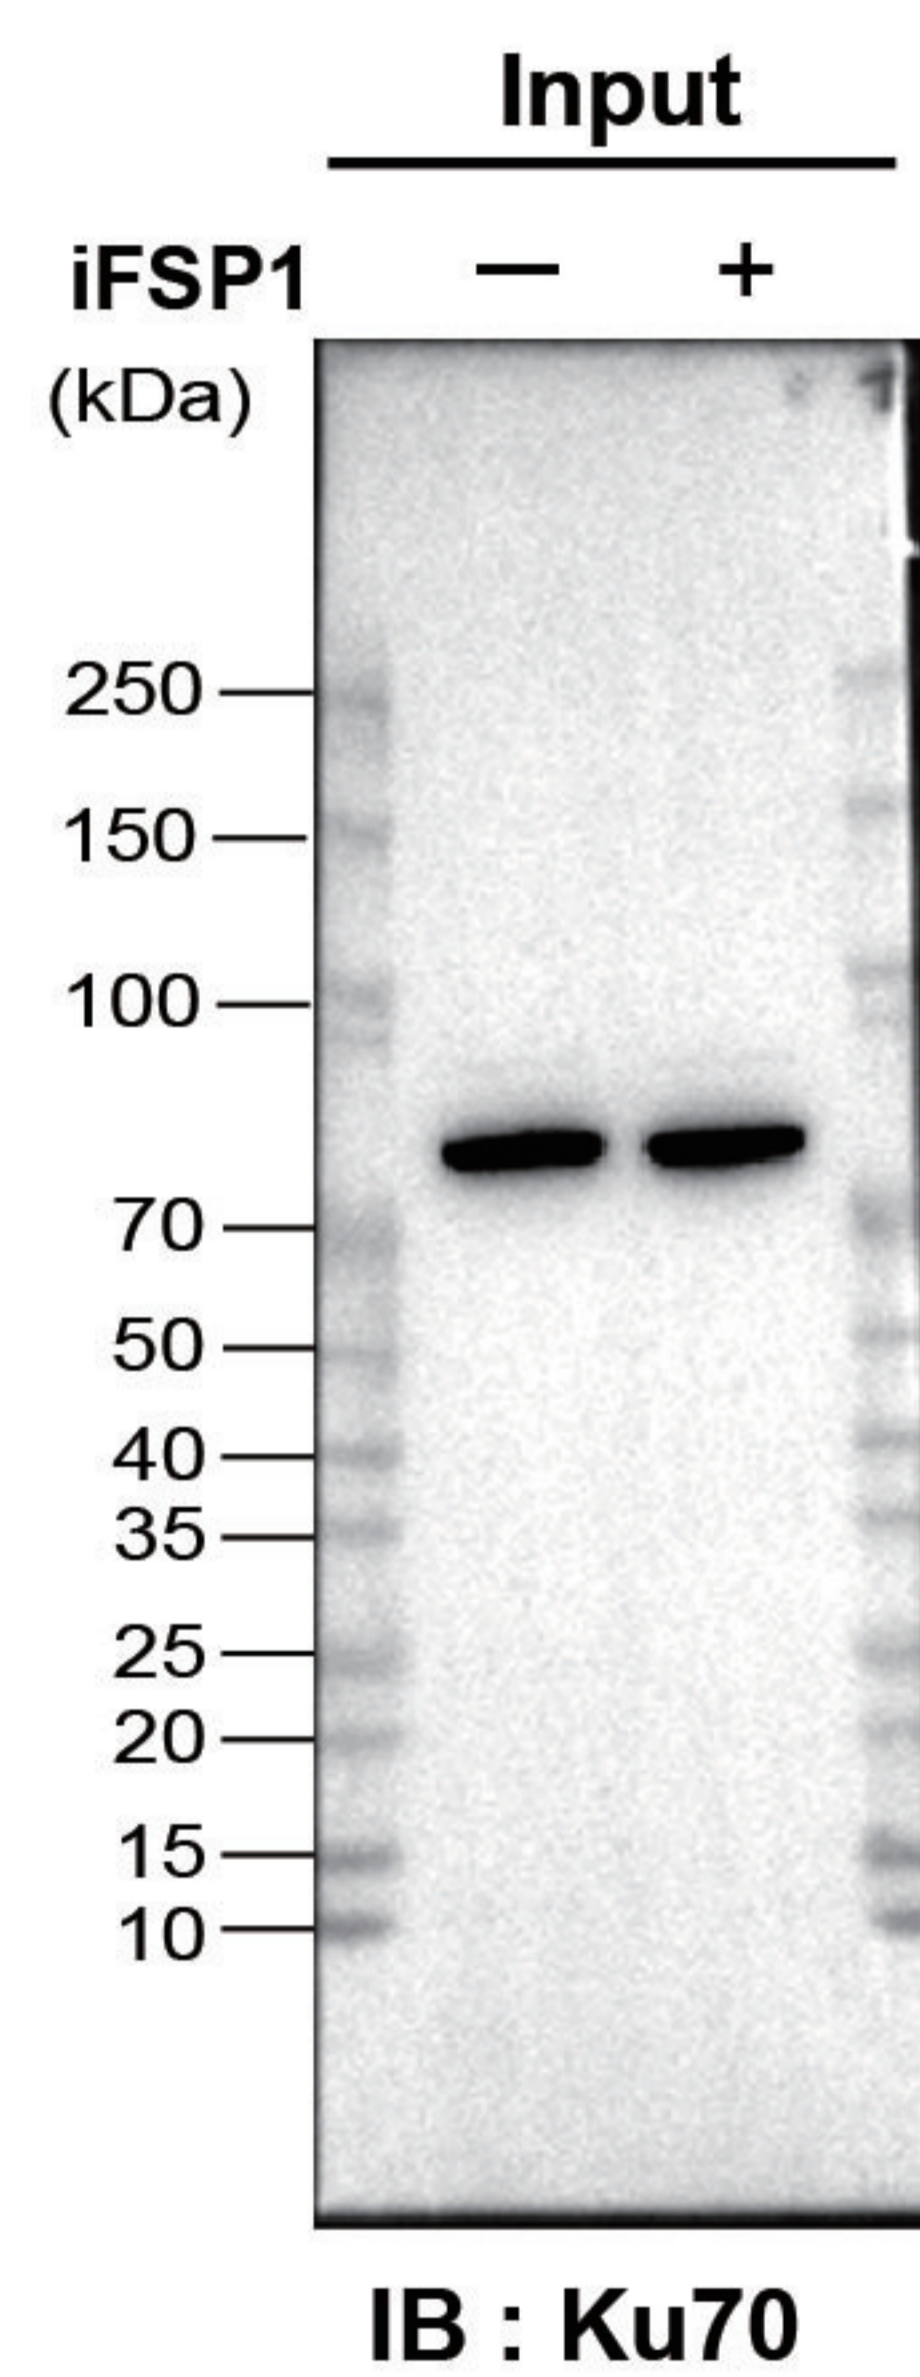**Figure S6D**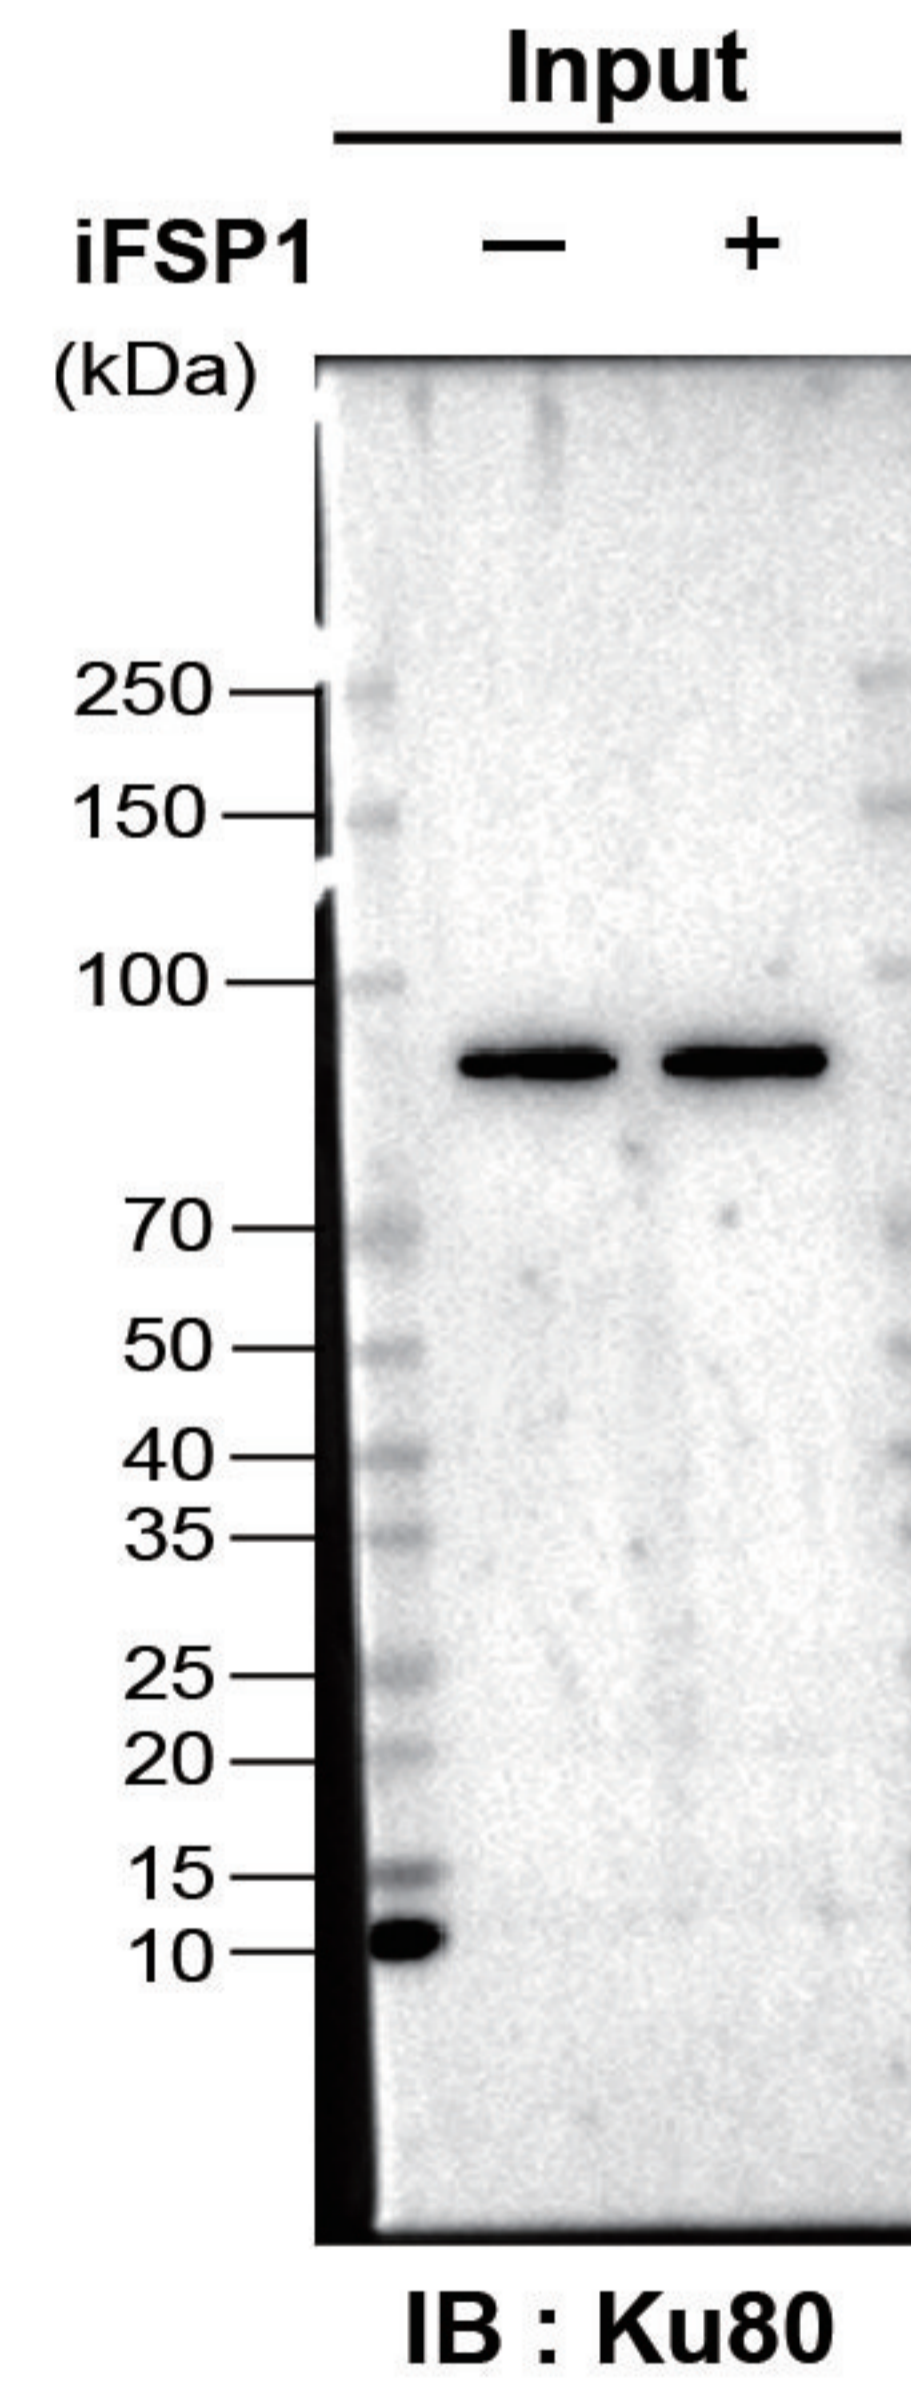**Figure S6F**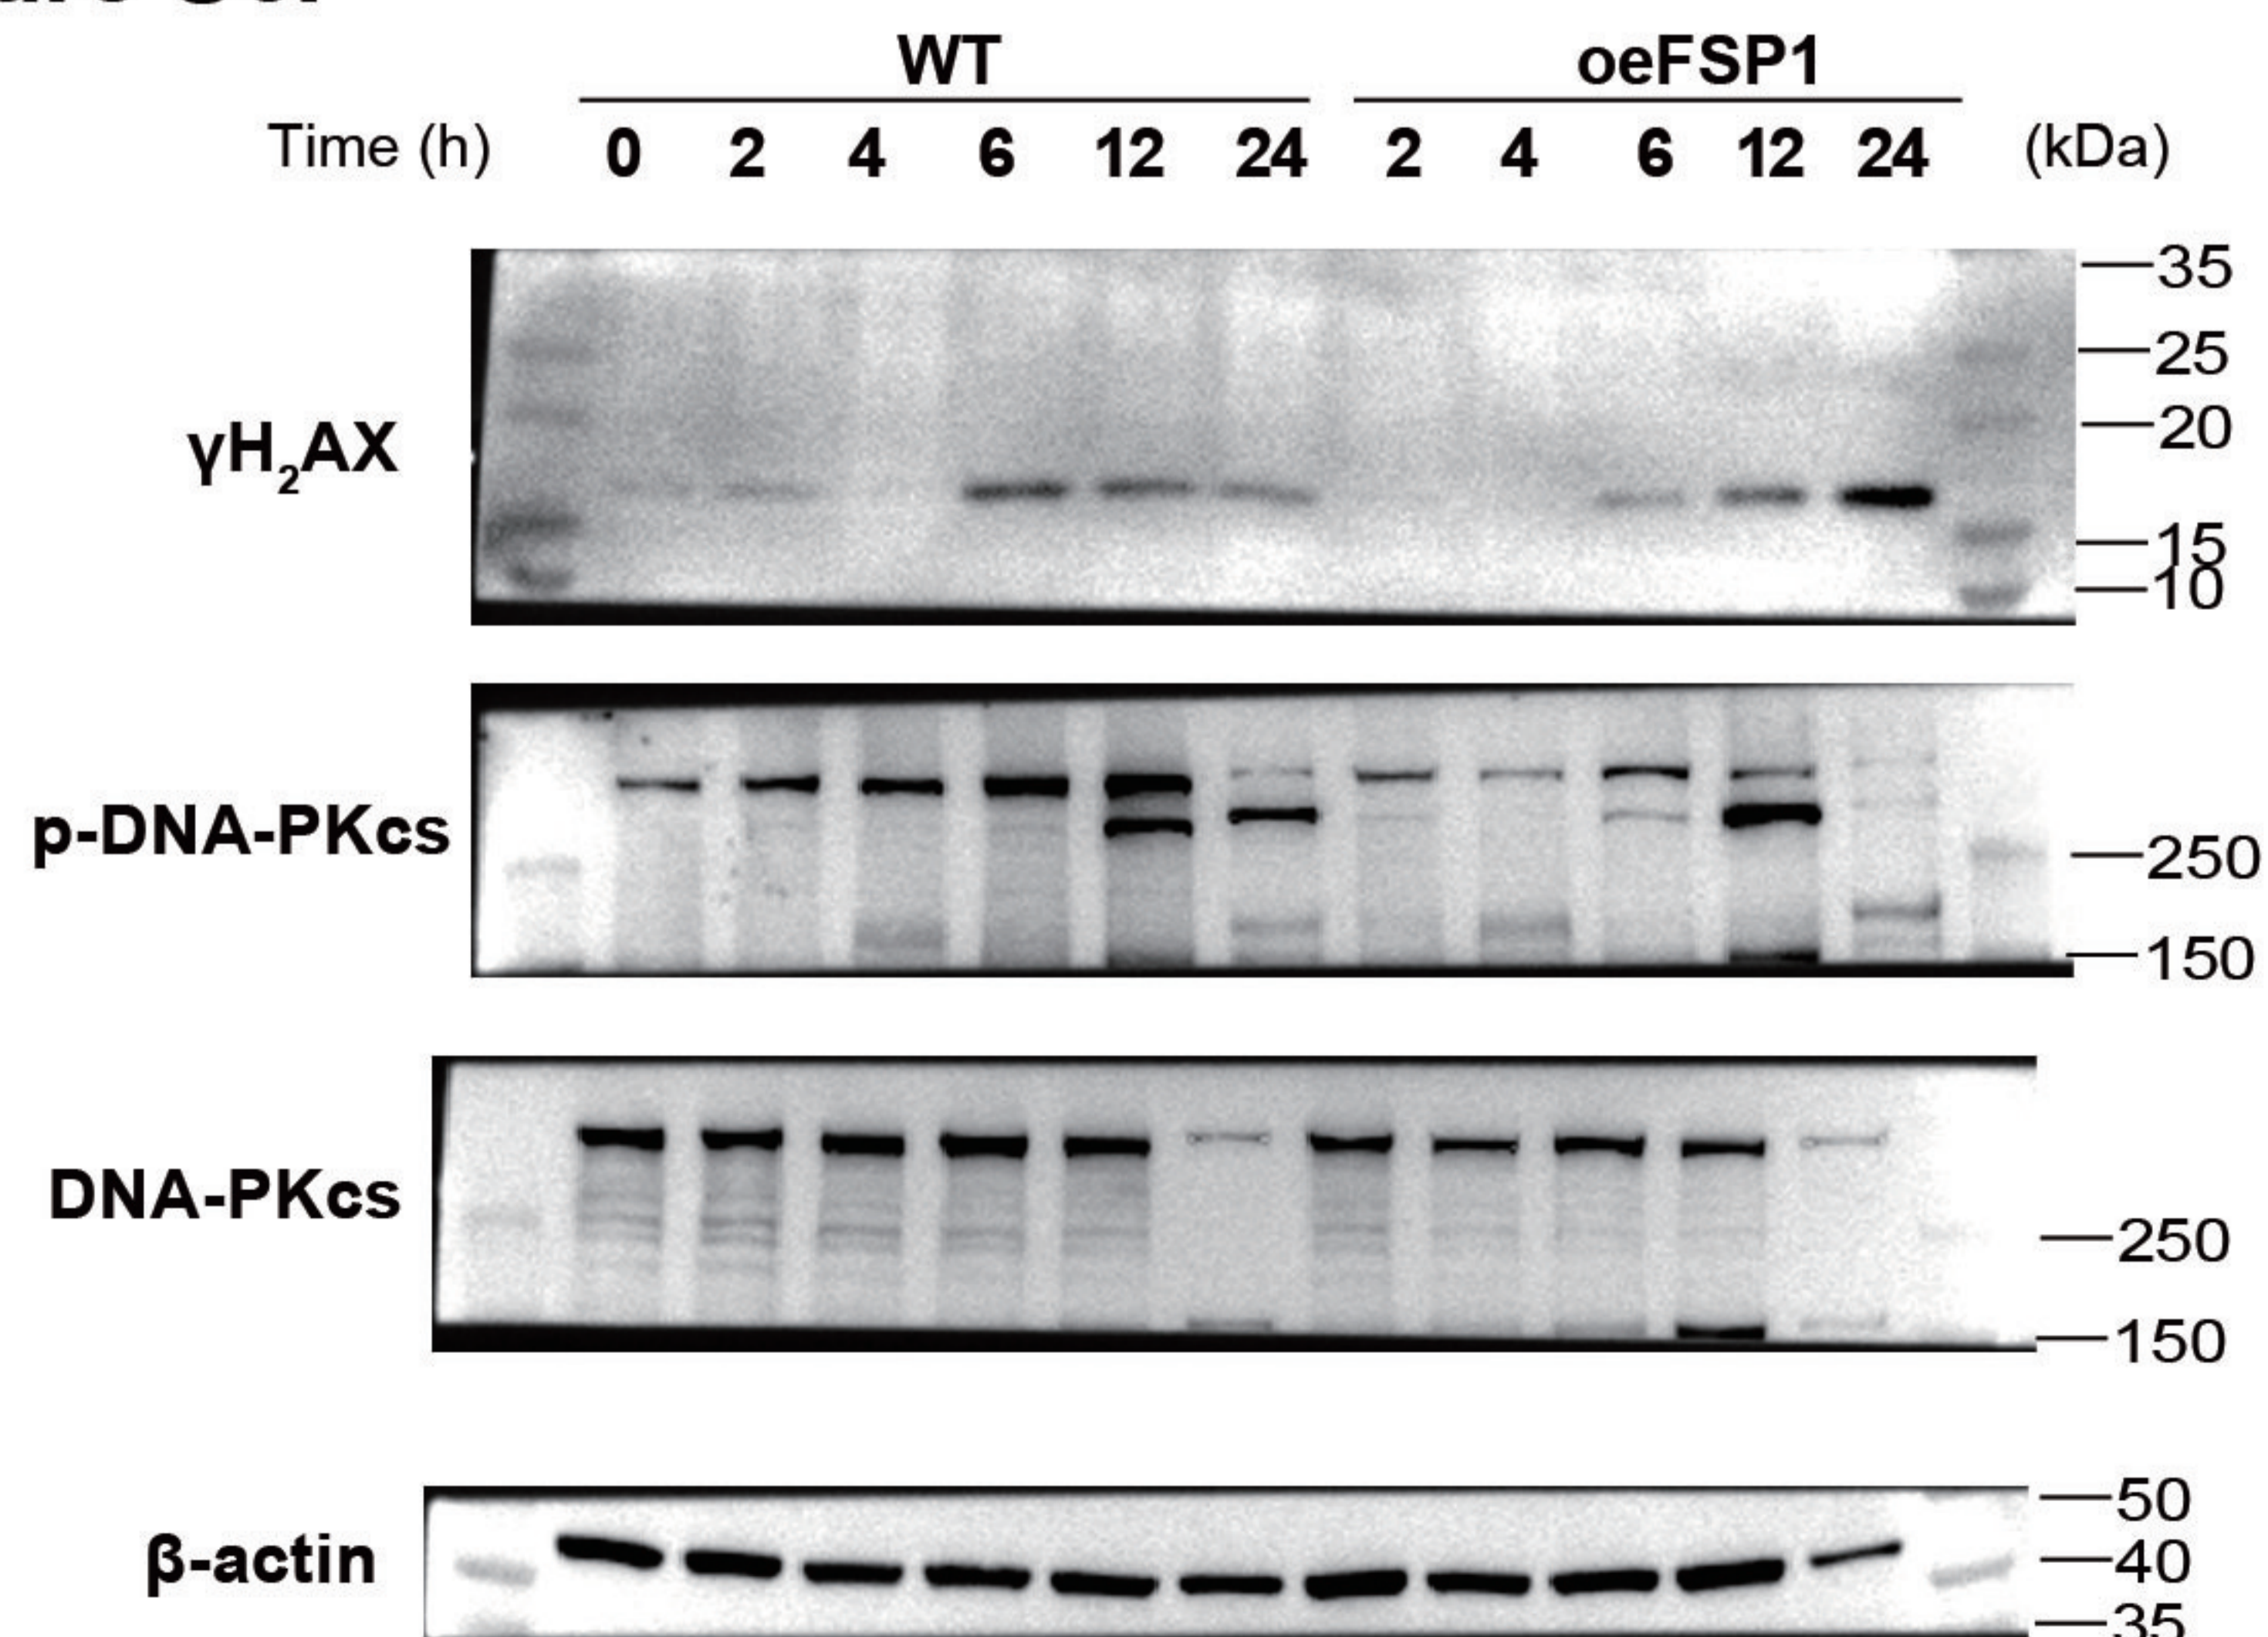

Supplement: 41418_2024_1263_MOESM1_ESM.pdf [file 41418_2024_1263_MOESM1_ESM.pdf]
